1 Article title (116 of max. 120 characters, including spaces):

2

3 **Evidence for dual targeting of Arabidopsis plastidial glucose-6-**  
4 **phosphate transporter GPT1 to peroxisomes via the ER**

5

6 Author names and affiliations:

7

8 **Marie-Christin Baune<sup>1</sup>, Hannes Lansing<sup>1</sup>, Kerstin Fischer<sup>1</sup>, Tanja Meyer<sup>1</sup>,**  
9 **Lennart Charton<sup>2</sup>, Nicole Linka<sup>2</sup> and Antje von Schaewen<sup>1\*</sup>**

10 *<sup>1</sup>Institut für Biologie und Biotechnologie der Pflanzen (IBBP), Westfälische Wilhelms-*  
11 *Universität Münster, Schlossplatz 7, D-48149 Münster, Germany*

12 *<sup>2</sup>Biochemie der Pflanzen, Heinrich-Heine-Universität Düsseldorf, Universitätsstraße 1,*  
13 *D-40225 Düsseldorf, Germany*

14

15 The author responsible for distribution of materials integral to the findings presented in this article in  
16 accordance with the policy described in the Instructions for Authors ([www.plantcell.org](http://www.plantcell.org)) are Antje von  
17 Schaewen ([schaewen@uni-muenster.de](mailto:schaewen@uni-muenster.de)) and Nicole Linka ([Nicole.Linka@uni-duesseldorf.de](mailto:Nicole.Linka@uni-duesseldorf.de)).

18

19 \*Corresponding author: Antje von Schaewen, e-mail: [Schaewen@uni-muenster.de](mailto:Schaewen@uni-muenster.de)

20

21 Short title (40 of max. 40 characters, including spaces):

22 GPT1 dually targets plastids and the ER

23

24 One sentence summary:

25 In contrast to plastidial GPT2, GPT1 exhibits slightly different exchange preferences and alternatively  
26 targets the ER, from where the protein can be relocated to peroxisomes on demand.

27

28 Keywords (max. 5): dual targeting, cytosolic redox transmitters, glucose-6-phosphate transporters,  
29 peroxisomal membrane protein targeting, oxidative pentose-phosphate pathway

30

31 Word count:

32 Abstract: 200

33 Introduction: 1403

34 Results: 2911

35 Discussion: 3196

36 Acknowledgments: 135

37 M & M: 1704

38 Total main: 9549

39 Tables: 601

40 Fig. legends: 2283

41 (References 3860)

42

43 **ABSTRACT** (200 words)

44

45 Former studies on Arabidopsis glucose-6-phosphate/phosphate translocator isoforms GPT1  
46 and GPT2 reported viability of *gpt2* mutants, however an essential function for GPT1,  
47 manifesting as a variety of *gpt1* defects in the heterozygous state during fertilization/seed  
48 set. Among other functions, GPT1 is important for pollen and embryo-sac development.  
49 Since previous work on enzymes of the oxidative pentose phosphate pathway (OPPP)  
50 revealed comparable effects, we investigated whether GPT1 might dually localize to plastids  
51 and peroxisomes. In reporter fusions, GPT2 was found at plastids, but GPT1 also at the  
52 endoplasmic reticulum (ER) and around peroxisomes. GPT1 contacted oxidoreductases and  
53 also peroxins that mediate import of peroxisomal membrane proteins from the ER, hinting at  
54 dual localization. Reconstitution in yeast proteoliposomes revealed that GPT1 preferentially  
55 exchanges glucose-6-phosphate for ribulose-5-phosphate. Complementation analyses of  
56 heterozygous *gpt1* plants demonstrated that GPT2 is unable to compensate for GPT1 in  
57 plastids, whereas genomic *GPT1* without transit peptide (enforcing ER/peroxisomal  
58 localization) increased *gpt1* transmission significantly. Since OPPP activity in peroxisomes is  
59 essential during fertilization, and immuno-blot analyses hinted at unprocessed GPT1-specific  
60 bands, our findings suggest that GPT1 is indispensable at both plastids and peroxisomes.  
61 Together with the G6P-Ru5P exchange preference, dual targeting explains why GPT1 exerts  
62 functions distinct from GPT2 in Arabidopsis.

63

## 64 **INTRODUCTION** (1403 words)

65 In plant cells, the oxidative pentose phosphate pathway (OPPP) is found in plastids and the  
66 cytosol (reviewed in Kruger and von Schaewen, 2003), but transiently also in peroxisomes  
67 (Meyer et al., 2011; Hölscher et al., 2014; 2016). In each subcellular compartment, the OPPP  
68 has distinctive functions and thus requires subcellular distribution of the corresponding enzymes  
69 and their metabolites.

70 During the day, NADPH is provided by photosynthetic electron flow to ferredoxin-(Fd) NADP<sup>+</sup>  
71 oxidoreductase (FNR; Palatnik et al., 2003), whereas at night, the OPPP is the main source of  
72 NADPH in chloroplasts and in heterotrophic plastids of non-green tissues (Dennis et al., 1997).  
73 The oxidation of 1 mole glucose-6-phosphate (G6P) to ribulose-5-phosphate (Ru5P) produces 2  
74 moles of NADPH (at the expense of CO<sub>2</sub> release) in three enzymatic steps: i) glucose-6-  
75 phosphate dehydrogenase (G6PD), ii) 6-phosphogluconolactonase (6PGL), and iii) 6-phospho-  
76 gluconate dehydrogenase (6PGD). These irreversible reactions are followed by reversible OPPP  
77 steps in the stroma, comprising transketolase (TK) and transaldolase (TA) that create a broad  
78 range of phosphorylated intermediates. Since the reversible OPPP reactions share  
79 intermediates with the Calvin cycle, they are essential for plant metabolism (reviewed in Kruger  
80 and von Schaewen, 2003). In the cytosol of plant cells only the irreversible OPPP reactions  
81 occur (Schnarrenberger et al., 1995), linked to the full cycle in plastids via epimerization of Ru5P  
82 to Xu5P and import by the Xylulose-5-phosphate/phosphate translocator (XPT) in the inner  
83 envelope (Eicks et al., 2002).

84 NADPH is the preferred reducing equivalent of anabolic reactions, both in plastids and the  
85 cytosol, needed mostly for the biosynthesis of amino acids, fatty acids, and nucleotides  
86 (Hutchings et al., 2005; Geigenberger et al., 2005). Furthermore, NADPH is important for redox  
87 homeostasis of the glutathione pool (GSH/GSSG) via NADPH-dependent glutathione-disulfide  
88 reductases (GRs). Arabidopsis GR1 dually localizes in the cytosol and peroxisomes (Marty et  
89 al., 2009; Mhamdi et al., 2010; Kataya and Reumann, 2010) and GR2 in plastids and  
90 mitochondria (Marty et al., 2019). Hence, OPPP reactions play an important role in plant cells  
91 (Kruger and von Schaewen, 2003), particularly with the onset of stress or developmental  
92 change. Such conditions are often linked to physiological sink states induced by pathogen  
93 infection of leaves and related signaling. Resulting callose formation at plasmodesmata leads to  
94 sugar accumulation in the cytosol that stimulates G6PDH activity/expression and NADPH  
95 production via the OPPP (Hauschild and von Schaewen, 2003; Scharfe et al., 2009; Stampfl et  
96 al., 2016). Concomitantly activated NADPH oxidases at the plasma membrane (in plants called

97 respiratory burst oxidase homologues, Rbohs; Torres et al., 2002) use cytosolic NADPH for  
98 extrusion of reactive oxygen species (ROS) into the apoplast. Superoxide ( $O_2^-$ ) is converted to  
99 hydrogen peroxide ( $H_2O_2$ ) that enters the cell via aquaporins, leading to redox signaling in the  
100 cytosol.  $H_2O_2$  is dissipated by peroxiredoxins (Prx), which in turn retrieve electrons from  
101 glutaredoxins (Grx) and thioredoxins (Trx), and the resulting dithiol-disulfide changes modulate  
102 cognate target enzymes in a similar manner (reviewed in Noctor and Foyer, 2016; Waszczak et  
103 al., 2018; Liebthal et al., 2018). This scenario also accompanies abiotic stress responses (e.g. to  
104 drought or salt), together with phosphorylation cascades activated in parallel (Pitzschke et al.,  
105 2006; dal Santo et al., 2012; Fancy et al., 2016; Landi et al., 2016).

106 OPPP enzymes were also found in purified plant peroxisomes (Corpas et al., 1998; del Río et  
107 al., 2002; Reumann et al., 2007; Hölscher et al., 2016), where they may serve as NADPH source  
108 to establish redox homeostasis via dual cytosolic/peroxisomal GR1 (Kataya and Reumann,  
109 2010). Besides, NADPH is needed for metabolic reactions that occur exclusively in peroxisomes,  
110 like removal of double bonds in unsaturated fatty acid/acyl chains prior to  $\beta$ -oxidation, which  
111 includes final steps of auxin/jasmonic acid biosynthesis (Reumann et al., 2004). We previously  
112 reported that dual targeting of *Arabidopsis thaliana* OPPP enzymes G6PD1 (At5g35790, OPPP  
113 step 1) and PGL3 (At5g24400, OPPP step 2) to plastids and peroxisomes depends on the  
114 cytosolic redox state (Meyer et al., 2011; Hölscher et al., 2014). Furthermore, plants  
115 heterozygous for peroxisomal isoform PGD2 (At3g02360, OPPP step 3) failed to produce  
116 homozygous offspring due to mutual sterility of the *pgd2* gametophytes. This indicated for the  
117 first time an essential function of the OPPP in peroxisomes (Hölscher et al., 2016).

118 OPPP activity in organelles requires flux of intermediates across the corresponding membranes.  
119 In *Arabidopsis*, G6P import into plastids involves G6P/phosphate translocator GPT1  
120 (At5g54800) and GPT2 (At1g61800) in the inner envelope membrane (Kammerer et al., 1998;  
121 Eicks et al., 2002; Knappe et al., 2003; Niewiadomski et al., 2005). In case of peroxisomes,  
122 phosphorylated metabolites with a huge hydration shell are likely unable to pass the porin-like  
123 channel described for malate and oxaloacetate (134 and 130 Da) first described in spinach  
124 (Reumann et al., 1996). In mammalian cells, Rokka et al. (2009) measured that only molecules  
125 below 200 Da are able to pass the pore-like channel of Pxmp2. G6P and Ru5P/Xu5P are larger  
126 (258 Da and 230 Da), implying that they are unlikely transported via peroxisomal porins. Thus,  
127 the issue of OPPP substrate and product transport across peroxisomal membranes remained  
128 unclear so far.

129 To provide the peroxisomal OPPP reactions with substrate, we reasoned that one of the two  
130 Arabidopsis GPT proteins may dually localize to peroxisomes, similar to originally plastid-  
131 annotated OPPP isoforms G6PD1 (Meyer et al., 2011) and PGL3 (Kruger and von Schaewen,  
132 2003; Reumann et al., 2004; Hölscher et al., 2014). GPT1 and GPT2 show 81% identity at the  
133 amino-acid level and catalyze the import of G6P into heterotrophic plastids needed for starch  
134 synthesis and NADPH provision via the stromal OPPP reactions (Kammerer et al., 1998). GPT2  
135 expression is most abundant in heterotrophic tissues (senescing leaves, sepals, seeds) and can  
136 be induced by high light in leaves (Athanasίου et al., 2010; Weise et al., 2019), whereas GPT1 is  
137 ubiquitously expressed, with highest levels in reproductive tissues (Niewiadomski et al., 2005;  
138 Kunz et al., 2010). Loss of GPT2 function reduced starch levels, but yielded vital plants  
139 (Niewiadomski et al., 2005; Kunz et al., 2010; Athanasίου et al., 2010; Dyson et al., 2014; 2015).  
140 However, lack of GPT1 was detrimental, leading to an early arrest of pollen and ovule develop-  
141 ment. Resulting gametophyte and embryo lethality showed as incompletely filled siliques  
142 (Niewiadomski et al., 2005; Andriotis et al., 2010; Flügge et al., 2011).

143 We noticed that GPT1 displays a canonical C-terminal peroxisomal targeting signal type 1  
144 (PTS1 motif AKL) that matches the consensus (S/A)-(K/R)-(L/M/I) of soluble proteins (Gould et  
145 al., 1989; Reumann, 2004; Platta and Erdmann, 2007; Reumann and Bartel, 2016). This  
146 seemed odd, since peroxisomal membrane proteins (PMPs) exhibit independent mPTS motifs of  
147 varying sequence (Rottensteiner et al., 2004). In general, two classes of PMPs are known.  
148 Class-I PMPs are directly inserted into peroxisomal membranes (PerMs) from the cytosol, which  
149 involves peroxins Pex3 and Pex19 (in some organisms also Pex16; Platta and Erdmann, 2007).  
150 By contrast, class-II PMPs are first inserted into the endoplasmic reticulum (ER) via the Sec61  
151 import pore and then transported to the peroxisomal ER (perER), from where peroxisomes are  
152 formed *de novo* (Theodoulou et al., 2013; Reumann and Bartel, 2016; Kao et al., 2018). The  
153 exact mechanism remains to be resolved, but involvement of Pex16 and Pex3 for ER  
154 recruitment and sorting to peroxisomes is most likely (Aranovich et al., 2014). Interestingly,  
155 mutation of Arabidopsis *PEX16* resulted in a shrunken seed phenotype (*sse1*) with impaired fatty  
156 acid biosynthesis (Lin et al., 1999, 2004), reminiscent of some *gpt1* defects (Niewiadomski et al.,  
157 2005), but no defects in pollen germination.

158 Here we report that both GPT1 and GPT2 may insert into the ER, but only the N-terminal part of  
159 GPT1 is able to initiate ER targeting, a prerequisite shared with class-II PMPs. Co-expression of  
160 various reporter fusions was used to analyze subcellular localization and protein interaction of  
161 GPT1 in plant cells. GPT1 formed homodimers at plastids, but not readily at the ER, and  
162 interacted with two cytosolic oxidoreductases listed by the Membrane-based Interactome

163 Network Database (MIND) for Arabidopsis proteins with 38% confidence (Lalonde et al., 2010;  
164 Chen et al., 2012; Jones et al., 2014). In addition, we found evidence for transient interaction of  
165 GPT1 with early peroxins involved in PMP delivery via the ER. As rare event, GPT1-reporter  
166 fusions were detected in membrane structures surrounding peroxisomes. Our main questions  
167 were: 1) which protein parts confer dual targeting; 2) how this may be regulated; 3) which OPPP  
168 metabolite leaves peroxisomes; and 4) whether some defects of heterozygous *gpt1* mutant  
169 plants (Niewiadomski et al., 2005) may be related to missing transport across peroxisomal  
170 membranes during fertilization.

171

172

## 173 **RESULTS** (2911 words)

174

### 175 **GPT1 dually targets plastids and the ER**

176 The alignment of GPT1 and GPT2 protein sequences from different *Brassicaceae*  
177 (Supplemental Figure 1) revealed that the isoforms mostly diverge at their N-terminal ends,  
178 whereas the central transmembrane regions (for substrate binding/transport) are highly  
179 conserved. Subcellular targeting was studied with various N- and C-terminal reporter fusions of  
180 the two Arabidopsis GPT isoforms and examined in transfected protoplasts (Arabidopsis or  
181 tobacco) by confocal laser-scanning microscopy (CLSM).

182 All N-terminally masked/truncated GPT variants (Supplemental Figure 2A) localized at the ER  
183 (Supplemental Figure 2B, green signals) as determined by co-expression with organelle markers  
184 (magenta signals), i.e. G/OFP-ER (Rips et al., 2014) or peroxisome (Per) marker G/OFP-  
185 PGL3\_*C-short* (formerly named G/OFP-PGL3(~50aa)-SKL; Meyer et al., 2011). Note that co-  
186 localization of green and magenta signals appears white. Both GPT fusions occasionally formed  
187 *Z membranes* (Supplemental Figure 2B, white patches), a term coined for overexpressed  
188 integral membrane proteins (Gong et al., 1996). GPT1\_*C-full* labeled ring-like substructures of  
189 the ER, approximately 3 μm in diameter (Supplemental Figure 2C, panel b), and interfered with  
190 import of the peroxisome marker (Supplemental Figure 2B, panel n), which was never observed  
191 for GPT2\_*C-full* (Supplemental Figure 2B, panel p). Mutagenesis of GPT1-AKL to -AKQ (or  
192 GPT2-AKQ to -AKL) had no effect on localization of the fusion proteins (not shown).

193 Among the C-terminal reporter fusions, localization of GPT1 also differed from GPT2. The GPT1  
194 *full-length* version (Figure 1A), with GFP pointing to the plastid stroma (or cytosol, when inserted  
195 into the ER), was spotted at both plastids and the ER (Figure 1B, panels a,c, arrowheads), but

196 GPT2 only at plastids (Figure 1B, panels b,d, green signals; for single channel images, see  
197 Supplemental Figure 3B). A region comprising the N-terminus plus first five membrane domains  
198 (*N-5MD*, 1-240 amino acids) with OFP pointing to the intermembrane space (IMS), labeled the  
199 plastid surface (Supplemental Figure 4B, panels a-d; green signals). The N-terminus plus first  
200 two membrane domains (*N-2MD*, 1-155 amino acids) with GFP pointing to the stroma showed  
201 patchy plastid labeling, indicative of partial reporter cleavage (Supplemental Figure 4B, panels e-  
202 h), and in case of GPT1 also ER labeling (Figure 4B, panels e, and f, arrowheads), albeit to  
203 varying extent (Supplemental Figure 4C, panels a-e). Again, small ring-like structures of  
204 peroxisomal size were labeled by GFP, but without surrounding the peroxisome marker (Supple-  
205 mental Figure 4C, panel e, single sections). With the N-terminal region (*N-term*, 1-91/92 amino  
206 acids) fused to the reporter, stroma labeling was observed for both GPT proteins (Supplemental  
207 Figure 4B, panels i-l). These results indicated that the region comprising the N-terminus plus first  
208 two transmembrane GPT1 domains is important for alternative targeting to the ER.

209

### 210 **The first 155 amino acids of GPT1 are crucial for ER targeting**

211 To exclude localization artifacts by masking N- or C-terminal targeting signals, we also cloned  
212 GPT-fusions with internal reporter at two different positions (Supplemental Figure 5A). Again, the  
213 GPT1 versions (*GPT1\_2MD:8MD* and *GPT1\_5MD:5MD*) labeled both plastids and the ER  
214 (Supplemental Figure 5B, panels a,b and e,f; arrowheads), whereas the GPT2 versions  
215 (*GPT2\_2MD:8MD* and *GPT2\_5MD:5MD*) only plastids (Supplemental Figure 5B, panels c,d and  
216 g,h). Protoplasts expressing the *GPT\_2MD:8MD* fusions were additionally treated with Brefeldin  
217 A (BFA), which interfered with delivery of peroxisomal ascorbate peroxidase (pxAPX) via the ER  
218 (Mullen et al., 1999). BFA treatment abolished GPT1 signals at the ER, but not at plastids  
219 (neither of GPT2; Supplemental Figure 6). This confirmed direct GPT targeting to plastids, and  
220 that only GPT1 may insert into the ER.

221 Since alternative GPT1 localization seemed mediated by the soluble N-terminal part that  
222 strongly differs from GPT2 (Figure S1), amino acid positions suspected to be subject to post-  
223 translational modification were changed by site-directed mutagenesis in the medial  
224 *GPT1\_5MD:5MD* fusion (Figure 1C). However, neither S27 (listed by PhosPhAt 4.0; Zulawski et  
225 al., 2013) changed to alanine (A, abolishing phosphorylation) or aspartate (D, mimicking  
226 phosphorylation; Ackerley et al., 2003), nor single cysteine C65 changed to serine (S, precluding  
227 redox modification) interfered with ER targeting. Domain swaps among the corresponding  
228 unmodified *medial* reporter constructs (Figure 2A) resulted in dual localization of  
229 *GPT1\_2MD:8MD\_GPT2* and *GPT1\_5MD:5MD\_GPT2* to plastids and the ER (Figure 2B, panels

230 a,b and e,f; arrowheads), but solely plastid localization of GPT2\_2MD:8MD\_GPT1 and  
231 GPT2\_5MD:5MD\_GPT1 (Figure 2B, panels e,d and g,h; for single channel images, see  
232 Supplemental Figure 7). These results proved that the GPT1 N-terminus (plus first two MDs) is  
233 crucial for initiating alternative ER targeting.

234

### 235 **GPT1 dimer formation occurs at plastids and substructures of the ER**

236 In functional form, the plastidial phosphate translocators are dimers composed of two identical  
237 subunits (Knappe et al., 2003). We therefore reasoned, if not necessary for ER targeting, amino  
238 acids S27 and/or C65 may be important for preventing GPT1 dimerization prior to reaching the  
239 final location(s). Therefore N- and C-terminal split YFP constructs of GPT1 were cloned and  
240 above described amino-acid changes introduced. Arabidopsis protoplasts were transfected and  
241 analyzed for GPT1-dimer formation (Figure 3) by bimolecular fluorescence complementation  
242 (BiFC; Walter et al., 2004). Reconstitution of the GPT1-split YFP combinations was detected  
243 only at plastids (Figure 3B, panels a-d), without effect of the indicated amino acid changes. In  
244 case of the split YFP-GPT1 fusions (enforcing ER insertion), large signal accumulations in the  
245 ER (including perinuclear structures) were observed for most variants. This signal did not  
246 represent the usually observed ER pattern and even affected distribution of the ER marker (see  
247 Figures 1 and 2). Among the amino acid changes analyzed, only C65S had an effect, resulting in  
248 hollow spherical structures surrounding single peroxisomes (Figure 3C, arrowhead) compared to  
249 the wild-type situation or S27 changes (Figure 3B, compare panels f-g to panel i, arrowhead; for  
250 single channel images, see Supplemental Figure 8). Thus, ER insertion seems not to require  
251 posttranslational modification, but sorting to PerMs may be negatively regulated by C65  
252 modification.

253

### 254 **GPT1 recruitment to the ER involves redox transmitters**

255 To find potential interaction partners of GPT1, the Membrane-based Interactome Database  
256 (MIND) of Arabidopsis proteins (based on split ubiquitin reconstitution in yeast; Lalonde et al.,  
257 2010), was searched. Two cytosolic oxidoreductases, Thioredoxin *h7* (Trx<sub>h7</sub>, At1g59730) and  
258 Glutaredoxin *c1* (Grx<sub>c1</sub>, At5g63030), were among the 21 candidates listed with highest score  
259 (Supplemental Table 1). BiFC analyses in Arabidopsis protoplasts confirmed interaction of GPT1  
260 with Trx<sub>h7</sub> (Figure 4A) and Grx<sub>c1</sub> (Figure 4B) at the ER and its substructures, but not at plastids  
261 (Figure 4A, panel b), and more clearly when the N-terminus of GPT1 was masked (enforcing ER  
262 insertion). Occasionally, ER-derived membranes around peroxisomes were labeled (Figure 4A,  
263 panel b and d; Figure 4B, panel b, arrowheads), which was less obvious when the N-terminus of



264 Grx<sub>c1</sub> was masked by split YFP (Figure 4B, panels c,d). To enhance interaction among the  
265 Arabidopsis proteins, selected BiFC combinations were co-expressed with the other oxido-  
266 reductase as OFP fusion in heterologous tobacco protoplasts. Similar results were obtained  
267 (Figure 4C and D) and also smaller spherical structures (<3 μm) detected. Of note, in simple co-  
268 expression studies, both Trx<sub>h7</sub>-OFP and Grx<sub>c1</sub>-OFP partially overlapped with the ER marker  
269 (Supplemental Figure 9B, white signals), confirming predicted N-myristoylation, and co-localized  
270 with GPT1\_*N-2MD*-GFP at the ER (Supplemental Figure 9C). These results are consistent with  
271 the two oxidoreductases assisting GPT1 insertion into the ER and/or sorting to peroxisomes.

272

### 273 **GPT1 contacts peroxins Pex3 and Pex16 at the ER**

274 While class-I PMPs are inserted into PerMs directly from the cytosol (involving Pex3 and Pex19),  
275 class-II PMPs are first inserted into the ER (Platta and Erdmann, 2007). Since Pex3, Pex16, and  
276 Pex19 play also central roles during ER insertion, sorting of peroxisomal membrane proteins,  
277 and peroxisome biogenesis (Reumann and Bartel, 2016; Kao et al., 2018), we set out to analyze  
278 potential interaction with GPT1. In Arabidopsis, two Pex3 genes, Pex3-1 (At3g18160) and  
279 Pex3-2 (At1g48635; Hunt and Trelease, 2004), one Pex16 gene (At2g45690; Karnik and  
280 Trelease, 2005) and two Pex19 genes, Pex19-1 (At3g03490) and Pex19-2 (At5g17550; Hadden  
281 et al., 2006) exist. Analysis of N- and C-terminal reporter fusions in protoplasts revealed mainly  
282 PerM labeling for the two Pex3 isoforms, ER and PerM labeling for Pex16 (see also Lansing et  
283 al., 2019), and mostly cytosolic distribution for the two Pex19 isoforms (Supplemental Figure 10,  
284 shown for one of the two Pex3 and Pex19 isoforms). OFP-Pex3-1 displayed weak signals in the  
285 cytosol (not shown). BiFC analyses were conducted with Pex3-1, Pex16 and Pex19-1. GPT1  
286 interaction with Pex3-1 and Pex16 was detected at PerMs, partially contiguous with the ER  
287 (Figure 5A, panels a,b). By contrast, GPT1 interaction with Pex19 was mostly distributed across  
288 the cytosol, but also labeled spherical structures (Figure 5A, panel d), when the C-terminal  
289 farnesylation motif (McDonnell et al., 2016) was accessible. Again, Pex16-GPT1 interaction  
290 interfered with import of the peroxisome (Per) marker (Figure 5A, panel b, magenta signals  
291 largely cytosolic), as already observed for GFP-GPT1\_*C-full* (Supplemental Figure 2, panel n).

292 Co-expression of GFP-GPT1\_*C-full* with the OFP-based Pex fusions resulted in different  
293 patterns (Figure 5B), suggesting that the Pex interactions are merely transient. Co-expression  
294 with Pex3-1-OFP led in part to perinuclear localization of GFP-GPT1\_*C-full*, reminiscent of the  
295 BiFC data obtained for GPT1 homodimerization (Figure 5B, panel a compared to Figure 3,  
296 panels f-i). Interestingly, Pex16 co-expression had visible effects on GPT1 localization,  
297 promoting concentration/vesiculation at the ER (Figure 5B, panel b), similar to Pex16 alone, but

298 distinct from it (Supplemental Figure 10, compare B to C). In co-expression, Pex19-1 seemed to  
299 have no impact on GPT1 localization (Figure 5B, panels c and d).

300 To make sure that the co-expression patterns obtained with Pex16 are no artifacts due to  
301 expression from the strong constitutive CaMV 35S promoter (*Pro35S*), two N-terminally  
302 truncated GPT1 versions (designated for stable plant transformation) were expressed also from  
303 the own promoter (*ProGPT1*), which gave comparable results (Figure 5C, for single channel  
304 images, see Supplemental Figure 11). Together with above BiFC analyses (Figure 5A), this  
305 demonstrated that ER-inserted GPT1 can be dragged to PerMs, and thus behaves like a class-II  
306 PMP that requires a special trigger to contact partner(s) (including Pex3 and Pex16) to reach  
307 mature peroxisomes.

### 308 309 **GPT1 may be recruited to peroxisomes and preferentially exchanges G6P for** 310 **Ru5P**

311 After plastid import, the N-terminal transit peptide (TP) of the precursor proteins is usually  
312 cleaved off (Schmidt et al., 1979; Chua and Schmidt, 1979). According to the recent elucidation  
313 of the 3-dimensional structure of the Arabidopsis triose-phosphate/phosphate translocator (Lee  
314 et al., 2017), both N- and C-terminal ends of GPT face the stroma. In case of GPT1 insertion into  
315 the ER, both the unprocessed N-terminus and C-terminal end should point to the cytosol, which  
316 was confirmed by topology analyses using *roGFP* (Supplemental Figure 12). To test whether N-  
317 terminal modification or lack of transit-peptide processing might affect transport activity, we  
318 fused an N-terminal His tag (or GFP) to the *full-length* and *mature* GPT1 versions (with *mature*  
319 GPT2 as control) and measured metabolite exchange of the recombinant proteins in  
320 reconstituted yeast proteoliposomes (Linka et al., 2008). For the physiological exchange of G6P  
321 versus Pi using the mature versions (Figure 6A), His-matGPT1 reached about one third of the  
322 His-matGPT2 rates (with comparable expression levels in yeast cells, not shown). N-terminal  
323 modification by GFP did not affect the transport rates of GPT1, but presence of the transit  
324 peptide (equivalent to localization at the ER/PerMs) reduced transport rates by about half (not  
325 shown).

326 The *Pro35S:GFP-GPT1\_C-mat* construct was stably introduced into heterozygous *gpt1-2* plants  
327 by floral dip transformation (Clough and Bent, 1998). Similar immunoblot patterns were obtained  
328 for the GFP-GPT1 proteins extracted from yeast or plant cells (Figure 6B, green arrowheads). In  
329 leaf cells of soil-grown plants, ER labeling dominated, but also spherical structures ( $\leq 3 \mu\text{m}$ ) were  
330 detected (Figure 6C, top panels). Obviously, ER insertion of *mature* GPT1 occurs by default, but  
331 sorting to PerMs requires a stimulus. When mesophyll protoplasts were prepared from

332 transgenic leaf material and transfected with the peroxisome (Per) marker (OFP-PGL3\_ *C-short*),  
333 GFP-labeled structures resembling newly forming peroxisomes appeared (Figure 6C, bottom  
334 panels; arrowheads).

335 If GPT1 imports G6P into peroxisomes, we wondered what might happen to Ru5P, the product  
336 of the three irreversible OPPP reactions. Especially, since analyses of the ribulose-5-phosphate  
337 epimerase (RPE) isoforms At1g63290 (cytosolic), At3g01850 (cytosolic), and At5g61410  
338 (plastidic) (Kruger and Von Schaewen, 2003) did not give any hint on peroxisomal localization  
339 (unpublished data). We therefore analyzed, whether the *mature* GPT versions (with N-terminal  
340 His tag) may exchange G6P for Ru5P. As shown in Table 1, the relative velocity of matGPT1  
341 was higher for G6P-Ru5P (112%) than for Pi-Ru5P exchange (59%), and differed from  
342 matGPT2 (87% for G6P-Ru5P and 75% for Pi-Ru5P). Importantly, exchange rates for 6-  
343 phosphogluconate (6PG <10%) were negligible.

344

### 345 **Stress and developmental stimuli enhance ER targeting of GPT1**

346 Since protoplast preparation (which is achieved by treating leaves with fungal enzymes) of stably  
347 transformed leaves led to recruitment of GFP-GPT1\_ *C-mat* to peroxisomes, we tested whether  
348 also treatment with a bacterial elicitor (flagellin) may affect GPT localization. Both, *GPT1*- and  
349 *GPT2-N-full-GFP* constructs were co-transfected with peroxisome (Per) marker OFP-PGL3\_ *C*-  
350 *short* in Arabidopsis protoplasts, samples were split in half, and analyzed after 24 h of mock or  
351 flg22 treatment. The latter led to enhanced GPT1 recruitment to the ER (Figure 7A, arrow-  
352 heads), without major effect on plastid localization (GPT2 was neither affected; for single  
353 channel images, see Supplemental Figure 13).

354 In addition, His-tag versions of the GPT1 and GPT2 N-termini were cloned and (following over-  
355 expression in *E. coli*) affinity-purified and used for raising polyclonal antisera in rabbits. The  
356 obtained  $\alpha$ -GPT1 antiserum specifically recognized the N-terminus of GPT1 but not GPT2  
357 (Supplemental Figure 14). Immunoblot analyses of different Arabidopsis tissues detected  
358 prominent high molecular weight bands in soluble fractions of flower, silique and seedling tissue  
359 - but not leaf extracts (Figure 7B), with stronger labeling in *gpt2* (Niewiadomski et al., 2005) and  
360 *xpt-2* (Hilgers et al., 2018), but not *tpt-5* mutant plants (Figure 7C). In total, four bands were  
361 found in reproductive tissues/seedlings and three bands in leaves. The latter resembled those  
362 reported for <sup>35</sup>S-labeled GPT upon import into isolated plastids, namely: precursor, weak  
363 intermediate and processed *mature* forms (Kammerer et al., 1998). Intermediates are unlikely to  
364 persist *in planta*. Thus, as deduced from the stronger labeled top bands in the *gpt2* mutants  
365 compared to Col-0 wild-type, we suppose that weak bands ~39 kDa in leaf extracts represent a

366 minor share of active *mature* GPT1 in chloroplasts (Figure 7B, lower black arrowhead), migrating  
367 between less active *mature* (estimated 36.8 kDa) and *full-length* (estimated 42.3 kDa) versions  
368 (red arrowheads). Conversely, top bands in reproductive flower and silique tissue (black  
369 arrowheads) would represent active GPT1 in the ER/peroxisomes (Figure 7B, compare Col to  
370 *gpt2-2* and *gpt2-3*). This was also observed in seedling extracts, including other transporter  
371 mutants (Figure 7C). Interestingly, the pattern of triose-phosphate/phosphate translocator  
372 mutant *tpt-5* resembled wild-type (Ws, Col), whereas unprocessed (top) bands persisted in 4  
373 week-old seedlings of OPPP-relevant mutants *xpt-2* and *gpt2-3*. However, additional treatments  
374 prior to SDS-PAGE/immuno-detection (-/+Lambda Protein Phosphatase, extraction +/-  
375 phosphatase inhibitors; Supplemental Figure 14 panels F-G) or use of 200 mM DTT for tissue  
376 extraction and sample boiling (not shown), did not result in visible differences.

377

### 378 **GPT1 is required both at plastids and peroxisomes during fertilization**

379 Loss of the last OPPP step in peroxisomes prevented formation of homozygous offspring due to  
380 mutual sterility of the *pgd2* gametophytes (Hölscher et al., 2016). In analogy to this, we set out to  
381 rescue plastidial versus ER/peroxisomal defects by ectopic *GPT* expression in heterozygous  
382 *gpt1* lines. First, the coding sequence of *GPT2* was placed under control of the constitutive  
383 mannopine synthase (*MAS*) promoter (Guevara-Garcia et al., 1993) or the *GPT1* promoter  
384 (position -1958 to -1), and introduced into heterozygous *gpt1* plants by floral dip transformation.  
385 The CaMV-35S promoter-driven *GFP-GPT1\_C-mat* construct (targeting the ER/peroxisomes,  
386 Figure 6C), was included for comparison (Supplemental Figure 15A). Obtained data showed that  
387 ectopic *GPT2* expression merely rescued the *gpt1* defect of incompletely filled siliques  
388 (Supplemental Figure 15B, panels a, b and f). When driven by the *GPT1* promoter, some  
389 siliques of the *ProGPT1:GPT2* transformed plants were completely filled with seeds  
390 (Supplemental Figure 15B, panel d), whereas most siliques of the same plant/line showed erratic  
391 seed maturation (panel c) or seed abortion (panel e). The frequencies of unfertilized, aborted  
392 ovules are compiled in Table 2. Compared to the untransformed heterozygous *gpt1-1* or *gpt1-2*  
393 lines (~30%), a slight reduction was found for *::ProMAS:GPT2* (~27%), compared to  
394 *::ProGPT1:GPT2* (~21%) and Ws wild-type (~7%), indicating some compensation by *GPT2* on  
395 the female side. Attempted ER/peroxisomal rescue by *::Pro35S:GFP-GPT1\_C-mat* scored the  
396 highest values with ~34% aborted ovules.

397 Despite occasionally filled siliques, analyses of the *ProGPT1:GPT2*-compensated lines revealed  
398 no *gpt1* homozygous plants (Table 3). Therefore, *GPT1 gpt1-2::ProGPT1:GPT2* was reciprocally  
399 crossed with ER/peroxisomal *GPT1 gpt1-2::Pro35S:GFP-GPT1\_C-mat*, forming seeds only with

400 ::*ProGPT1:GPT2* as mother plant (Table 3). Since again no homozygous *gpt1-2* alleles were  
401 found in the F<sub>2</sub>, several T<sub>2</sub> plants of ::*ProGPT1:GPT2* (line 3 #6 with ~73% filled siliques;  
402 Supplemental Figure 16A) were super-transformed with *ProGPT1:GPT1\_N-long mat*  
403 (ER/peroxisomal construct driven by the *GPT1* promoter; Supplemental Figure 16B), based on  
404 OFP-Pex16 co-expression (Figure 5C) and *GPT1-roGFP* analyses (Supplemental Figure 12),  
405 but lacking the reporter.

406 Surprisingly, siliques of heterozygous *gpt1* plants carrying *ProGPT1:GPT1\_N-long mat* (T1)  
407 were almost completely filled with seeds, irrespective of whether plastidial *ProGPT1:GPT2* was  
408 present or not (Supplemental Figure 16C, compare top to bottom panels). This indicated a major  
409 contribution by *GPT1* in the ER/peroxisomes, as also corroborated by the *gpt1* transmission  
410 rates (Table 3).

411 In summary, compared to the untransformed *GPT1 gpt1* lines (21-25%), heterozygous progeny  
412 raised only slightly upon presence of *ProGPT1*-driven *GPT2* (29-32%), with highest values  
413 scored for a *GPT1* construct lacking the transit peptide region (43%). Thus, substantial recovery  
414 by *GPT1* (solely targeting the ER/peroxisomes) was obtained without further contribution by  
415 *GPT2* (solely targeting plastids), expressed from the same promoter.

416

417

## 418 **DISCUSSION** (3196 words)

419

### 420 **GPT1 and GPT2 differ in several aspects**

421 Based on the concept that peroxisomes developed from the proto-endomembrane system of the  
422 Archaeobacterial host in an early pre-eukaryote (Tabak et al., 2006; Cavalier-Smith, 2009; van  
423 der Zand et al., 2010), and *GPT1* developed a special role related to NADPH provision by the  
424 OPPP in plastids during land plant evolution (Niewiadomski et al., 2005; Andriotis et al., 2010),  
425 as opposed to *GPT2* mainly contributing to starch biosynthesis (Athanasidou et al., 2010; Kunz et  
426 al., 2010; Dyson et al., 2015), a preexisting role of *GPT* transporters in the secretory system is  
427 conceivable. Further support for functional specialization is reflected by the late split of *GPT1*  
428 from *GPT2* sequences in dicots (Figure 8), and dichotomy of orthologous sequences in the  
429 monocot species rice (*Oryza sativa*) and maize (*Zea mays*). In rice, ADP-Glc and not G6P was  
430 shown to be imported by heterotrophic plastids as the precursor of starch biosynthesis (Cakir et  
431 al., 2016), except for pollen tissue that imports G6P (Lee et al., 2016). Furthermore, the *GPT1*-  
432 interacting oxidoreductase Grx<sub>c1</sub> (Supplemental Table 1, listed by the MIND database also as  
433 interaction partner of *GPT2*, albeit with lower score) is dicot-specific, while Grx<sub>c2</sub> is present in all

434 seed plants (Riondet et al., 2012; Li, 2014). In Arabidopsis, *GPT2* is predominately expressed in  
435 heterotrophic tissues, whereas *GPT1* is found ubiquitously (Niewiadomski et al., 2005), also in  
436 leaves (Supplemental Figure 17). Thus, basal G6P exchange, needed to stabilize the Calvin  
437 cycle in chloroplasts (Sharkey and Weise, 2016), should involve GPT1 rather than GPT2, which  
438 may be additionally induced under stress, e.g. by light (Athanasidou et al., 2010; Preiser et al.,  
439 2019).

440

#### 441 **The GPT1 N-terminus mediates dual targeting**

442 Our analyses showed that the C-terminal PTS1 motif of GPT1 is inactive, although reporter-  
443 GPT1 fusions interfered with import of the SKL-based peroxisome marker. As expected for  
444 PMPs (Rottensteiner et al., 2004), alternative GPT1 targeting was driven by other sequence  
445 motifs. The mPTS1 of class-I PMPs (directly imported into peroxisomes) comprises several  
446 positively charged amino acids on the matrix side adjacent to a transmembrane domain (Mullen  
447 and Trelease, 2006), besides a cytosolic Pex19-binding site (Rottensteiner et al., 2004; Platta  
448 and Erdmann, 2007), whereas for class-II PMPs it is only known that they exhibit an ER sorting  
449 signal (Mullen and Trelease, 2006; Eubel et al., 2008). Although the exact motif mediating ER  
450 import of GPT1 was not determined, domain swapping with GPT2 showed that the sequence  
451 must lie within the first 155 amino acids (N-terminus plus first two MDs). Since the *GPT1\_N-long*  
452 *mat* version (without TP) was inserted into the ER, the region between K48 and the first MD  
453 (A92) is probably crucial, partly lacking and strongly differing from GPT2 (Supplemental Figure  
454 1).

455 To exclude that GPT1 and GPT2 might be inserted into the ER prior to plastid import (Baslam et  
456 al., 2016) we tested Brefeldin A (BFA), a fungal toxin that inhibits the formation of ER-derived  
457 coated vesicles (Orcl et al., 1991; Klausner et al., 1992). Although BFA compartments of merged  
458 ER and Golgi vesicles were formed, GPT1 and GPT2 still localized to plastids. Furthermore, all  
459 *medial* swap constructs headed by GPT2 targeted plastids. Thus, in case of dually-targeted  
460 GPT1, threading into the plastidial Toc/Tic complex should prevent binding of the signal  
461 recognition particle (SRP) that directs proteins to the Sec61 import pore in the ER membrane  
462 (Figure 9A). Alternatively, an ER-targeting suppressor (ETS) region may be exposed by default,  
463 preventing SRP binding, as shown for human PMP70 (Sakaue et al., 2016).

464 How dual targeting to secretory versus endosymbiotic compartments may be regulated was  
465 discussed by Porter et al. (2015). N-terminal phosphorylation might influence competition  
466 between chloroplast import and SRP binding (as in case of protein disulfide isomerase RB60  
467 from *Chlamydomonas reinhardtii*). GPT1 exhibits only one potentially phosphorylated serine

468 residue in the N-terminus (S27; Supplemental Figure 1) that is conserved among all GPT  
469 sequences, albeit not listed with high score by the PhosPhAt 4.0 database (Heazlewood et al.,  
470 2008; Durek et al., 2009; Zulawski et al., 2013). Phosphomimic/preclusion of phosphorylation  
471 had no influence on dual targeting of GPT1, and neither change of the single cysteine (C65,  
472 Figure 9). On the other hand, enforced interaction of GPT1 monomers (visualized by YFP  
473 reconstitution) resulted in labeling of specific ER substructures, and the C65S change enabled  
474 detection at PerMs – as rare event (Figure 3B, panel i and 3C). However, C65 is not present in  
475 all Brassica isoforms (Supplemental Figure 1) nor in GFP-GPT1\_*C-mature*, which was detected  
476 around peroxisomes upon elicitation (Figure 6C). Thus, C65 is not essential for reaching  
477 peroxisomes, but might play a role in negative regulation of GPT1 transfer from the ER to  
478 peroxisomes.

479 In this respect, GPT1 release to peroxisomes may require interaction with Grx<sub>c1</sub> (and Trx<sub>h7</sub>),  
480 known to engage in monothiol-dithiol mechanisms, including glutathionylation (Riondet et al.,  
481 2012; Ukuwela et al., 2018). The latter is known to be triggered by oxidative transients that  
482 accompany stress signaling and developmental change (2GSH→GSSG). Sensible cysteine  
483 residues (-S<sup>-</sup> at physiological pH) may become sulfenylated (-S-OH in the presence of H<sub>2</sub>O<sub>2</sub>) or  
484 glutathionylated (-S-SG), which protects from over-oxidation (reviewed in Zaffagnini et al., 2019).  
485 Reversion (de-glutathionylation) by GSH alone is slow, but fast together with Grx and Trx (as  
486 recently shown for plastidial Amy3; Gurrieri et al., 2019). Perhaps this mechanism regulates  
487 GPT1 interaction with Pex16 and/or Pex3, given that biochemically distinct ER vesicles were  
488 shown to fuse and form new peroxisomes (Van Der Zand et al., 2012). In any case, GPT1  
489 transport in monomeric form within the ER makes sense, since a potentially active translocator -  
490 still *en route* to its final destination - is likely not tolerated. This idea is supported by aberrant ER  
491 structure in analyses with enforced GPT1-dimer formation (Figure 3).

492

### 493 **Evidence for redox transmitters in GPT1 recruitment to the ER/peroxisomes**

494 For indirect delivery of PMPs via the ER, it is still unclear how the processes of ER targeting and  
495 sorting to newly forming peroxisomes are regulated. For Pex3 it was suggested that cytosolic  
496 chaperons may guide the protein to the Sec61 translocon (Kim and Hettema, 2015), and for  
497 Pex16 that the protein may recruit Pex3 and other PMPs to the ER (Hua et al., 2015). We  
498 already published on the importance of thioredoxins as redox-dependent targeting regulators for  
499 OPPP enzymes before. Since Trx co-chaperon function (*holdase* versus *foldase*) depends on  
500 the local redox state, dual targeting of Arabidopsis G6PD1 and PGL3 is regulated by either  
501 preventing folding, allowing plastid import, or supporting folding, as pre-requisite for peroxisome

502 import (Meyer et al., 2011; Hölscher et al., 2014). Here we show that co-expression of GPT1  
503 with the cytosolic oxidoreductases Trx<sub>h7</sub> or Grx<sub>c1</sub> enhanced ER localization. Moreover, GPT1  
504 interaction with both oxidoreductases was spotted at structures reminiscent of PerMs.  
505 Thioredoxins and glutaredoxins were previously reported to promote protein folding directly, via  
506 protein-disulfide reduction or disulfide-bond formation (Berndt et al., 2008), besides enhancing  
507 co-chaperon activities in a redox state-dependent manner. Both, *foldase* function of the  
508 monomeric thioredoxin and *holdase* function in the oligomeric state, prevented  
509 folding/aggregation of client proteins, as demonstrated for Trx *h* and *m* types (Park et al., 2009;  
510 Sanz-Barrio et al., 2012). The oligomerization state of Grx<sub>c1</sub> was also shown to be influenced by  
511 the surrounding redox medium, and conversely activated under oxidizing conditions, implying a  
512 function as cytosolic redox sensor (Riondet et al., 2012; Ströher and Millar, 2012). Considering  
513 that Grx and Trx serve as electron donors for peroxiredoxins that detoxify H<sub>2</sub>O<sub>2</sub> directly (Dietz,  
514 2011), and regulation of *h*-type Trx via Grx<sub>c1</sub> was demonstrated previously (Meng et al., 2010;  
515 Rouhier, 2010), a complex co-regulation of the two protein classes exists in plant cells.  
516 Furthermore, Trx<sub>h7</sub> and Grx<sub>c1</sub> were found to be N-myristoylated *in planta* (Meng et al., 2010;  
517 Riondet et al., 2012; Traverso et al., 2013; Majeran et al., 2018). For Grx<sub>c1</sub>, which had been  
518 detected in the cytosol and nucleus before (Riondet et al., 2012), our results show that the  
519 protein partially resides at the ER. Grx<sub>c1</sub> promoted ER targeting of GPT1, also without N-  
520 myristoylation motif (G2A) in *grx<sub>c1</sub>* mutant protoplasts (not shown), indicating functional  
521 redundancy with (an)other isoform/member(s) of the Grx/Trx superfamily. Interestingly, GPT1 is  
522 listed as palmitoylation candidate by the plant membrane protein database Aramemnon  
523 (<http://aramemnon.uni-koeln.de>) with high score. Protein S-acylation (via cysteine residues) is  
524 still a poorly understood posttranslational process that is usually preceded by N-myristoylation,  
525 to promote membrane association, targeting, and/or partitioning into membrane subdomains  
526 (Aicart-Ramos et al., 2011; Hemsley, 2015). A potential role of Grx/Trx N-myristoylation for  
527 putative S-palmitoylation of GPT1 will have to be analyzed by a complex experimental setup, a  
528 difficult task considering partial redundancy among cytosolic Trx *h2*, *h7*, *h8*, *h9* as well as Grx *c1*  
529 and *c2* isoforms (Riondet et al., 2012; Traverso et al., 2013; Majeran et al., 2018). Clearly, GPT1  
530 is inserted into the ER membrane in monomeric form, and may be modified at C65 (Figure 9A,  
531 question mark) for retention. Dimer formation beyond the perER would occur after de-protection,  
532 likely triggered by cytosolic redox signaling that accompanies a/biotic stress responses  
533 (Vandenabeele et al., 2004; Foyer et al., 2009) or specific developmental stages, like pollen tube  
534 elongation (Considine and Foyer, 2014) and navigation to ovules (Hölscher et al., 2016).

535

536 **GPT1 behaves like a class-II PMP**



537 Our BiFC data suggested that GPT1 contacts at least two of the three early peroxins (Kim and  
538 Mullen, 2013). Interaction with Pex3 and Pex16 was detected at the ER and PerMs, whereas  
539 interaction with Pex19 was mostly distributed across the cytosol, reflecting its function as  
540 cytosolic cargo receptor (Hadden et al., 2006). Since simple co-expression with Pex19-reporter  
541 fusions did not show any change in GPT1 localization, dot-like structures labeled by GPT1-  
542 Pex19 BiFC analyses might be a false-positive result. This would be in line with Pex19 being  
543 mainly involved in targeting of class I, but not class II PMPs. Focal localization of GPT1 at the  
544 ER, previously described for Pex3 in yeast and for pxAPX in cottonseed/APX3 in Arabidopsis  
545 (Lisenbee et al., 2003; Narendra et al., 2006), was mainly seen upon BiFC, indicating that  
546 dimerization occurs beyond the perER. GPT1 dimers may therefore represent a forced  
547 interaction at the ER, which does not (yet) occur under physiological conditions. As a side note,  
548 Pex3 of plant cells had not been detected at the ER before (Hunt and Trelease, 2004).

549 Usually, GPT1 distributed evenly across the ER, unless co-expressed with Pex16 that coexists  
550 at both the ER and PerMs (Lin et al., 2004; Karnik and Trelease, 2005). Interestingly, presence  
551 of Pex16 influenced GPT1 localization at the ER, resulting in a similar but distinct pattern – also  
552 when driven by the own promoter (dark incubation in the presence of sugars activates *GPT1*  
553 mRNA expression, Supplemental Figure 18). Considering that BiFC is not dynamic, and fluores-  
554 cent signals persist once the split YFP halves are reconstituted (Robida and Kerppola, 2009),  
555 GPT1 was likely dragged to PerMs upon (otherwise transient) interaction with the peroxins. In  
556 any case, this demonstrated that GPT1 can reach PerMs (although not detected there, unless  
557 triggered), wherefore the transporter may first interact with Pex16 (for ER insertion/transport to  
558 the perER; Hua et al., 2015), and then Pex3 (and possibly Pex19, during sorting to PerMs). By  
559 contrast to APX3, GPT1 is only needed at peroxisomes when the OPPP is required (Meyer et  
560 al., 2011; Hölscher et al., 2014; Lansing et al., 2019). Of note, aside from continuously imported  
561 PGD2, no other OPPP enzyme has been found by peroxisomal proteomics so far (see Hölscher  
562 et al., 2016; Lansing et al., 2019 and references cited therein).

563

## 564 **GPT1 transport preference differs from GPT2**

565 After plastid import, TP sequences are cleaved off by the essential stromal processing peptidase  
566 (SPP), which is usually important for maturation, stabilization, and activation of the proteins (van  
567 Wijk, 2015). Here we show that also unprocessed GPT1 is an active transporter. Addition of a  
568 small tag or large reporter did not influence transport activity. Furthermore, topology analyses of  
569 *roGFP* fusions indicated that upon ER insertion, both N- and C-termini of GPT1 face the cytosol  
570 (Supplemental Figure 12), similar to Arabidopsis PMP22 (Murphy et al., 2003) and the human

571 glucose transporter (Mueckler and Lodish, 1986). These findings support the theory of Shao and  
572 Hegde (2011) that during post-translational ER import of membrane proteins, type-I topology (N-  
573 terminus facing the lumen) is strongly disfavored. This leads to obligate type-II topology (N-  
574 terminus facing the cytosol), and integration of the following MDs owing to the ‘positive inside  
575 rule’ (von Heijne, 1986; Goder et al., 2004) for the cytosolic hinge regions. The latter is not  
576 entirely true for the GPT proteins (marked red in Supplemental Figure 1 and the topology  
577 models), which may facilitate posttranslational ER insertion.

578 The phosphate translocator family is known to form dimers that mediate strict counter-exchange  
579 of various phosphorylated metabolites with inorganic phosphate (Pi). The ability to transport  
580 other OPPP intermediates, although possible (e.g. triose-phosphates), is usually disfavored due  
581 to the prevailing metabolite concentrations or competition with the preferred substrate (Flügge,  
582 1999; Eicks et al., 2002). Here we show that GPT1 and GPT2 can exchange G6P for Ru5P, but  
583 GPT1 has a stronger preference for Ru5P. Thus, import of the OPPP substrate and export of its  
584 product is warranted across PerMs (Figure 9B). Moreover, poor rates obtained with 6-phospho-  
585 gluconate (6PG) as counter-exchange substrate strongly suggest that sugar-derived NADPH  
586 production occurs by all three OPPP steps (Meyer et al., 2011; Hölscher et al., 2014; Lansing et  
587 al., 2019), making a short-cut via solely Arabidopsis PGD2, catalyzing the last OPPP step in  
588 peroxisomes (Fernández-Fernández and Corpas, 2016; Hölscher et al., 2016), unlikely.

589 In principle, the discovered transport preference should also apply to metabolite exchange at  
590 plastids. This may explain why Arabidopsis *tpt xpt* double mutants are viable (although strongly  
591 growth-compromised; Hilgers et al., 2018) and why *rpi2* mutants, lacking one of the two cytosolic  
592 ribose-phosphate isomerase (RPI) isoforms form less starch in leaves (Xiong et al., 2009).  
593 Minute amounts of active GPT1 could drain G6P from chloroplasts due to preferred exchange  
594 with Ru5P, likely more abundant in *rpi2* mutants (Supplemental Figure 19). Besides G6P  
595 exchange needed to stabilize the Calvin cycle (Sharkey and Weise, 2016), this argues for a role  
596 of ubiquitously expressed GPT1, considering that GPT2 is absent from unstressed leaves  
597 (Supplemental Figure 14F). On the other hand, lower transport capacity of GPT1 compared to  
598 GPT2 is not surprising, since our data confirm a specialization of the two transporters. For  
599 GPT1’s function, flux rates are not necessarily a limiting parameter, but substrate specificity  
600 obviously is. This is in line with our complementation analyses, demonstrating that GPT2 cannot  
601 compensate for the absence of GPT1.

602

603 **Dual targeting of GPT1 is essential during fertilization**

604 Niewiadomski et al. (2005) and Andriotis et al. (2010) found that loss of GPT1 function in  
605 plastids strongly affects pollen maturation and embryo-sac development, resulting in aberrant  
606 morphological changes. Interestingly, in plants with reduced GPT1 levels, embryo development  
607 is normal up to the globular stage, but then embryos fail to differentiate further and accumulate  
608 starch (Andriotis et al., 2010; Andriotis and Smith, 2019). According to the Arabidopsis eFP  
609 Browser (Winter et al., 2007), in this stage mRNA expression of *GPT2* is up to 3.5-fold higher  
610 than of *GPT1* (Supplemental Figure 17), which can explain the observed starch accumulation  
611 upon GPT1 loss.

612 In accordance with these premises, we suspected that ectopic *GPT2* expression may rescue  
613 some plastidial functions, but not all phenotypes of the mutant *gpt1* alleles, because swap  
614 constructs headed by GPT2 were never detected at the ER. For heterozygous *gpt1-2*  
615 transformed with *GPT2* (driven by the *GPT1* promoter), filled siliques with green, non-aborted  
616 embryos, and fertilized, but later aborted brownish embryos were observed. Plants homozygous  
617 for the *gpt1-2* T-DNA were absent from the progeny of this line and also from ER/peroxisomal  
618 compensated *Pro35S:GFP-GPT1\_C-mat*.

619 Upon reciprocal crossing of these two lines, only one direction worked (Table 3), indicating that  
620 besides partial rescue of the female *gpt1* defects (showing as filled siliques), plastid-confined  
621 GPT2 was unable to fully rescue GPT1's functions during pollen maturation/tube growth. Pollen  
622 grains appeared normal, but no homozygous *gpt1-2* plants were found among the progeny of  
623 combined complementation constructs. This suggested that the remaining defects result mainly  
624 from absence of GPT1 from plastids, due to a unique function GPT2 cannot fulfill. Furthermore,  
625 GPT1 transfer from the ER to peroxisomes might be impeded by artificial construct composition.  
626 Of note, *Pro35S:GFP-GPT1\_C-mat* (transport-competent ER/PerM control) did not rescue ovule  
627 abortion (Table 2), but led to a substantial increase in heterozygous offspring compared to the  
628 parental line (Table 3). This may be even an underestimation, since the CaMV-35S promoter is  
629 not well expressed in pollen, and generally fluctuates in floral tissues (Wilkinson et al., 1997). By  
630 contrast, the *ProGPT1*-driven *GPT1\_N-long mat* construct (without TP) rescued seed set and  
631 raised *gpt1* transmission up to 43%, independent of additional GPT2 in plastids. Thus, together  
632 with the pollination defect (mentioned above) and complementation by a genomic *GPT1*  
633 construct (Niewiadomski et al., 2005), our results indicate that for full rescue GPT1 is additionally  
634 needed in plastids, where the OPPP is mainly required for Ru5P provision to nucleotide bio-  
635 synthesis (Figure 9B), as recently shown by Andriotis and Smith (2019).

636 The findings nicely support our previous analyses that loss of Ru5P formation in peroxisomes  
637 (by missing PGD2 activity; Hölscher et al., 2016) prevents homozygous offspring due to mutual  
638 sterility of the male and female *pgd2* gametophytes. Moreover, the low transport rates for 6PG

639 and redundancy at the PGL step in Arabidopsis (Lansing et al., 2019) suggest that no other  
640 OPPP intermediate is transported across PerMs. Transport preference for Ru5P may also  
641 explain why GPT1 is indispensable in heterotrophic plastids (Figure 9B), probably accepting Pi  
642 released by GPT2-driven starch synthesis as counter-exchange substrate. Finally, dual targeting  
643 is supported by immuno-detection of unprocessed (ER/peroxisomal) GPT1 in flower/silique and  
644 seedling tissues. In the latter, a shift in the GPT1 pattern seems to reflect gradual adaptation to  
645 the photoautotrophic state. Besides, relative mobility and band intensities in wild-type versus  
646 *gpt2* (and other transporter mutants) indicates that GPT1 transport activity may be regulated by  
647 post-translational modification at both locations, perhaps phosphorylation of the mature protein  
648 part (up to 5 sites; Supplemental Figure 1, blue frames). Potential glutathionylation (300 Da) of  
649 the single cysteine in the GPT1 N-terminus (C65; Figure 9A) cannot explain the observed size  
650 shifts, rather palmitoylation (Greaves et al., 2008). Of note, S-palmitoylation is usually preceded  
651 by N-myristoylation (Wang et al., 1999), and both Grx<sub>c1</sub> and Trx<sub>h7</sub> were found to be N-  
652 myristoylated *in planta* (Majeran et al., 2018). For sure Grx isoforms are important during  
653 fertilization, since *grx<sub>c1</sub> grx<sub>c2</sub>* double mutants exhibited a lethal phenotype early after pollination  
654 (Riondet et al., 2012). Together, this may add to the recently discovered role of palmitoylation  
655 during male and female gametogenesis in Arabidopsis (Li et al., 2019). However, a definite link  
656 of these aspects to dual targeting of GPT1 will require more detailed studies.

657  
658 In summary, our data present compelling evidence for dual targeting of GPT1 to both plastids  
659 and peroxisomes. Imported G6P is converted by the oxidative OPPP part to NADPH and Ru5P,  
660 which is the preferred exchange substrate (likely at both locations), thus contributing to  
661 gametophyte and embryo development as well as pollen-tube guidance to ovules. Since the  
662 latter dominates the reproductive success, further analyses are required to determine the exact  
663 physiological context of GPT1's presence at the ER/peroxisomes.

664

665

## 666 **MATERIALS AND METHODS** (1704 words)

667

### 668 **Bioinformatics**

669 For general information about *Arabidopsis thaliana*, the TAIR website ([www.arabidopsis.org](http://www.arabidopsis.org)),  
670 Araport ([www.araport.org](http://www.araport.org)), PhosPhAt 4.0 (<http://phosphat.uni-hohenheim.de/>), and the National  
671 Center for Biotechnology Information (NCBI) ([www.ncbi.nlm.nih.gov](http://www.ncbi.nlm.nih.gov)) were consulted. Routine  
672 analyses were performed with programs of the ExPASy proteomics server ([www.expasy.ch](http://www.expasy.ch)) and

673 Clustal Omega ([www.ebi.ac.uk](http://www.ebi.ac.uk)). For the phylogenetic tree, sequence information on different  
 674 higher plant clades was retrieved from the National Center for Biotechnology Information (NCBI;  
 675 [www.ncbi.nlm.nih.gov](http://www.ncbi.nlm.nih.gov)), and for the moss *Physcomitrella patens* from [www.cosmoss.org](http://www.cosmoss.org).  
 676 Sequence alignments and phylogenetic analyses were performed in MEGA7 (Jones et al., 1992;  
 677 Kumar et al., 2016) using the Maximum Likelihood method based on the JTT matrix-based  
 678 model (Jones et al., 1992).

679

## 680 Cloning of Fluorescent Reporter Fusions

681 Open reading frames of candidate genes were obtained by RT-PCR using Arabidopsis total leaf  
 682 RNA as described in Hölscher et al. (2016), except for Trx<sub>h7</sub> which was amplified from genomic  
 683 DNA. Appropriate oligonucleotide primers are listed in Supplemental Table 2. Reporter  
 684 constructs were cloned in plant expression vectors as described before (Meyer et al., 2011;  
 685 Hölscher et al., 2016) and indicated in the table below.

686

| <b>Reporter vector</b>        | <b>Sites for N-terminal fusions</b> | <b>Sites for C-terminal fusions</b> |
|-------------------------------|-------------------------------------|-------------------------------------|
| pGFP2*                        | XbaI (SpeI), Acc65I                 | [not used]                          |
| pGFP2-ΔNcoI*                  | XbaI, Acc65I                        | [not used]                          |
| pOFP-ΔNcoI*<br>(pSY526)       | EcoRI, NcoI                         | SpeI, BamHI                         |
| pGFP2-SDM*                    | XbaI, Acc65I                        | SpeI, BamHI                         |
| pG/OFP-NX*                    | XbaI, NcoI, Acc65I                  | SpeI, BamHI                         |
| pUC-SPYNE<br>pUC-SPYCE(M)     | SpeI, Acc65I, BamHI                 | [not used]                          |
| pUC-SPYNE(R)<br>pUC-SPYCE(MR) | [not used]                          | SpeI, BamHI                         |

687 \*For vector details see (Meyer et al., 2011; Hölscher et al., 2016); split YFP vectors (Walter et al., 2004)

688

## 689 Site-directed Mutagenesis

690 Single base changes, for destroying restriction sites or changing amino acids, were introduced  
 691 by the Quick-Change PCR mutagenesis kit protocol (Stratagene), using the primer combinations  
 692 listed in Supplemental Table 2 and Phusion™ High-Fidelity DNA Polymerase (Finnzymes). All  
 693 base changes were confirmed by sequencing.

694

## 695 Heterologous Protein Expression in Yeast Cells

696 For in vitro-uptake studies, *full-length* or *mature* GPT1 and GPT2 versions were amplified with  
 697 the corresponding primers from cDNA and inserted into yeast vectors pYES2 or pYES-NTa via

698 Acc65I (KpnI)/BamHI sites (Thermo Scientific). For *full-length* GPT1, primer combinations were  
699 GPT1\_Acc65I\_s with GPT1+S\_BamHI\_as; for *mature* GPT1, GPT1\_C-mat\_Acc65I\_s with  
700 GPT1+S\_BamHI\_as; and for *mature* GPT2, GPT2\_C-mat\_Acc65I\_s with GPT2+S\_BamHI\_as  
701 (Supplemental Table 2). For the GFP-GPT1\_C-mat version, PCR fragments (primers: GPT1\_C-  
702 mat\_SpeI\_s and GPT1+S\_BamHI\_as) were first inserted into pGFP2-SDM via SpeI/BamHI  
703 sites, released with KpnI/BamHI, and cloned in pYES2. The resulting constructs were  
704 transformed into strain INVSc1 (MAT $\alpha$ , his3 $\Delta$ 1, leu2, trp1-289, ura3-52/MAT $\alpha$ , his3 $\Delta$ 1, leu2, trp1-  
705 289, ura3-52) using the lithium acetate/PEG method (Gietz and Schiestl, 2007). Yeast cells were  
706 selected on synthetic complete medium (SC-Ura; 0.67% (w/v) YNB supplemented with  
707 appropriate amino acids and bases for uracil auxotrophy and 2% (w/v) glucose as carbon  
708 source). Since protein expression is under control of the galactose-inducible promoter pGAL1,  
709 yeast cells were grown aerobically in SC-Ura supplemented with 2% (w/v) galactose for 6 h at  
710 30°C. Harvest and enrichment of total yeast membranes without and with recombinant GPT  
711 proteins was performed according to Linka et al. (2008).

712

### 713 **Uptake Studies Using Proteoliposomes**

714 Yeast membranes were reconstituted into 3% (w/v) L- $\alpha$ -phosphatidylcholine by a freeze-thaw-  
715 sonication procedure for in vitro-uptake studies as described in Linka et al. (2008). Proteolipo-  
716 somes were either preloaded with 10 mM KPi, G6P, Ru5P, 6PG or produced without pre-loading  
717 (negative control). Counter-exchange substrate not incorporated into proteoliposomes was  
718 removed via gel filtration on Sephadex G-25M columns (GE Healthcare). Transport assays were  
719 started either by adding 0.2 mM [ $\alpha$ -<sup>32</sup>P]-phosphoric acid (6,000 Ci/mmol) or 0.2 mM [<sup>14</sup>C]-  
720 glucose-6-phosphate (290 mCi/mmol). The uptake reaction was terminated by passing  
721 proteoliposomes over Dowex AG1-X8 anion-exchange columns. The incorporated radiolabeled  
722 compounds were analyzed by liquid scintillation counting. Time-dependent uptake data were  
723 fitted using nonlinear regression analysis based on one-phase exponential association using  
724 GraphPad Prism 5.0 software (GraphPad, www.graphpad.com). The initial uptake velocities  
725 were calculated using the equation slope = (Plateau - Y0)\*k, whereas Y0 was set to 0. The  
726 values for the plateau and k were extracted from the non-linear regression analyses using a  
727 global fit from three technical replicates.

728

### 729 **Arabidopsis Mutants**

730 Heterozygous *gpt1-1* and *gpt1-2* lines (Arabidopsis ecotype Wassilewska, Ws-2) were kindly  
731 provided by Anja Schneider (LMU Munich) and analyzed via PCR amplification from genomic

732 DNA as suggested for the two T-DNA alleles (Niewiadomski et al., 2005). All oligonucleotide  
733 primers are listed in Supplemental Table 2. For the Feldman line, primers  
734 GPT1\_EcoRI\_s/GPT1-R5 were used for the wild-type allele, and F-RB/GPT1-R5 (Niewiadomski  
735 et al., 2005) for the *gpt1-1* T-DNA allele. For the Arabidopsis Knockout Facility (AKF) line,  
736 primers GPT1-F3/GPT1-R3 were used for the wild-type allele, and GPT1-F3/JL-202  
737 (Niewiadomski et al., 2005) for the *gpt1-2* T-DNA allele. To improve PCR analyses, GPT1-F3  
738 was later replaced by primer *gpt1-2\_WT\_s*. Further mutants used were *gpt2-2* (GK-950D09),  
739 *gpt2-3* (GK-780F12), and *xpt-2* (SAIL\_378C01) in the Columbia (Col) background, and *tpt-5*  
740 (FLAG\_124C02) in the Ws background. Mutant plants were identified by genomic PCR using the  
741 suggested gene-specific and T-DNA-specific primer combinations (Supplemental Table 2).

742

### 743 **Plant Growth**

744 Arabidopsis seeds were surface-sterilized by ethanol washes (vortexed for 5 s each in 70%  
745 EtOH, EtOH absolute, 70% EtOH), dried on sterile filter paper, and spread on sterile germination  
746 medium (0.5 Murashige & Skoog salt mixture with vitamins, pH 5.7-5.8, 0.8% agar; Duchefa,  
747 Haarlem, NL) supplemented with 1% sucrose and stratified for 2-3 days at 4°C. After  
748 propagation in growth chambers for one week (short day regime: 8 h light 21°C, 16 h dark 19°C)  
749 seedlings were transferred to sterile Magenta vessels (Sigma) and grown for 4-5 weeks until  
750 harvesting rosette leaves for protoplast isolation. Alternatively, seedlings were transferred to  
751 fertilized soil mix at the 4-leaf stage and grown in short day regime, prior to transfer to long day  
752 regime (16 h light 21°C, 8 h dark 19°C) to promote flowering. In case of tobacco (*Nicotiana*  
753 *tabacum* var. Xanthi), sterile apical cuttings were cultivated on MS agar supplemented with 2%  
754 sucrose. The top leaves of four week-old plants were used for protoplast isolation.

755

### 756 **Protoplast Transfection and Microscopy**

757 Localization of fluorescent reporter fusions (all constructs driven by the CaMV-35S promoter, if  
758 not indicated otherwise) was determined by confocal laser scanning microscopy (CLSM) in  
759 freshly transfected mesophyll protoplasts (Meyer et al., 2011). For co-expression analyses,  
760 25 µg of test DNA (BiFC: 20 µg of each plasmid) was pre-mixed with 5 µg of a reporter construct  
761 (20 µg in case of Pex16-OFP) prior to PEG transfection. After cultivation for 12 to 48 h at 21-  
762 25°C in the dark (without or with the drug/elicitor indicated), fluorescent signals were recorded  
763 using a Leica TCS SP5 microscope with excitation/emission wavelengths of 405 vs. 488/490-  
764 520 nm for *roGFP*, 488/490-520 nm for *GFP*, 514/520-550 nm for *YFP*, and 561/590-620 nm for  
765 *OFP (mRFP)*.

766

## 767 **Immunoblot analyses**

768 Arabidopsis tissues were harvested from plants grown in soil, or seedlings growing on  
769 germination plates (1% sucrose) after different time points. Our standard protein-extraction  
770 buffer was 50 mM HEPES-NaOH pH 7.5, 2 mM sodium pyrosulfite ( $\text{Na}_2\text{S}_2\text{O}_5$ ), 1 mM Pefabloc  
771 SC, Protease Inhibitor Cocktail (1:100) for use with plant extracts (Sigma), and 280 mM  
772  $\beta$ -mercaptoethanol ( $\beta$ -ME) - if not stated otherwise. Immunoblot analyses were conducted as  
773 described previously (Meyer et al., 2011; Hölscher et al. 2016; Lansing et al., 2019) using 10%  
774 separating gels with 10% glycerol. Polyclonal rabbit antisera were obtained from Eurogentec  
775 (Seraing, B), raised against the N-terminal GPT sequences (91 amino acids of GPT1 or 92  
776 amino acids of GPT2) with His tag as antigen (His-N1, His-N2) after overexpression in *E. coli*  
777 BL21 from pET16b-based plasmids and affinity purification via Ni-NTA (Qiagen), followed by  
778 specificity tests (Supplemental Figure 14).

779

## 780 **GPT Constructs for Rescue Analyses**

781 For one of the plastidial rescue lines, expression from the Mannopine synthase promoter was  
782 used (pBSK-pMAS-T35S, Supplemental Figure 20). The ORF of GPT2 was amplified from  
783 cDNA with primer combination GPT2\_s\_EcoRI/GPT2\_as\_PstI (all primers are listed in  
784 Supplemental Table 2) and inserted into pBSK-pMAS-T35S via EcoRI/PstI sites (pBSK-  
785 pMAS:GPT2). The entire expression cassette (pMAS:GPT2-T35S) was released with Sall/XbaI  
786 and inserted into binary vector pGSC1704-HygR (*ProMAS:GPT2*). For *GPT1* promoter-driven  
787 *GPT2*, the 5' upstream sequence of *GPT1* (position -1 to -1958) was amplified from genomic  
788 DNA using Phusion<sup>TM</sup> High-Fidelity DNA Polymerase (Finnzymes) and inserted blunt end into  
789 pBSK via EcoRV (orientation was confirmed by sequencing). The GPT2-T35S part was  
790 amplified with primers GPT2\_NdeI\_s/T35S\_Sall\_as from pBSK-pMAS:GPT2 and inserted  
791 downstream of the *GPT1* promoter via NdeI/Sall in pBSK. The final expression cassette  
792 (*ProGPT1:GPT2-T35S*), amplified with primers pGPT1\_s/T35S\_Sall\_as, was digested with Sall,  
793 and inserted into pGSC1704-HygR via SnaBI/Sall sites.

794 For the CaMV promoter-driven *35S:GFP-GPT1\_C-mat* construct, the expression cassette was  
795 released from vector pGFP2-SDM with PstI/EcoRI, the EcoRI site filled (using Klenow Fragment,  
796 Thermo Fisher) and inserted into binary vector pGSC1704-HygR via SdaI/SnaBI sites. For  
797 *GPT1\_N-long mat* (also driven by the *GPT1* promoter), fragments were amplified with primers  
798 GPT1\_long mat-s and G6P\_peroxi\_Trans\_full\_BamHI from existing cDNA clones upon insertion  
799 into the pGFP-NX backbone via XbaI and BamHI (removing GFP). The *GPT1* promoter was



800 then amplified with primers P\_GPT1\_s and P\_GPT1\_as and inserted via PstI/SpeI into PstI/XbaI  
801 in the target plasmid, replacing the CaMV-35S promoter. The resulting cassette with *GPT1*  
802 promoter, *GPT1*\_N-long mat and *NOS* terminator was then amplified via primers P\_GPT1\_s and  
803 NosT\_as upon Sall digestion and insertion into Sall and SnaBI-opened binary vector pDE1001  
804 (Ghent University, B).

805 All binary constructs were transformed into *Agrobacterium* strain GV2260 (Scharte et al., 2009).  
806 Floral dip transformation of heterozygous *gpt1* plants was conducted as described by Clough  
807 and Bent (1998). Seeds were selected on germination medium containing 15 µg ml<sup>-1</sup> Hygromycin  
808 B (Roche) or 50 µg ml<sup>-1</sup> Kanamycin (*ProGPT1-GPT1*\_N-long mat) including 125 µg ml<sup>-1</sup> Beta-  
809 lactyl (SmithKline Beecham), and transferred to soil at the 4-leaf stage. After three weeks, wild-  
810 type and T-DNA alleles were genotyped as described above. *ProMAS:GPT2* and  
811 *ProGPT1:GPT2* constructs were amplified from genomic DNA using primers GPT2\_C-  
812 4MD\_SpeI\_s and T35S\_Sall\_as. For testing presence of *Pro35S:GFP-GPT1*\_C-mat, primer  
813 combinations P35S\_s and GPT1\_EcoRI\_as or NosT\_as were used. Presence of  
814 *ProGPT1:GPT2* was detected with primers GPT2\_XbaI\_s and GPT2-Stop\_BHI\_as  
815 (discrimination between the cDNA-based complementation construct and wild-type sequence is  
816 based on size, i.e. absence or presence of introns), while *GPT1*\_N-long mat was detected with  
817 primers GPT1\_long mat\_s and NosT\_as".

818

### 819 **Determination of Ovule-Abortion Frequencies**

820 Siliques number 10 to 12 of the main inflorescence (counted from the top) were harvested and  
821 incubated in 8 M NaOH overnight. Images of bleached and unbleached siliques were recorded  
822 with transmitting light using a Leica MZ16 F stereo microscope connected to a Leica DFC420 C  
823 camera. Aborted ovules were counted and frequencies were calculated.

824

### 825 **Acknowledgements** (135 words)

826 The authors thank Anja Schneider (LMU Munich) for providing the heterozygous *gpt1* lines, and  
827 the Arabidopsis Stock Centers (NASC, INRA) for the other mutant lines. Andreas Meyer (INRES,  
828 University of Bonn) donated the *roGFP2* plasmid, and Robert Marschall (IBBP) helped with  
829 ratiometric analyses in ImageJ. Stephan Rips gave advice on CLSM imaging, Olessia Becker  
830 was involved in GPT antigen production/antibody testing, Sebastian Hassa cloned expression  
831 vector pBSK:pMAS-T35S, Lennart Doering finished the *GPT1*-C65S split YFP constructs, and  
832 Wiltrud Krüger helped with routine lab work. Several Bachelor students contributed by their  
833 thesis projects: Jan Wiese by ribose-phosphate epimerase (RPE) isoform analyses, Margareta

834 Westphalen to BiFC interaction analyses, and Hinrik Plaggenborg to roGFP topology analyses.  
835 This work was in part funded by the German Research Foundation (DFG) via grants SCHA  
836 541/12 (to AvS) and LI 1781/1-3 (to NL).

837

### 838 **Author contributions**

839 M-CB, HL, KF, TM, LC, and NL performed the experiments; AvS, M-CB, HL, and NL designed  
840 experiments and analyzed the data; M-CB, HL, and AvS wrote the manuscript; all authors read  
841 and approved the final version of the article.

842

### 843 **Conflict of interest**

844 The authors declare no conflict of interest.

845

846

### 847 **Supplemental Data**

848 The following supplemental materials are available online.

849

### 850 **Supplemental Tables**

851 **Supplemental Table 1.** GPT1 search results of the Membrane-based Interactome Network Database  
852 (MIND).

853 **Supplemental Table 2.** Oligonucleotide primers used in this study.

854 **Supplemental Table 3.** Protein sequences used for calculating the phylogenetic tree.

855

### 856 **Supplemental Figures**

857 **Supplemental Figure 1.** Alignment of GPT1 and GPT2 polypeptide sequences from six  
858 *Brassicaceae*.

859 **Supplemental Figure 2.** Localization of N-terminally truncated and full-length reporter-GPT  
860 fusions.

861 **Supplemental Figure 3.** Single channel images of Figure 1.

862 **Supplemental Figure 4.** Localization of C-terminally truncated GPT-reporter fusions.

863 **Supplemental Figure 5.** Localization of two different GPT1 and GPT2 *medial* reporter fusions.

864 **Supplemental Figure 6.** Brefeldin-A treatment of the *medial* GPT\_2MD:8MD fusions.

865 **Supplemental Figure 7.** Single channel images of Figure 2.

866 **Supplemental Figure 8.** Single channel images of Figure 3.

867 **Supplemental Figure 9.** Tr<sub>X<sub>h7</sub></sub> and Gr<sub>X<sub>c1</sub></sub> partially localize at the ER (together with GPT1).

868 **Supplemental Figure 10.** OFP fusions of Pex3-1, Pex16, Pex19-1 and co-expression with  
869 GFP-GPT1.

870 **Supplemental Figure 11.** Single channel images of Figure 5C (*Pro35S* vs. *ProGPT1* promoter).

871 **Supplemental Figure 12.** Ratiometric topology analysis of GPT1 at the ER using *roGFP*.

872 **Supplemental Figure 13.** Single channel images of Figure 7A.

873 **Supplemental Figure 14.** Generation and test of the polyclonal rabbit GPT1 antiserum.

874 **Supplemental Figure 15.** Ectopic *GPT2* expression for plastidial rescue in heterozygous *gpt1* lines.

875 **Supplemental Figure 16.** ER/peroxisomal rescue of GPT1 function in heterozygous *gpt1-2*.

876 **Supplemental Figure 17.** Relative mRNA-expression levels of Arabidopsis *GPT1* and *GPT2*.

877 **Supplemental Figure 18.** *GPT1* mRNA expression is induced by sucrose in low light/darkness.

878 **Supplemental Figure 19.** Possible consequences of G6P-Ru5P exchange by GPT1 at  
879 chloroplasts.

880 **Supplemental Figure 20.** Vector map of pBSK-pMAS-T35S.

881

882

883

884 **Tables** (601 words)

885

886 **Table 1. Initial velocities of Pi or G6P import for various exchange substrates.**

887 Time-dependent uptake of [<sup>32</sup>P]-Pi or [<sup>14</sup>C]-G6P (0.2 mM) into liposomes reconstituted with total  
888 yeast membranes of cells expressing the indicated *mature* GPT versions (nmol mg<sup>-1</sup> total  
889 protein). Proteoliposomes were preloaded with 10 mM G6P, Ru5P, 6PG, or Pi. Relative  
890 velocities given in brackets were compared to the counter-exchange experiment Pi/G6P or  
891 G6P/Pi, which was set to 100%.

892

|                   |             | <b>His-matGPT1</b>  | <b>His-matGPT2</b>  |
|-------------------|-------------|---------------------|---------------------|
| <b>Pi versus</b>  | <b>G6P</b>  | <b>9.9</b> (100 %)  | <b>19.3</b> (100 %) |
|                   | <b>Ru5P</b> | <b>5.8</b> ( 59 %)  | <b>14.4</b> ( 75 %) |
|                   | <b>6PG</b>  | <b>0.8</b> ( 8 %)   | <b>1.2</b> ( 6 %)   |
| <b>G6P versus</b> | <b>Pi</b>   | <b>10.5</b> (100 %) | <b>32.6</b> (100 %) |
|                   | <b>Ru5P</b> | <b>12.2</b> (116 %) | <b>28.3</b> ( 87 %) |
|                   | <b>6PG</b>  | <b>0.9</b> ( 9 %)   | <b>3.1</b> ( 10 %)  |

893

894

895

896

897 **Table 2. Seeds and aborted ovules without and upon ectopic *GPT* expression.**  
 898 *Arabidopsis thaliana* ecotype Ws-2 and heterozygous *gpt1-1* and *gpt1-2* T-DNA lines compared  
 899 to plastid compensated *GPT1 gpt1-2::ProMAS:GPT2* or *::ProGPT1:GPT2* lines (T2 generation),  
 900 and ER/peroxisomal compensated line *::Pro35S:GFP-GPT1\_C-mat* (T3 generation).  
 901 Transformed progeny was initially selected on Hygromycin B. SD, standard deviation.

| Genotype                                                     | Normal seeds | Aborted ovules | Frequency (% ± SD) |
|--------------------------------------------------------------|--------------|----------------|--------------------|
| <b><i>GPT1 GPT1</i></b> (Ws-2)                               | 439          | 39             | <b>8.3 ± 4.3</b>   |
| <i>GPT1 GPT1</i> *                                           | 755          | 53             | 6.6                |
| <b><i>GPT1 gpt1-1</i></b>                                    | 86           | 26             | <b>30.2</b> (mean) |
| <i>GPT1 gpt1-1</i> *                                         | 507          | 236            | 32.0               |
| <b><i>GPT1 gpt1-1::ProMAS:GPT2</i></b> (line 3)              | 1195         | 495            | <b>28.8 ± 7.2</b>  |
| <b><i>GPT1 gpt1-1::ProMAS:GPT2</i></b> (line 7)              | 1587         | 585            | <b>27.2 ± 8.8</b>  |
| <b><i>GPT1 gpt1-2</i></b>                                    | 371          | 164            | <b>29.4 ± 6.9</b>  |
| <i>GPT1 gpt1-2</i> *                                         | 1357         | 530            | 28.0               |
| <b><i>GPT1 gpt1-2::ProGPT1:GPT2</i></b> (line 3)             | 2082         | 529            | <b>20.6 ± 8.9</b>  |
| <b><i>GPT1 gpt1-2::Pro35S:GFP-GPT1_C-mat</i></b> (line 14.5) | 1412         | 690            | <b>33.8 ± 9.8</b>  |
| <i>gpt1-2 gpt1-2::gGPT1-3.10</i> *                           | 1461         | 104            | 6.6                |

902 \*Data of Niewiadomski et al. (2005) for comparison; n.d., not determined.

903

904

905 **Table 3. Transmission of the *gpt1* alleles with and without ectopic *GPT* expression.**

906 Segregation analysis of heterozygous *gpt1-1* and *gpt1-2* lines upon selfing or transformation  
 907 with the indicated *GPT* rescue constructs: *GPT2* cDNA was driven either by the constitutive  
 908 *ProMAS* (T2 generation) or the *GPT1* promoter (T2 and T3 generation). ER/peroxisomal  
 909 *Pro35S:GFP-GPT1\_C-mat* was analyzed in parallel (transformed plants were selected on  
 910 Hygromycin). No homozygous *gpt1* plants were found. Therefore plastid-compensated *GPT1*  
 911 *gpt1-2::ProGPT1:GPT2* was reciprocally crossed with ER/peroxisomal rescue construct *GPT1*  
 912 *gpt1-2::Pro35S:GFP-GPT1\_C-mat*. Only one combination set seeds, indicating that *GPT2* is  
 913 unable to rescue *GPT1* function during pollen maturation. Still no homozygous *gpt1* plants were  
 914 found. Thus, *GPT1 gpt1-2::ProGPT1:GPT2* was super-transformed with ER/peroxisomal rescue  
 915 construct *ProGPT1:GPT1\_N-long mat* (lacking the TP region) and selected on Kanamycin.  
 916 Among the progeny of individuals carrying all three T-DNA alleles, *gpt1-2* transmission markedly  
 917 improved, although no homozygous plants were found. Of note, this was also true for lines  
 918 devoid of *ProGPT1:GPT2*. Values are given in percent with number (n) of plants analyzed.

| <b>Genotype</b>                                                                                   | <b><i>GPT1 GPT1</i><br/>+/+</b> | <b><i>GPT1 gpt1</i><br/>+/-</b> | <b><i>gpt1 gpt1</i><br/>-/-</b> |
|---------------------------------------------------------------------------------------------------|---------------------------------|---------------------------------|---------------------------------|
| <b><i>GPT1 gpt1-1</i></b>                                                                         | <b>79.3</b><br>(wt = 184)       | <b>20.7</b><br>(he = 48)        | <b>0</b><br>(n = 232)           |
| <b><i>GPT1 gpt1-1::ProMAS:GPT2</i> (lines 3 &amp; 7, T2)</b>                                      | <b>67.8</b><br>(wt = 214)       | <b>32.2</b><br>(he = 102)       | <b>0</b><br>(n = 316)           |
| <b><i>GPT1 gpt1-2</i></b>                                                                         | <b>74.8</b><br>(wt = 95)        | <b>25.2</b><br>(he = 32)        | <b>0</b><br>(n = 127)           |
| <b><i>GPT1 gpt1-2::ProGPT1:GPT2</i> (line 3, T2)</b>                                              | <b>71.0</b><br>(wt = 115)       | <b>29.0</b><br>(he = 47)        | <b>0</b><br>(n = 162)           |
| <b><i>GPT1 gpt1-2::Pro35S:GFP-GPT1_C-mat</i> (T3)</b>                                             | <b>65.8</b><br>(wt = 100)       | <b>34.2</b><br>(he = 51)        | <b>0</b><br>(n = 151)           |
| <b><i>GPT1 gpt1-2::ProGPT1:GPT2</i> (♀) x<br/><i>GPT1 gpt1-2::Pro35S:GFP-GPT1_C-mat</i> (F2)*</b> | <b>80.0</b><br>(wt = 152)       | <b>20.0</b><br>(he = 38)        | <b>0</b><br>(n = 190)           |
| <b><i>GPT1 gpt1-2::ProGPT1:GPT2</i> (line 3, T3)<br/><i>::ProGPT1:GPT1_N-long mat</i> (T2)*</b>   | <b>56.1</b><br>(wt = 184)       | <b>43.9</b><br>(he = 144)       | <b>0</b><br>(n = 328)           |
| <b><i>GPT1 gpt1-2::ProGPT1:GPT1_N-long mat</i> (T2)</b>                                           | <b>56.5</b><br>(wt = 48)        | <b>43.5</b><br>(he = 37)        | <b>0</b><br>(n = 85)            |

919 \*progeny of plants containing all three T-DNAs; wt, wildtype; he, heterozygous; n, number analyzed; n.d., not  
 920 determined

921  
 922

923 **Figure legends** (2283 words)

924

925 **Figure 1. GPT1 reporter fusions dually localize to plastids and the ER.**

926 **A**, Topology model of Arabidopsis glucose-6-phosphate/phosphate translocator (GPT) isoforms  
927 with 10 membrane domains (MD) depicted as barrels (roman numbering), connected by hinge  
928 regions (red, positive; blue, negative; grey, neutral net charge), and both N-/C-terminal ends  
929 facing the stroma (Lee et al. 2017). Relevant positions are indicated: Plastidic transit peptide  
930 (TP, green), TP processing site (upward arrow), N-terminal amino acids potentially  
931 modified/regulatory in GPT1 (arrowheads), medial OFP insertion (*5MD:5MD*) and C-terminal  
932 GFP fusion (*N-full*). ER, endoplasmic reticulum; IMS, intermembrane space. **B-C**, Localization of  
933 the depicted GPT-reporter fusions upon transient expression in Arabidopsis protoplasts (24-48 h  
934 post transfection). **B**, With free N-terminus, GPT1 targets both plastids and the ER (panels a and  
935 c, arrowheads), but GPT2 only plastids (Pla; panels b and d). **C**, The medial GPT1\_*5MD:5MD*  
936 construct (wt, wildtype) was used for analyzing potential effects of single amino acid changes in  
937 the N-terminus: S27A (abolishing phosphorylation), S27D (phospho-mimic) and C65S  
938 (precluding S modification). All images show maximal projections of approximately 30 optical  
939 sections (Merge, for single channel images, see Supplemental Figure 5). Candidate fusions in  
940 green, ER marker (panel B, OFP-ER; panel C, GFP-ER) or peroxisome marker (Per; OFP-  
941 PGL3\_C-*short*) in magenta, and chlorophyll fluorescence in blue. Co-localization of green and  
942 magenta (or very close signals less than 200 nm) appear white in the Merge of all channels.  
943 Bars = 3  $\mu$ m.

944 **Figure 2. Domain swaps demonstrate that the N-terminus of GPT1 confers ER targeting.**

945 **A**, Topology models of the GPT *medial* swap constructs, with orientation of the inserted  
946 reporters: GFP facing the stroma/cytosol and OFP the intermembrane space (IMS)/lumen of the  
947 endoplasmic reticulum (ER). Membrane domains (depicted as barrels, roman numbering) of  
948 GPT1 in blue and of GPT2 in green. The upward arrows indicate transit peptide cleavage sites  
949 (plastid stroma). **B**, Localization of the indicated medial swap constructs in Arabidopsis  
950 protoplasts (24-48 h post transfection). When headed by GPT1 (GPT1\_*2MD:8MD*\_GPT2 or  
951 GPT1\_*5MD:5MD*\_GPT2), plastids and the ER (arrowheads) are labeled (panels a,b and e,f);  
952 when headed by GPT2 (GPT2\_*2MD:8MD*\_GPT1 or GPT2\_*5MD:5MD*\_GPT1), only plastids (Pla)  
953 are labeled (panels c,d and g,h). All images show maximal projections of approximately 30  
954 optical sections (Merge, for single channel images, see Supplemental Figure 7). Candidate

955 fusions in green, ER marker (G/OFP-ER) or peroxisome marker (Per; G/OFP-PGL3\_*C-short*) in  
956 magenta, and chlorophyll fluorescence in blue. Co-localization of green and magenta (and very  
957 close signals less than 200 nm) appear white in the Merge of all channels. Bars = 3  $\mu$ m.

958 **Figure 3. GPT1 dimer formation occurs at plastids and ER substructures.**

959 **A**, Topology model of GPT1 with N-terminal transit peptide (green) and cleavage site (upward  
960 arrow) plus position of amino acids S27 and C65 (arrowheads). The membrane domains are  
961 depicted as barrels (roman numbering) connected by hinge regions of different net charge (red,  
962 positive; blue, negative; grey, neutral). **B**, Localization of yellow BiFC signals (reconstituted split  
963 YFP, N+C halves) due to interaction of the GPT1 parts in Arabidopsis protoplasts (24-48 h post  
964 transfection). With unmasked N-terminus, GPT1 may label plastids and the ER (left panels), but  
965 with masked N-terminus only the ER (right panels). In addition to unmodified GPT1 wild-type  
966 (wt), mutant combinations S27A (non-phosphorylated), S27D (phospho-mimic) and C65S  
967 (precluding S modification) were analyzed. GPT1 dimer formation occurred at plastid rims (left  
968 panels) or ER substructures (right panels), with little impact of the S27 changes, but visible effect  
969 of C65S (hollow sphere in panel i; surrounding a peroxisome in C, arrowheads). Note that  
970 structures with BiFC signals on the right (panels f-i) are also labeled by the ER marker (most  
971 obvious in panel g). **C**, Localization of the indicated split YFP combinations in co-expression  
972 with the peroxisome (Per) marker. Note that in case of C65S, the ring-like BiFC signal surrounds  
973 a peroxisome (arrowhead). All images show maximal projections of approximately 30 optical  
974 sections (Merge; for single channel images, see Supplemental Figure 8). Organelle markers  
975 (OFP-ER or OFP-PGL3\_*C-short*) in magenta, chlorophyll fluorescence in blue. Co-localization of  
976 yellow and magenta (or very close signals less than 200 nm) appear whitish in the Merge of all  
977 channels. Bars = 3  $\mu$ m.

978 **Figure 4. GPT1 interacts with cytosolic oxidoreductases Trx<sub>h7</sub> and Grx<sub>c1</sub> at the ER.**

979 **A-B**, Localization of GPT1 upon interaction with Trx h7 or Grx c1 in Arabidopsis protoplasts (24-  
980 48 h post transfection). The schemes illustrate different orientation of the candidate proteins with  
981 respect to free N- and C-terminal ends. GPT1 interacts with both oxidoreductases (green  
982 signals) at the endoplasmic reticulum (ER) and its spherical sub-structures (arrowheads), except  
983 when the N-terminus of Grx c1 is masked (B, panels c and d). Note that these substructures  
984 differ from those labelled in Figure 3B. Merge of BiFC signals (green) with ER marker (OFP-ER)  
985 or peroxisome marker (Per, OFP-PGL3\_*C-short*) in magenta, and chlorophyll fluorescence in



986 blue. **C-D**, Localization of split YFP reconstitution (BiFC, yellow signals) in heterologous tobacco  
987 protoplasts (24-48 h post transfection), testing a potential effect of the other oxidoreductase (co-  
988 expressed as OFP fusion, magenta). Note that similar ER substructures are labelled (Merge,  
989 single sections). All other images show maximal projections of approximately 30 optical sections.  
990 Chlorophyll fluorescence in blue. Co-localization and very close signals (less than 200 nm)  
991 appear white in the Merge of all channels. Bars = 3  $\mu$ m.

992 **Figure 5. Interaction versus co-localization of GPT1 with Pex factors at the ER.**

993 **A**, Localization of the indicated split YFP combinations (yellow BiFC signals) in Arabidopsis  
994 protoplasts (24-48 h post transfection). Pex3, Pex16, and Pex19 are important for sorting a class  
995 of peroxisomal membrane proteins via the ER to peroxisomes. Per; soluble peroxisome marker  
996 (OFP-PGL3\_*C-short*) in magenta. **B**, Co-expression of GFP-GPT1 and the corresponding Pex-  
997 OFP fusions indicates that interaction with the Pex factors is transient (isoforms Pex3-2 =  
998 At1g48635 and Pex19-2 = At5g17550 gave comparable results, not shown). Note that Pex16  
999 co-expression has a vesiculating effect on GPT1 at the ER (Merge; for single channel images,  
1000 see Supplemental Figure 10C). **A-B**, Maximal projections of approximately 30 optical sections.  
1001 **C**, Co-expression of the indicated GFP-GPT1 fusions with Pex16-OFP in Arabidopsis  
1002 protoplasts (72 h post transfection). The *C\_mat* version lacks the entire N-terminal part  
1003 (including C65), whereas *C\_long mat* version lacks only the transit peptide (Supplemental Figure  
1004 1). Besides the 35S promoter (*Pro35S*), these GFP fusions were also expressed from the GPT1  
1005 promoter (*ProGPT1*), with similar results. Images show single optical sections (Merge; for single  
1006 channel images, see Supplemental Figure 11). GFP fusions in green, Pex16-OFP in magenta  
1007 and chlorophyll fluorescence in blue. Co-localization of green and magenta (or very close signals  
1008 less than 200 nm) appear white in the Merge of all channels. Bars = 3  $\mu$ m.

1009 **Figure 6. Transport activity and localization of mature GPT1 in yeast and plant cells.**

1010 **A**, Time-dependent uptake of radioactively labeled [ $^{14}$ C]-G6P (0.2 mM) into reconstituted  
1011 proteoliposomes preloaded with 10 mM Pi (closed symbols) or without exchange substrate  
1012 (open symbols) prepared from yeast cells harboring the empty vector (pYES) or the indicated  
1013 GPT constructs. Note that transport rates of GPT1 are not influenced by the N-terminal tag  
1014 (compare His-matGPT1 to GFP-matGPT1). In all graphs, the arithmetic mean of 3 technical  
1015 replicates ( $\pm$ SD) was plotted against time (see Table 1 for substrate specificities). **B**, Immunoblot  
1016 analysis upon expression in yeast and plant cells. Left, SDS gel of total yeast membrane

1017 fractions, stained with Coomassie brilliant blue (CBB) or blot detection by anti-His ( $\alpha$ -His) or anti-  
1018 GFP ( $\alpha$ -GFP) antibodies: 1, empty vector; 2, His-matGPT1 (grey open triangle); 3, GFP-  
1019 matGPT1 (green closed and open triangles). Right, blotted pellet fractions of leaf extracts  
1020 (without detergent) prepared from *Arabidopsis GPT1 gpt1-2::Pro35S:GFP-GPT1\_C-mat* plants  
1021 (T2 progeny without (w/o) or with the transgene) developed with anti-GFP ( $\alpha$ -GFP) antibodies.  
1022 The Ponceau S-stained blot serves as loading reference. Note that GFP-GPT1 (closed green  
1023 and open triangles) extracted from yeast or plant membranes migrate similarly. Bands of  
1024 molecular masses are indicated (kDa). **C**, Localization of GFP-GPT1\_C-mat in heterozygous  
1025 *GPT1 gpt1-2* plants. Top, Green net-like structures (ER) in leaf epidermal cells (left), and  
1026 spherical structures in seedlings (right); bars = 10  $\mu$ m. Bottom, Pattern upon protoplast  
1027 preparation and transfection with the peroxisome marker (Per; OFP-PGL3\_C-short, magenta) in  
1028 membranes surrounding peroxisomes (arrowheads). Chlorophyll fluorescence in blue. All  
1029 images show single optical sections. Co-localization (and very close signals less than 200 nm)  
1030 appear white in the Merge of all channels (bright field images shown as reference). Bars = 3  $\mu$ m.

1031 **Figure 7. GPT1 detection at the ER is increased by stress treatment and in reproductive**  
1032 **Arabidopsis tissues.**

1033 **A**, *Arabidopsis* protoplasts were co-transfected with the indicated GPT-GFP fusions and the  
1034 peroxisome marker (Per, OFP-PGL3\_C-short), samples were split in half, one was treated with  
1035 0.2  $\mu$ M flagellin peptide (+flg22), and the other mock-incubated for 24 h. Note that flg22  
1036 treatment did not change GPT localization to plastids, but enhanced the ER fraction of GPT1-  
1037 GFP (arrowheads). All images show maximal projections of approximately 30 single sections  
1038 (Merge; for single channel images, see Supplemental Figure S13). GFP fusions in green,  
1039 peroxisome marker in magenta, and chlorophyll fluorescence in blue. Co-localization of magenta  
1040 and green or very close signals (less than 200 nm) appear white in the Merge of all channels.  
1041 Bars = 3  $\mu$ m. **B-C**, Protein extracts (without detergent) of flower, leaf, and (green) silique tissue  
1042 were prepared from wild-type plants (Col, Ws) and the indicated homozygous mutant lines.  
1043 Supernatant fractions were separated on 10% SDS gels and blotted to nitrocellulose. After  
1044 Ponceau-S staining, the blots were developed with GPT1-specific antibodies ( $\alpha$ -GPT1) raised  
1045 against the N-terminus with His-tag (Supplemental Figure S14). Arrowheads mark double bands  
1046 of full-length GPT1 (predicted size: 42.3 kDa) and mature GPT1 (ca. 37-39 kDa, depending on  
1047 TP processing). Red arrowheads point to bands suspected to represent a largely 'off' situation  
1048 and black arrowheads the corresponding 'on' situation at either location (as deduced from  
1049 comparison of leaf to silique tissue), likely due to protein modification. **C**, Immunoblot of

1050 seedlings harvested from germination plates (1% sucrose) after 1- or 4-week (w) growth in short-  
1051 day regime. Included mutant alleles: *gpt2-2* (GK-950D09, T-DNA intron 2/exon 3), *gpt2-3* (GK-  
1052 780F12, T-DNA in exon 4), *tpt-5* (FLAG\_124C02, T-DNA in exon 9), and *xpt-2* (SAIL\_378C01,  
1053 single exon; Hilgers et al., 2018). Note that the band pattern differs in OPPP-relevant *gpt2* and  
1054 *xpt* transporter mutants compared to Col wildtype and *tpt-5* (Ws wildtype corresponds to *tpt-5*,  
1055 grey dashed line). Ponceau S-stained blots (protein) are shown as loading reference; RbL,  
1056 large subunit of RubisCO. Molecular masses are indicated in kDa (PageRuler Prestained Protein  
1057 Ladder, Fermentas).

1058  
1059 **Figure 8. Phylogenetic analysis of GPT sequences from different plant clades.**  
1060 Selected GPT isoforms of the *Brassicaceae*, *Fabaceae*, *Solanaceae* and *Poaceae* in  
1061 comparison to the moss *Physcomitrella patens*. The phosphoenolpyruvate/phosphate  
1062 translocator (PPT) accessions serve as outgroup (red). Glucose-6-phosphate/phosphate  
1063 translocators (GPT) of *Physcomitrella patens* (Pp, violet) form the base of the phylogenetic tree.  
1064 GPT2 accessions (green) of monocotyledonous plants split off early (monocots, dark green),  
1065 whereas the GPT1 accessions (blue) split much later from the GPT2 accessions (light green) in  
1066 the dicotyledonous branch (dicots). For sequence identifications see Table S3. Abbreviations: *Al*:  
1067 *Arabidopsis lyrata* subsp. *lyrata*; *At*: *Arabidopsis thaliana*; *Bn*: *Brassica napus*; *Gm*: *Glycine max*;  
1068 *La*: *Lupinus angustifolius*; *Nt*: *Nicotiana tabacum*; *Os*: *Oryza sativa*; *St*: *Solanum tuberosum*; *Zm*:  
1069 *Zea mays*. Evolutionary history was inferred by using the Maximum Likelihood method based on  
1070 the JTT matrix-based model (Jones et al., 1992). The tree with highest log likelihood (-5414.98)  
1071 is shown. Initial tree(s) for the heuristic search were obtained automatically by applying  
1072 Neighbor-Join and BioNJ algorithms to a matrix of pairwise distances estimated using a JTT  
1073 model, and then selecting the topology with superior log likelihood value. The tree is drawn to  
1074 scale, with branch lengths measured in the number of substitutions per site. The analysis  
1075 involved 34 amino acid sequences (Supplemental Table 3). All positions containing gaps and  
1076 missing data were eliminated. There were a total of 252 positions in the final dataset.  
1077 Evolutionary analyses were conducted in MEGA7 (Kumar et al., 2016).

1078

1079 **Figure 9. Model of dual GPT1 targeting for OPPP function in plastids and peroxisomes.**

1080 **A**, GPT1 precursors in the cytosol are covered with chaperons (grey spheres) and co-chaperons  
1081 Trx<sub>h7</sub> and Grx<sub>c1</sub> as putative redox sensors/transmitters (orange = reduced state, -SH; yellow =  
1082 oxidized state, -S-S-). The hydrophobic membrane domains (barrels) of GPT1 are labeled with

1083 roman numerals. Hinge regions of negative net charge (blue) may facilitate ER insertion. Left, In  
1084 largely reduced state of the cytosolic glutathione pool (GSH), the N-terminus of GPT1 (green)  
1085 enters the TOC/TIC complex (translocon of the outer/inner chloroplast envelope), the membrane  
1086 domains (MDs) integrate into the inner envelope membrane (IEM), and the transit peptide is  
1087 processed (open arrow)/degraded in the stroma (dotted line). Local oxidation (flash sign) of the  
1088 cytosolic glutathione pool (GSSG) likely retains GPT1 in the cytosol by a functional change in the  
1089 bound redox transmitters ( $\text{Grx}_{c1}$  and  $\text{Trx}_{n7}$ ). Whether this involves  $^{65}\text{C}$  in the GPT1 N-terminus is  
1090 unclear (question mark). ER insertion involves Sec61 and sorting to peroxisomal membranes  
1091 specific peroxins (Pex). Brefeldin A (BFA) blocked ER import of GPT1. **B**, Scheme of sugar  
1092 metabolism in a physiological sink state. Sucrose (suc) is cleaved by cytosolic invertase yielding  
1093 two hexoses (hex) that are activated by hexokinase (HXK), consuming ATP provided by  
1094 glycolysis and mitochondrial respiration (not shown). By contrast to GPT2, GPT1 imports G6P  
1095 into both plastids (in exchange for Pi released by GPT2-driven starch synthesis) and  
1096 peroxisomes (in exchange for Ru5P that may also enter plastids via GPT1, dashed red arrows),  
1097 yielding 2 moles of NADPH in the oxidative part of the OPPP. NADP inside peroxisomes is  
1098 formed by NAD kinase (NADK3) that relies on ATP and NAD imported into peroxisomes via  
1099 PNC (At3g05290; At5g27520) and PXN (At2g39970). The cytosolic OPPP reactions are usually  
1100 linked via RPE and XPT to the complete pathway in the plastid stroma. Abbreviations: G6PD,  
1101 Glucose-6-phosphate dehydrogenase; PGL, 6-Phosphogluconolactonase; PGD, 6-  
1102 phosphogluconate dehydrogenase; RPE/I, ribulose-phosphate epimerase/isomerase.

1103

1104

## 1105 **REFERENCES**

1106

- 1107 Ackerley, S., Thornhill, P., Grierson, A.J., Brownlees, J., Anderton, B.H., Leigh, P.N., Shaw,  
1108 C.E., and Miller, C.C.J. (2003). Neurofilament heavy chain side arm phosphorylation  
1109 regulates axonal transport of neurofilaments. *J. Cell Biol.* 161: 489–495.
- 1110 Aicart-Ramos, C., Valero, R.A., and Rodriguez-Crespo, I. (2011). Protein palmitoylation and  
1111 subcellular trafficking. *Biochim. Biophys. Acta* 1808: 2981–2994.
- 1112 Andriotis, V.M.E., Pike, M.J., Bunnewell, S., Hills, M.J., and Smith, A.M. (2010). The plastidial  
1113 glucose-6-phosphate/phosphate antiporter GPT1 is essential for morphogenesis in  
1114 *Arabidopsis* embryos. *Plant J.* 64: 128–139.
- 1115 Andriotis, V.M.E. and Smith, A.M. (2019). The plastidial pentose phosphate pathway is essential  
1116 for postglobular embryo development in *Arabidopsis*. *Proc. Natl. Acad. Sci. U. S. A.* 116:  
1117 15297–15306.

1118 Aranovich, A., Hua, R., Rutenberg, A.D., and Kim, P.K. (2014). PEX16 contributes to  
1119 peroxisome maintenance by constantly trafficking PEX3 via the ER. *J. Cell Sci.* 127: 3675–  
1120 3686.

1121 Athanasiou, K., Dyson, B.C., Webster, R.E., and Johnson, G.N. (2010). Dynamic Acclimation of  
1122 Photosynthesis Increases Plant Fitness in Changing Environments. *Plant Physiol.* 152:  
1123 366–373.

1124 Baslam, M., Oikawa, K., Kitajima-Koga, A., Kaneko, K., and Mitsui, T. (2016). Golgi-to-plastid  
1125 trafficking of proteins through secretory pathway: Insights into vesicle-mediated import  
1126 toward the plastids. *Plant Signal. Behav.* 11: e1221558 (5 pages).

1127 Berndt, C., Lillig, C.H., and Holmgren, A. (2008). Thioredoxins and glutaredoxins as facilitators  
1128 of protein folding. *Biochim. Biophys. Acta - Mol. Cell Res.* 1783: 641–650.

1129 Cakir, B., Shiraishi, S., Tuncel, A., Matsusaka, H., Satoh, R., Singh, S., Crofts, N., Hosaka, Y.,  
1130 Fujita, N., Hwang, S.-K., Satoh, H., and Okita, T.W. (2016). Analysis of the Rice ADP-  
1131 Glucose Transporter (OsBT1) Indicates the Presence of Regulatory Processes in the  
1132 Amyloplast Stroma That Control ADP-Glucose Flux into Starch. *Plant Physiol.* 170: 1271–  
1133 1283.

1134 Cavalier-Smith, T. (2009). Predation and eukaryote cell origins: A coevolutionary perspective.  
1135 *Int. J. Biochem. Cell Biol.* 41: 307–322.

1136 Chen, J., Lalonde, S., Obrdlik, P., Noorani Vatani, A., Parsa, S.A., Vilarino, C., Revuelta, J.L.,  
1137 Frommer, W.B., and Rhee, S.Y. (2012). Uncovering Arabidopsis Membrane Protein  
1138 Interactome Enriched in Transporters Using Mating-Based Split Ubiquitin Assays and  
1139 Classification Models. *Front. Plant Sci.* 3: 1–14.

1140 Chua, N.-H. and Schmidt, G.W. (1979). Transport of Proteins into Mitochondria and  
1141 Chloroplasts. *J. Cell Biol.* 81: 461–483.

1142 Clough, S.J. and Bent, A.F. (1998). Floral dip: a simplified method for *Agrobacterium*-mediated  
1143 transformation of *Arabidopsis thaliana*. *Plant J.* 16: 735–743.

1144 Considine, M.J. and Foyer, C.H. (2014). Redox Regulation of Plant Development. *Antioxid.*  
1145 *Redox Signal.* 21: 1305–1326.

1146 Corpas, F.J., Barroso, J.B., Sandalio, L.M., Distefano, S., Palma, J.M., Lupiáñez, J.A., and del  
1147 Río, L.A. (1998). A dehydrogenase-mediated recycling system of NADPH in plant  
1148 peroxisomes. *Biochem. J.* 330: 777–784.

1149 dal Santo, S., Stampfl, H., Krasensky, J., Kempa, S., Gibon, Y., Petutschnig, E., Rozhon, W.,  
1150 Heuck, A., Clausen, T., and Jonak, C. (2012). Stress-Induced GSK3 Regulates the Redox  
1151 Stress Response by Phosphorylating Glucose-6-Phosphate Dehydrogenase in  
1152 *Arabidopsis*. *Plant Cell* 24: 3380–3392.

1153 Dennis, D.T., Layzell, D.B., Lefebvre, D.D., and Turpin, D.H. (1997). *Plant metabolism* 2nd  
1154 Editio. D.T. Dennis, D.B. Layzell, D.D. Lefebvre, and D.H. Turpin, eds (Prentice Hall  
1155 College Div, Prentice Hall Inc., New Jersey).

1156 Dietz, K.-J. (2011). Peroxiredoxins in plants and cyanobacteria. *Antioxid. Redox Signal.* 15:  
1157 1129–1159.

1158 Durek, P., Schmidt, R., Heazlewood, J.L., Jones, A., MacLean, D., Nagel, A., Kersten, B., and  
1159 Schulze, W.X. (2009). PhosPhAt: The *Arabidopsis thaliana* phosphorylation site database.  
1160 An update. *Nucleic Acids Res.* 38: 828–834.

1161 Dyson, B.C., Allwood, J.W., Feil, R., Xu, Y., Miller, M., Bowsher, C.G., Goodacre, R., Lunn, J.E.,  
1162 and Johnson, G.N. (2015). Acclimation of metabolism to light in *Arabidopsis thaliana*: The

1163 glucose 6-phosphate/phosphate translocator GPT2 directs metabolic acclimation. *Plant,*  
1164 *Cell Environ.* 38: 1404–1417.

1165 Dyson, B.C., Webster, R.E., and Johnson, G.N. (2014). GPT2: A glucose 6-  
1166 phosphate/phosphate translocator with a novel role in the regulation of sugar signalling  
1167 during seedling development. *Ann. Bot.* 113: 643–652.

1168 Eicks, M., Maurino, V., Knappe, S., Flügge, U.-I., and Fischer, K. (2002). The plastidic pentose  
1169 phosphate translocator represents a link between the cytosolic and the plastidic pentose  
1170 phosphate pathways in plants. *Plant Physiol.* 128: 512–522.

1171 Eubel, H., Meyer, E.H., Taylor, N.L., Bussell, J.D., O’Toole, N., Heazlewood, J.L., Castleden, I.,  
1172 Small, I.D., Smith, S.M., and Millar, a H. (2008). Novel proteins, putative membrane  
1173 transporters, and an integrated metabolic network are revealed by quantitative proteomic  
1174 analysis of *Arabidopsis* cell culture peroxisomes. *Plant Physiol.* 148: 1809–29.

1175 Fancy, N.N., Bahlmann, A.-K., and Loake, G.J. (2016). Nitric oxide function in plant abiotic  
1176 stress. *Plant. Cell Environ.:* 1–11.

1177 Fernández-Fernández, Á.D. and Corpas, F.J. (2016). In Silico Analysis of *Arabidopsis thaliana*  
1178 Peroxisomal 6-Phosphogluconate Dehydrogenase. *Scientifica (Cairo)*. 2016.

1179 Flügge, U.-I. (1999). Phosphate Translocators in Plastids. *Annu. Rev. Plant Physiol. Plant Mol.*  
1180 *Biol.* 50: 27–45.

1181 Flügge, U.-I., Häusler, R.E., Ludewig, F., and Gierrh, M. (2011). The role of transporters in  
1182 supplying energy to plant plastids. *J. Exp. Bot.* 62: 2381–2392.

1183 Foyer, C.H., Bloom, A.J., Queval, G., and Noctor, G. (2009). Photorespiratory metabolism:  
1184 genes, mutants, energetics, and redox signaling. *Annu. Rev. Plant Biol.* 60: 455–484.

1185 Geigenberger, P., Kolbe, A., and Tiessen, A. (2005). Redox regulation of carbon storage and  
1186 partitioning in response to light and sugars. *J. Exp. Bot.* 56: 1469–1479.

1187 Gietz, R.D. and Schiestl, R.H. (2007). High-efficiency yeast transformation using the LiAc/SS  
1188 carrier DNA/PEG method. *Nat. Protoc.* 2: 31–34.

1189 Goder, V., Junne, T., and Spiess, M. (2004). Sec61p Contributes to Signal Sequence  
1190 Orientation According to the Positive-Inside Rule. *Mol. Biol. Cell* 15: 1470–1478.

1191 Gong, F.-C., Giddings, T.H., Meehl, J.B., Staehelin, L.A., and Galbraith, D.W. (1996). Z-  
1192 membranes: artificial organelles for overexpressing recombinant integral membrane  
1193 proteins. *Proc. Natl. Acad. Sci. U. S. A.* 93: 2219–2223.

1194 Gould, S.J., Keller, G.-A., Hosken, N., Wilkinson, J., and Subramani, S. (1989). A Conserved  
1195 Tripeptide Sorts Proteins to Peroxisomes. *J. Cell Biol.* 108: 1657–1664.

1196 Greaves, J., Salaun, C., Fukata, Y., Fukata, M., and Chamberlain, L.H. (2008). Palmitoylation  
1197 and membrane interactions of the neuroprotective chaperone cysteine-string protein. *J.*  
1198 *Biol. Chem.* 283: 25014–25026.

1199 Guevara-Garcia, A., Mosqueda-Cano, G., Argüello-Astorga, G., Simpson, J., and Herrera-  
1200 Estrella, L. (1993). Tissue-specific and wound-inducible pattern of expression of the  
1201 mannopine synthase promoter is determined by the interaction between positive and  
1202 negative cis-regulatory elements. *Plant J.* 4: 495–505.

1203 Gurrieri, L., Distefano, L., Pirone, C., Horrer, D., Seung, D., Zaffagnini, M., Rouhier, N., Trost, P.,  
1204 Santelia, D., and Sparla, F. (2019). The Thioredoxin-Regulated  $\alpha$ -Amylase 3 of  
1205 *Arabidopsis thaliana* Is a Target of S-Glutathionylation. *Front. Plant Sci.* 10: 993.

1206 Hadden, D. a, Phillipson, B. a, Johnston, K. a, Brown, L.-A., Manfield, I.W., El-Shami, M.,  
 1207 Sparkes, I. a, and Baker, A. (2006). Arabidopsis PEX19 is a dimeric protein that binds the  
 1208 peroxin PEX10. *Mol. Membr. Biol.* 23: 325–236.  
 1209 Hauschild, R. and von Schaewen, A. (2003). Differential regulation of glucose-6-phosphate  
 1210 dehydrogenase isoenzyme activities in potato. *Plant Physiol.* 133: 47–62.  
 1211 Heazlewood, J.I., Durek, P., Hummel, J., Selbig, J., Weckwerth, W., Walther, D., and Schulze,  
 1212 W.X. (2008). PhosPhAt : A database of phosphorylation sites in Arabidopsis thaliana and a  
 1213 plant-specific phosphorylation site predictor. *Nucleic Acids Res.* 36: 1015–1021.  
 1214 von Heijne, G. (1986). Net N-C charge imbalance may be important for signal sequence function  
 1215 in bacteria. *J. Mol. Biol.* 192: 287–290.  
 1216 Hemsley, P.A. (2015). The importance of lipid modified proteins in plants. *New Phytol.* 205: 476–  
 1217 489.  
 1218 Hilgers, E.J.A., Schöttler, M.A., Mettler-Altmann, T., Krueger, S., Dörmann, P., Eicks, M.,  
 1219 Flügge, U.I., and Häusler, R.E. (2018). The combined loss of triose phosphate and  
 1220 xylulose 5-phosphate/phosphate translocators leads to severe growth retardation and  
 1221 impaired photosynthesis in arabidopsis thaliana tpt/xpt double mutants. *Front. Plant Sci.* 9.  
 1222 Hölscher, C., Lutterbey, M.-C., Lansing, H., Meyer, T., Fischer, K., and von Schaewen, A.  
 1223 (2016). Defects in peroxisomal 6-phosphogluconate dehydrogenase isoform PGD2  
 1224 prevent gametophytic interaction in Arabidopsis thaliana. *Plant Physiol.*: pp.15.01301-  
 1225 Hölscher, C., Meyer, T., and Von Schaewen, A. (2014). Dual-targeting of arabidopsis 6-  
 1226 phosphogluconolactonase 3 (PGL3) to chloroplasts and peroxisomes involves interaction  
 1227 with Trx m2 in the cytosol. *Mol. Plant* 7: 252–255.  
 1228 Hua, R., Gidda, S.K., Aranovich, A., Mullen, R.T., and Kim, P.K. (2015). Multiple Domains in  
 1229 PEX16 Mediate Its Trafficking and Recruitment of Peroxisomal Proteins to the ER. *Traffic:*  
 1230 n/a-n/a.  
 1231 Hunt, J.E. and Trelease, R.N. (2004). Sorting pathway and molecular targeting signals for the  
 1232 Arabidopsis peroxin 3. *Biochem. Biophys. Res. Commun.* 314: 586–596.  
 1233 Hutchings, D., Rawsthorne, S., and Emes, M.J. (2005). Fatty acid synthesis and the oxidative  
 1234 pentose phosphate pathway in developing embryos of oilseed rape (*Brassica napus* L.). *J.*  
 1235 *Exp. Bot.* 56: 577–585.  
 1236 Jones, A.M. et al. (2014). Border Control - A Membrane-Linked Interactome of Arabidopsis.  
 1237 *Science* (80-. ). 344: 711–716.  
 1238 Jones, D.T., Taylor, W.R., and Thornton, J.M. (1992). The rapid generation of mutation data  
 1239 matrices from protein sequences. *Comput. Appl. Biosci.* 8: 275–282.  
 1240 Kammerer, B., Fischer, K., Hilpert, B., Schubert, S., Gutensohn, M., Weber, A., and Flügge,  
 1241 U.-I. (1998). Molecular Characterization of a Carbon Transporter in Plastids from  
 1242 Heterotrophic Tissues: The Glucose 6-Phosphate/Phosphate Antiporter. *Plant Cell* 10:  
 1243 105–117.  
 1244 Kao, Y.T., Gonzalez, K.L., and Bartel, B. (2018). Peroxisome function, biogenesis, and dynamics  
 1245 in plants. *Plant Physiol.* 176: 162–177.  
 1246 Karnik, S.K. and Trelease, R.N. (2005). Arabidopsis peroxin 16 coexists at steady state in  
 1247 peroxisomes and endoplasmic reticulum. *Plant Physiol.* 138: 1967–1981.  
 1248 Kataya, A. and Reumann, S. (2010). Arabidopsis glutathione reductase 1 is dually targeted to  
 1249 peroxisomes and the cytosol. *Plant Signal. Behav.* 5: 171–175.

1250 Kim, P.K. and Hettema, E.H. (2015). Multiple Pathways for Protein Transport to Peroxisomes. *J.*  
1251 *Mol. Biol.* 427: 1176–1190.

1252 Kim, P.K. and Mullen, R.T. (2013). PEX16: a multifaceted regulator of peroxisome biogenesis.  
1253 *Front. Physiol.* 4: 1–6.

1254 Klausner, R.D., Donaldson, J.G., and Lippincott-Schwartz, J. (1992). Brefeldin A: Insights into  
1255 the control of membrane traffic and organelle structure. *J. Cell Biol.* 116: 1071–1080.

1256 Knappe, S., Flügge, U.-I., and Fischer, K. (2003). Analysis of the plastidic phosphate  
1257 translocator gene family in Arabidopsis and identification of new phosphate translocator-  
1258 homologous transporters, classified by their putative substrate-binding site. *Plant Physiol.*  
1259 131: 1178–1190.

1260 Kruger, N.J. and Von Schaewen, A. (2003). The oxidative pentose phosphate pathway:  
1261 Structure and organisation. *Curr. Opin. Plant Biol.* 6: 236–246.

1262 Kumar, S., Stecher, G., and Tamura, K. (2016). MEGA7: Molecular Evolutionary Genetics  
1263 Analysis Version 7.0 for Bigger Datasets. *Mol. Biol. Evol.* 33: 1870–1874.

1264 Kunz, H.-H., Häusler, R.E., Fettke, J., Herbst, K., Niewiadomski, P., Gierth, M., Bell, K., Steup,  
1265 M., Flügge, U.-I., and Schneider, A. (2010). The role of plastidial glucose-6-  
1266 phosphate/phosphate translocators in vegetative tissues of Arabidopsis thaliana mutants  
1267 impaired in starch biosynthesis. *Plant Biol.* 12: 115–128.

1268 Lalonde, S. et al. (2010). A membrane protein / signaling protein interaction network for  
1269 Arabidopsis version AMPv2. *Front. Physiol.* 1: 1–14.

1270 Landi, S., Nurcato, R., De Lillo, A., Lentini, M., Grillo, S., and Esposito, S. (2016). Glucose-6-  
1271 phosphate dehydrogenase plays a central role in the response of tomato (*Solanum*  
1272 *lycopersicum*) plants to short and long-term drought. *Plant Physiol. Biochem.* 105: 79–89.

1273 Lansing, H., Doering, L., Fischer, K., Baune, M.-C., and von Schaewen, A. (2019). Analysis of  
1274 potential redundancy among Arabidopsis 6-phosphogluconolactonase (PGL) isoforms in  
1275 peroxisomes. *J. Exp. Bot.*

1276 Lee, S.K., Eom, J.S., Hwang, S.K., Shin, D., An, G., Okita, T.W., and Jeon, J.S. (2016). Plastidic  
1277 phosphoglucomutase and ADP-glucose pyrophosphorylase mutants impair starch  
1278 synthesis in rice pollen grains and cause male sterility. *J. Exp. Bot.* 67: 5557–5569.

1279 Lee, Y., Nishizawa, T., Takemoto, M., Kumazaki, K., Yamashita, K., Hirata, K., Minoda, A.,  
1280 Nagatoishi, S., Tsumoto, K., Ishitani, R., and Nureki, O. (2017). Structure of the triose-  
1281 phosphate/phosphate translocator reveals the basis of substrate specificity. *Nat. Plants* 3:  
1282 825–832.

1283 Li, S. (2014). Redox Modulation Matters: Emerging Functions for Glutaredoxins in Plant  
1284 Development and Stress Responses. *Plants* 3: 559–582.

1285 Li, Y., Li, H., Morgan, C., Bomblies, K., Yang, W., and Qi, B. (2019). Both male and female  
1286 gametogenesis require a fully functional protein S- acyl transferase 21 in Arabidopsis  
1287 thaliana . *Plant J.*

1288 Liebthal, M., Maynard, D., and Dietz, K.-J. (2018). Peroxiredoxins and Redox Signaling in  
1289 Plants. *Antioxid. Redox Signal.* 28: 609–624.

1290 Lin, Y., Cluette-brown, J.E., and Goodman, H.M. (2004). The Peroxisome Deficient Arabidopsis  
1291 Mutant sse1 Exhibits Impaired Fatty Acid Synthesis 1 [ w ]. 135: 814–827.

1292 Lin, Y., Sun, L., Nguyen, L. V, Rachubinski, R.A., and Goodman, H.M. (1999). The Pex16p  
1293 homolog SSE1 and storage organelle formation in Arabidopsis seeds. *Science* 284: 328–  
1294 30.



1295 Linka, N., Theodoulou, F.L., Haslam, R.P., Linka, M., Napier, J. a, Neuhaus, H.E., and Weber,  
1296 A.P.M. (2008). Peroxisomal ATP import is essential for seedling development in  
1297 *Arabidopsis thaliana*. *Plant Cell* 20: 3241–3257.

1298 Lisenbee, C.S., Karnik, S.K., and Trelease, R.N. (2003). Overexpression and Mislocalization of a  
1299 Tail-Anchored GFP Redefines the Identity of Peroxisomal ER. *Traffic* 4: 491–501.

1300 Majeran, W., Le Caer, J.P., Ponnala, L., Meinnel, T., and Giglione, C. (2018). Targeted profiling  
1301 of *Arabidopsis thaliana* subproteomes illuminates co- and posttranslationally N-terminal  
1302 myristoylated proteins. *Plant Cell* 30: 543–562.

1303 Marty, L. et al. (2019). *Arabidopsis* glutathione reductase 2 is indispensable in plastids, while  
1304 mitochondrial glutathione is safeguarded by additional reduction and transport systems.  
1305 *New Phytol.*

1306 Marty, L., Siala, W., Schwarzländer, M., Fricker, M.D., Wirtz, M., Sweetlove, L.J., Meyer, Y.,  
1307 Meyer, A.J., Reichheld, J.-P., and Hell, R. (2009). The NADPH-dependent thioredoxin  
1308 system constitutes a functional backup for cytosolic glutathione reductase in *Arabidopsis*.  
1309 *Proc. Natl. Acad. Sci. U. S. A.* 106: 9109–9114.

1310 McDonnell, M.M., Burkhart, S.E., Stoddard, J.M., Wright, Z.J., Strader, L.C., and Bartel, B.  
1311 (2016). The early-acting peroxin PEX19 is redundantly encoded, farnesylated, and  
1312 essential for viability in *Arabidopsis thaliana*. *PLoS One* 11: 1–19.

1313 Meng, L., Wong, J.H., Feldman, L.J., Lemaux, P.G., and Buchanan, B.B. (2010). A membrane-  
1314 associated thioredoxin required for plant growth moves from cell to cell, suggestive of a  
1315 role in intercellular communication. *Proc. Natl. Acad. Sci. U. S. A.* 107: 3900–3905.

1316 Meyer, T., Hölscher, C., Schwöppe, C., and von Schaewen, A. (2011). Alternative targeting of  
1317 *Arabidopsis* plastidic glucose-6-phosphate dehydrogenase G6PD1 involves cysteine-  
1318 dependent interaction with G6PD4 in the cytosol. *Plant J.* 66: 745–758.

1319 Mhamdi, A., Mauve, C., Gouia, H., Saindrenan, P., Hodges, M., and Noctor, G. (2010). Cytosolic  
1320 NADP-dependent isocitrate dehydrogenase contributes to redox homeostasis and the  
1321 regulation of pathogen responses in *Arabidopsis* leaves. *Plant, Cell Environ.* 33: 1112–  
1322 1123.

1323 Mueckler, M. and Lodish, H.F. (1986). The human glucose transporter can insert  
1324 posttranslationally into microsomes. *Cell* 44: 629–637.

1325 Mullen, R.T., Lisenbee, C.S., Miernyk, J. a, and Trelease, R.N. (1999). Peroxisomal membrane  
1326 ascorbate peroxidase is sorted to a membranous network that resembles a subdomain of  
1327 the endoplasmic reticulum. *Plant Cell* 11: 2167–2185.

1328 Mullen, R.T. and Trelease, R.N. (2006). The ER-peroxisome connection in plants: development  
1329 of the “ER semi-autonomous peroxisome maturation and replication” model for plant  
1330 peroxisome biogenesis. *Biochim. Biophys. Acta* 1763: 1655–1668.

1331 Murphy, M.A., Phillipson, B.A., Baker, A., and Mullen, R.T. (2003). Characterization of the  
1332 Targeting Signal of the *Arabidopsis* 22-kD Integral Peroxisomal Membrane Protein 1. *Plant*  
1333 *Physiol.* 133: 813–828.

1334 Niewiadomski, P., Knappe, S., Geimer, S., Fischer, K., Schulz, B., Unte, U.S., Rosso, M.G.,  
1335 Ache, P., Flügge, U.-I., and Schneider, A. (2005). The *Arabidopsis* plastidic glucose 6-  
1336 phosphate/phosphate translocator GPT1 is essential for pollen maturation and embryo sac  
1337 development. *Plant Cell* 17: 760–775.

1338 Noctor, G. and Foyer, C.H. (2016). Intracellular redox compartmentation and ROS-related  
1339 communication in regulation and signaling. *Plant Physiol.* 171: 1581–1592.

1340 Nozawa, A., Nanamiya, H., Miyata, T., Linka, N., Endo, Y., Weber, A.P.M., and Tozawa, Y.  
1341 (2007). A cell-free translation and proteoliposome reconstitution system for functional  
1342 analysis of plant solute transporters. *Plant Cell Physiol.* 48: 1815–1820.

1343 Orcl, L., Tagaya, M., Amherdt, M., Perrelet, A., Donaldson, J.G., Lippincott-Schwartz, J.,  
1344 Klausner, R.D., and Rothman, J.E. (1991). Brefeldin A, a drug that blocks secretion,  
1345 prevents the assembly of non-clathrin-coated buds on Golgi cisternae. *Cell* 64: 1183–  
1346 1195.

1347 Palatnik, J.F., Tognetti, V.B., Poli, H.O., Rodríguez, R.E., Blanco, N., Gattuso, M., Hajirezaei,  
1348 M.R., Sonnewald, U., Valle, E.M., and Carrillo, N. (2003). Transgenic tobacco plants  
1349 expressing antisense ferredoxin-NADP(H) reductase transcripts display increased  
1350 susceptibility to photo-oxidative damage. *Plant J.* 35: 332–341.

1351 Park, S.K. et al. (2009). Heat-shock and redox-dependent functional switching of an h-type  
1352 Arabidopsis thioredoxin from a disulfide reductase to a molecular chaperone. *Plant*  
1353 *Physiol.* 150: 552–561.

1354 Pitzschke, A., Forzani, C., and Hirt, H. (2006). Reactive oxygen species signaling in plants.  
1355 *Antioxidants & Redox Signaling* 8: 1757–1764.

1356 Platta, H.W. and Erdmann, R. (2007). Peroxisomal dynamics. *Trends Cell Biol.* 17: 474–484.

1357 Porter, B.W., Yuen, C.Y.L., and Christopher, D.A. (2015). Dual protein trafficking to secretory  
1358 and non-secretory cell compartments: Clear or double vision? *Plant Sci.* 234: 174–179.

1359 Preiser, A.L., Fisher, N., Banerjee, A., and Sharkey, T.D. (2019). Plastidic glucose-6-phosphate  
1360 dehydrogenases are regulated to maintain activity in the light. *Biochem. J.* 476: 1539–  
1361 1551.

1362 Reumann, S. (2004). Specification of the peroxisome targeting signals type 1 and type 2 of plant  
1363 peroxisomes by bioinformatics analyses. *Plant Physiol.* 135: 783–800.

1364 Reumann, S., Babujee, L., Ma, C., Wienkoop, S., Siemsen, T., Antonicelli, G.E., Rasche, N.,  
1365 Lüder, F., Weckwerth, W., and Jahn, O. (2007). Proteome analysis of Arabidopsis leaf  
1366 peroxisomes reveals novel targeting peptides, metabolic pathways, and defense  
1367 mechanisms. *Plant Cell* 19: 3170–3193.

1368 Reumann, S. and Bartel, B. (2016). Plant peroxisomes: recent discoveries in functional  
1369 complexity, organelle homeostasis, and morphological dynamics. *Curr. Opin. Plant Biol.*  
1370 34: 17–26.

1371 Reumann, S., Ma, C., Lemke, S., and Babujee, L. (2004). AraPeroX. A database of putative  
1372 Arabidopsis proteins from plant peroxisomes. *Plant Physiol.* 136: 2587–2608.

1373 Reumann, S., Maier, E., Benz, R., and Heldt, H.W. (1996). A specific porin is involved in the  
1374 malate shuttle of leaf peroxisomes. *Biochem. Soc. Trans.* 24: 754–757.

1375 del Río, L.A., Corpas, F.J., Sandalio, L.M., Palma, J.M., Gómez, M., and Barroso, J.B. (2002).  
1376 Reactive oxygen species, antioxidant systems and nitric oxide in peroxisomes. *J. Exp. Bot.*  
1377 53: 1255–1272.

1378 Riondet, C., Desouris, J.P., Montoya, J.G., Chartier, Y., Meyer, Y., and Reichheld, J.P. (2012). A  
1379 dicotyledon-specific glutaredoxin GRXC1 family with dimer-dependent redox regulation is  
1380 functionally redundant with GRXC2. *Plant, Cell Environ.* 35: 360–373.

1381 Rips, S., Bentley, N., Jeong, I.S., Welch, J.L., von Schaewen, A., and Koiwa, H. (2014). Multiple  
1382 N-Glycans Cooperate in the Subcellular Targeting and Functioning of Arabidopsis  
1383 KORRIGAN1. *Plant Cell* 26: 3792–3808.

1384 Robida, A.M. and Kerppola, T.K. (2009). Bimolecular fluorescence complementation analysis of  
1385 inducible protein interactions: effects of factors affecting protein folding on fluorescent  
1386 protein fragment association. *J. Mol. Biol.* 394: 391–409.

1387 Rokka, A., Antonenkov, V.D., Soininen, R., Immonen, H.L., Pirilä, P.L., Bergmann, U.,  
1388 Sormunen, R.T., Weckström, M., Benz, R., and Hiltunen, J.K. (2009). Pxmp2 is a channel-  
1389 forming protein in mammalian peroxisomal membrane. *PLoS One* 4: 1–15.

1390 Rottensteiner, H., Kramer, A., Lorenzen, S., Stein, K., Landgraf, C., Volkmer-Engert, R., and  
1391 Erdmann, R. (2004). Peroxisomal membrane proteins contain common Pex19p-binding  
1392 sites that are an integral part of their targeting signals. *Mol. Biol. Cell* 15: 3406–3417.

1393 Rouhier, N. (2010). Plant glutaredoxins: Pivotal players in redox biology and iron-sulphur centre  
1394 assembly. *New Phytol.* 186: 365–372.

1395 Sakaue, H., Iwashita, S., Yamashita, Y., Kida, Y., and Sakaguchi, M. (2016). The N-terminal  
1396 motif of PMP70 suppresses cotranslational targeting to the endoplasmic reticulum. *J.*  
1397 *Biochem.* 159: 539–551.

1398 Sanz-Barrio, R., Fernández-San Millán, A., Carballeda, J., Corral-Martínez, P., Seguí-Simarro,  
1399 J.M., and Farran, I. (2012). Chaperone-like properties of tobacco plastid thioredoxins f and  
1400 m. *J. Exp. Bot.* 63: 365–379.

1401 Scharte, J., Schön, H., Tjaden, Z., Weis, E., and von Schaewen, A. (2009). Isoenzyme  
1402 replacement of glucose-6-phosphate dehydrogenase in the cytosol improves stress  
1403 tolerance in plants. *Proc. Natl. Acad. Sci. U. S. A.* 106: 8061–6.

1404 Schmidt, G.W., Devillers-Thierry, A., Desruisseaux, H., Blobel, G., and Chua, N.-H. (1979). NH<sub>2</sub>-  
1405 Terminal Amino Acid Sequences of Precursor and Mature Forms of the Ribulose-1,5-  
1406 Bisphosphate Carboxylase Small Subunit From *Chlamydomonas Reinhardtii*. *J. Cell Biol.*  
1407 83: 615–622.

1408 Schnarrenberger, C., Flechner, A., and Martin, W. (1995). Enzymatic Evidence for a Complete  
1409 Oxidative Pentose Phosphate Pathway in Chloroplasts and an Incomplete Pathway in the  
1410 Cytosol of Spinach Leaves. *Plant Physiol.* 108: 609–614.

1411 Shao, S. and Hegde, R.S. (2011). Membrane protein insertion at the endoplasmic reticulum.  
1412 *Annu. Rev. Cell Dev. Biol.* 27: 25–56.

1413 Sharkey, T.D. and Weise, S.E. (2016). The glucose 6-phosphate shunt around the Calvin-  
1414 Benson cycle. *J. Exp. Bot.* 67: 4067–4077.

1415 Stampfl, H., Fritz, M., Dal Santo, S., and Jonak, C. (2016). The GSK3/Shaggy-like kinase ASK $\alpha$   
1416 contributes to pattern-triggered immunity in *Arabidopsis thaliana*. *Plant Physiol.* 171:  
1417 pp.01741.2015.

1418 Tabak, H.F., Hoepfner, D., van der Zand, A., Geuze, H.J., Braakman, I., and Huynen, M.A.  
1419 (2006). Formation of peroxisomes: Present and past. *Biochim. Biophys. Acta* 1763: 1647–  
1420 1654.

1421 Theodoulou, F.L., Bernhardt, K., Linka, N., and Baker, A. (2013). Peroxisome membrane  
1422 proteins: multiple trafficking routes and multiple functions? *Biochem. J.* 451: 345–352.

1423 Torres, M.A., Dangl, J.L., and Jones, J.D.G. (2002). *Arabidopsis* gp91phox homologues AtrbohD  
1424 and AtrbohF are required for accumulation of reactive oxygen intermediates in the plant  
1425 defense response. *Proc. Natl. Acad. Sci. U. S. A.* 99: 517–522.

1426 Traverso, J.A., Pulido, A., Rodríguez-García, M.I., and Alché, J.D. (2013). Thiol-based redox  
1427 regulation in sexual plant reproduction: new insights and perspectives. *Front. Plant Sci.* 4:  
1428 1–14.

1429 Ukuwela, A.A., Bush, A.I., Wedd, A.G., and Xiao, Z. (2018). Glutaredoxins employ parallel  
1430 monothiol-dithiol mechanisms to catalyze thiol-disulfide exchanges with protein disulfides.  
1431 Chem. Sci. 9: 1173–1183.

1432 Vandenberghe, S., Vanderauwera, S., Vuylsteke, M., Rombauts, S., Langebartels, C., Seidlitz,  
1433 H.K., Zabeau, M., Van Montagu, M., Inzé, D., and Van Breusegem, F. (2004). Catalase  
1434 deficiency drastically affects gene expression induced by high light in *Arabidopsis thaliana*.  
1435 Plant J. 39: 45–58.

1436 Walter, M., Chaban, C., Schütze, K., Batistic, O., Weckermann, K., Näke, C., Blazevic, D.,  
1437 Grefen, C., Schumacher, K., Oecking, C., Harter, K., and Kudla, J. (2004). Visualization of  
1438 protein interactions in living plant cells using bimolecular fluorescence complementation.  
1439 Plant J. 40: 428–438.

1440 Wang, Y., Windh, R.T., Chen, C.A., and Manning, D.R. (1999). N-myristoylation and  $\beta\gamma$  play  
1441 roles beyond anchorage in the palmitoylation of the G protein  $\alpha(o)$  subunit. J. Biol. Chem.  
1442 274: 37435–37442.

1443 Waszczak, C., Carmody, M., and Kangasjärvi, J. (2018). Reactive Oxygen Species in Plant  
1444 Signaling. Annu. Rev. Plant Biol. 69: 209–236.

1445 Weise, S.E., Liu, T., Childs, K.L., Preiser, A.L., Katulski, H.M., Perrin-Porzondek, C., and  
1446 Sharkey, T.D. (2019). Transcriptional regulation of the glucose-6-phosphate/phosphate  
1447 translocator 2 is related to carbon exchange across the chloroplast envelope. Front. Plant  
1448 Sci. 10.

1449 van Wijk, K.J. (2015). Protein maturation and proteolysis in plant plastids, mitochondria, and  
1450 peroxisomes. Annu Rev Plant Biol 66: 75–111.

1451 Wilkinson, J.E., Twell, D., and Lindsey, K. (1997). Activities of CaMV 35S and nos promoters in  
1452 pollen: Implications for field release of transgenic plants. J. Exp. Bot. 48: 265–275.

1453 Winter, D. et al. (2007). An “Electronic Fluorescent Pictograph” Browser for Exploring and  
1454 Analyzing Large-Scale Biological Data Sets. PLoS One e718: 1–12.

1455 Xiong, Y., Defraia, C., Williams, D., Zhang, X., and Mou, Z. (2009). Deficiency in a cytosolic  
1456 ribose-5-phosphate isomerase causes chloroplast dysfunction, late flowering and  
1457 premature cell death in *Arabidopsis*. Physiol. Plant. 137: 249–263.

1458 Zaffagnini, M., Fermani, S., Marchand, C.H., Costa, A., Sparla, F., Rouhier, N., Geigenberger,  
1459 P., Lemaire, S.D., and Trost, P. (2019). Redox Homeostasis in Photosynthetic Organisms:  
1460 Novel and Established Thiol-Based Molecular Mechanisms. Antioxid. Redox Signal. 31:  
1461 155–210.

1462 van der Zand, A., Braakman, I., and Tabak, H.F. (2010). Peroxisomal Membrane Proteins Insert  
1463 into the Endoplasmic Reticulum. Mol. Biol. Cell 21: 2057–2065.

1464 van der Zand, A., Gent, J., Braakman, I., and Tabak, H.F. (2012). Biochemically distinct vesicles  
1465 from the endoplasmic reticulum fuse to form peroxisomes. Cell 149: 397–409.

1466 Zulawski, M., Braginets, R., and Schulze, W.X. (2013). PhosPhAt goes kinases-searchable  
1467 protein kinase target information in the plant phosphorylation site database PhosPhAt.  
1468 Nucleic Acids Res. 41: 1176–1184.

1469

1470



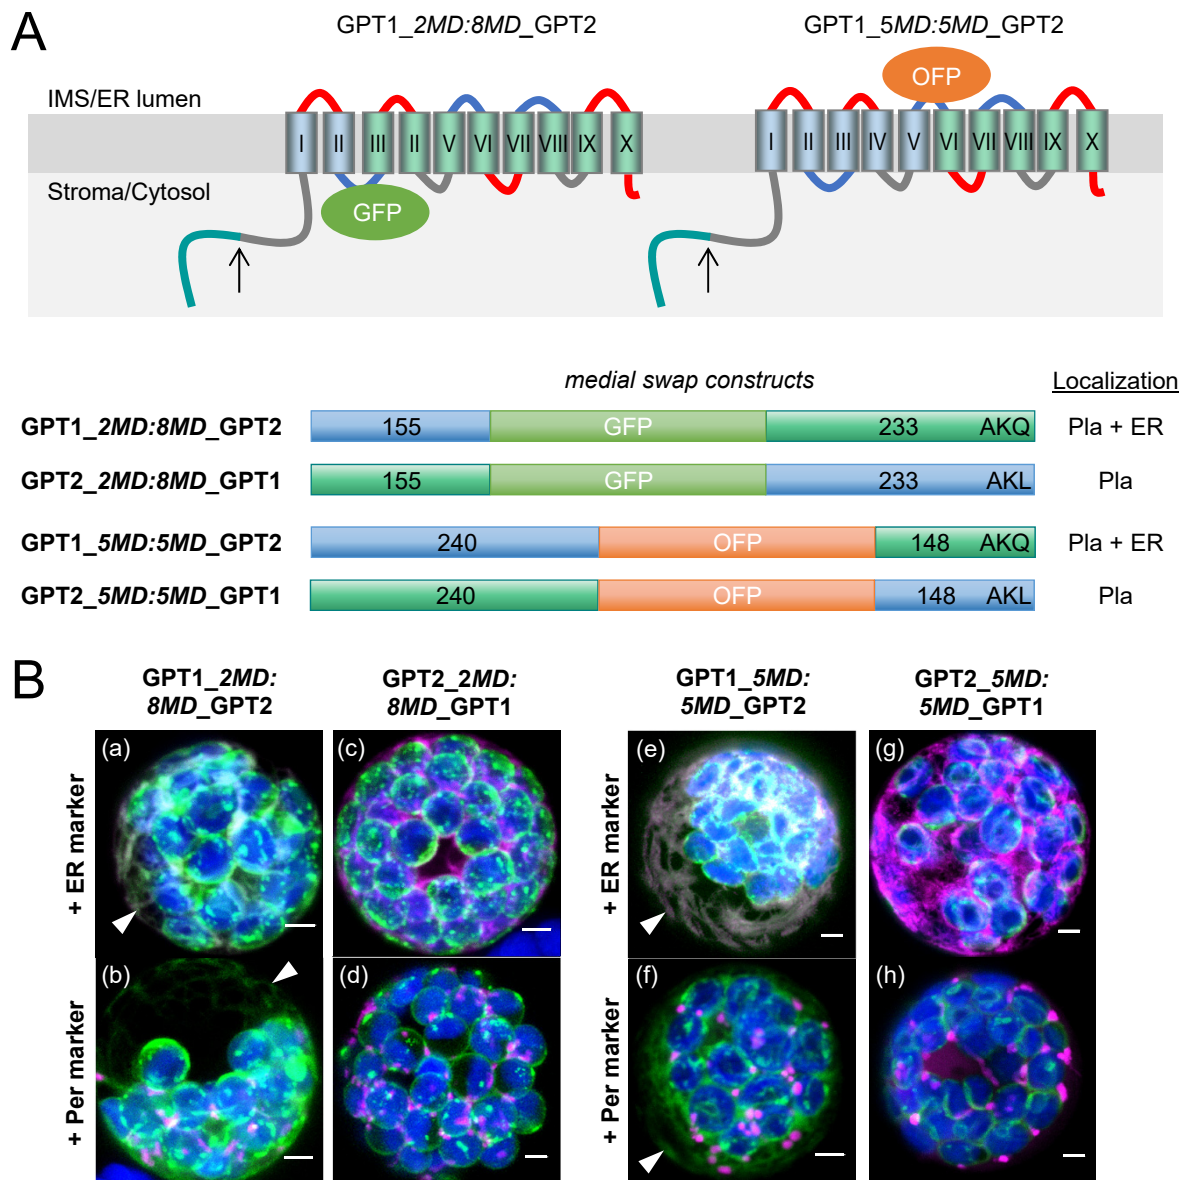

**Figure 2. Domain swaps demonstrate that the N-terminus of GPT1 confers ER targeting.**

**A**, Topology models of the GPT *medial* swap constructs, with orientation of the inserted reporters: GFP facing the stroma/cytosol and OFP the intermembrane space (IMS)/lumen of the endoplasmic reticulum (ER). Membrane domains (depicted as barrels, roman numbering) of GPT1 in blue and of GPT2 in green. The upward arrows indicate transit peptide cleavage sites (plastid stroma). **B**, Localization of the indicated medial swap constructs in Arabidopsis protoplasts (24–48 h post transfection). When headed by GPT1 (GPT1\_2MD:8MD\_GPT2 or GPT1\_5MD:5MD\_GPT2), plastids and the ER (arrowheads) are labeled (panels a,b and e,f); when headed by GPT2 (GPT2\_2MD:8MD\_GPT1 or GPT2\_5MD:5MD\_GPT1), only plastids (Pla) are labeled (panels c,d and g,h). All images show maximal projections of approximately 30 optical sections (Merge, for single channel images, see Supplemental Figure 7). Candidate fusions in green, ER marker (G/OFP-ER) or peroxisome marker (Per; G/OFP-PGL3\_C-short) in magenta, and chlorophyll fluorescence in blue. Co-localization of green and magenta (and very close signals less than 200 nm) appear white in the Merge of all channels. Bars = 3  $\mu$ m.



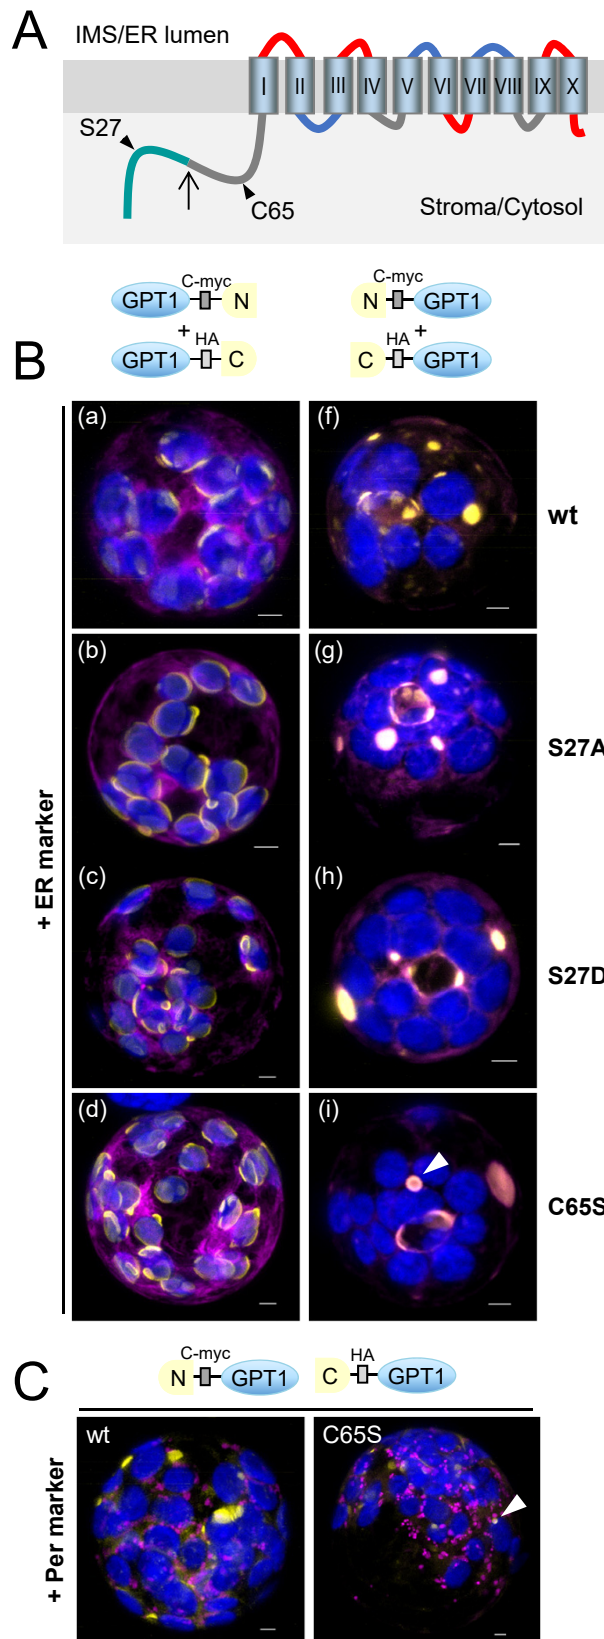

**Figure 3. GPT1 dimer formation occurs at plastids and ER substructures.**

**A**, Topology model of GPT1 with N-terminal transit peptide (green) and cleavage site (upward arrow) plus position of amino acids S27 and C65 (arrowheads). The membrane domains are depicted as barrels (roman numbering) connected by hinge regions of different net charge (red, positive; blue, negative; grey, neutral). **B**, Localization of yellow BiFC signals (reconstituted split YFP, N+C halves) due to interaction of the GPT1 parts in Arabidopsis protoplasts (24-48 h post transfection). With unmasked N-terminus, GPT1 may label plastids and the ER (left panels), but with masked N-terminus only the ER (right panels). In addition to unmodified GPT1 wild-type (wt), mutant combinations S27A (non-phosphorylated), S27D (phospho-mimic) and C65S (precluding S modification) were analyzed. GPT1 dimer formation occurred at plastid rims (left panels) or ER substructures (right panels), with little impact of the S27 changes, but visible effect of C65S (hollow sphere in panel i; surrounding a peroxisome in C, arrowheads). Note that structures with BiFC signals on the right (panels f-i) are also labeled by the ER marker (most obvious in panel g). **C**, Localization of the indicated split YFP combinations in co-expression with the peroxisome (Per) marker. Note that in case of C65S, the ring-like BiFC signal surrounds a peroxisome (arrowhead). All images show maximal projections of approximately 30 optical sections (Merge; for single channel images, see Supplemental Figure 8). Organelle markers (OFP-ER or OFP-PGL3\_C-short) in magenta chlorophyll fluorescence in blue. Co-localization of yellow and magenta (or very close signals less than 200 nm) appear whitish in the Merge of all channels. Bars = 3  $\mu$ m.

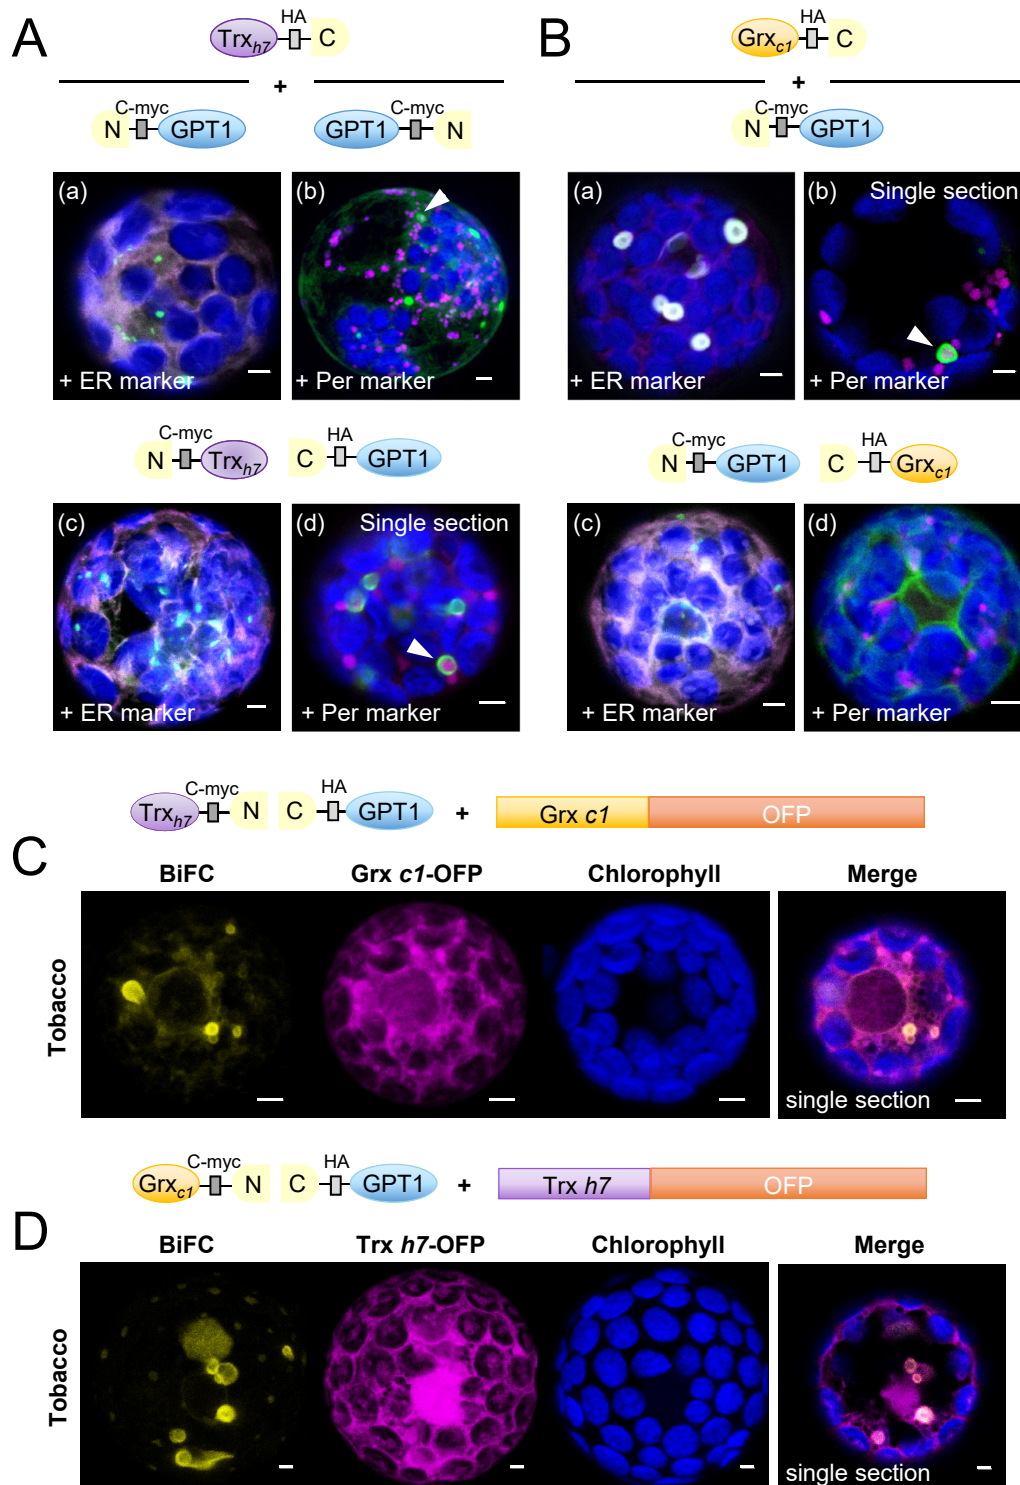

**Figure 4. GPT1 interacts with cytosolic oxidoreductases Trx<sub>h7</sub> and Grx<sub>c1</sub> at the ER.**

**A-B**, Localization of GPT1 upon interaction with Trx h7 or Grx c1 in Arabidopsis protoplasts (24-48 h post transfection). The schemes illustrate different orientation of the candidate proteins with respect to free N- and C-terminal ends. GPT1 interacts with both oxidoreductases (green signals) at the endoplasmic reticulum (ER) and its spherical sub-structures (arrowheads), except when the N-terminus of Grx c1 is masked (B, panels c and d). Note that these substructures differ from those labelled in Figure 3B. Merge of BiFC signals (green) with ER marker (OFP-ER) or peroxisome marker (Per, GFP-PGL3\_C-short) in magenta, and chlorophyll fluorescence in blue. **C-D**, Localization of split YFP reconstitution (BiFC, yellow signals) in heterologous tobacco protoplasts (24-48 h post transfection), testing a potential effect of the other oxidoreductase (co-expressed as GFP fusion, magenta). Note that similar ER substructures are labelled (Merge, single sections). All other images show maximal projections of approximately 30 optical sections. Chlorophyll fluorescence in blue. Co-localization and very close signals (less than 200 nm) appear white in the Merge of all channels. Bars = 3 µm.



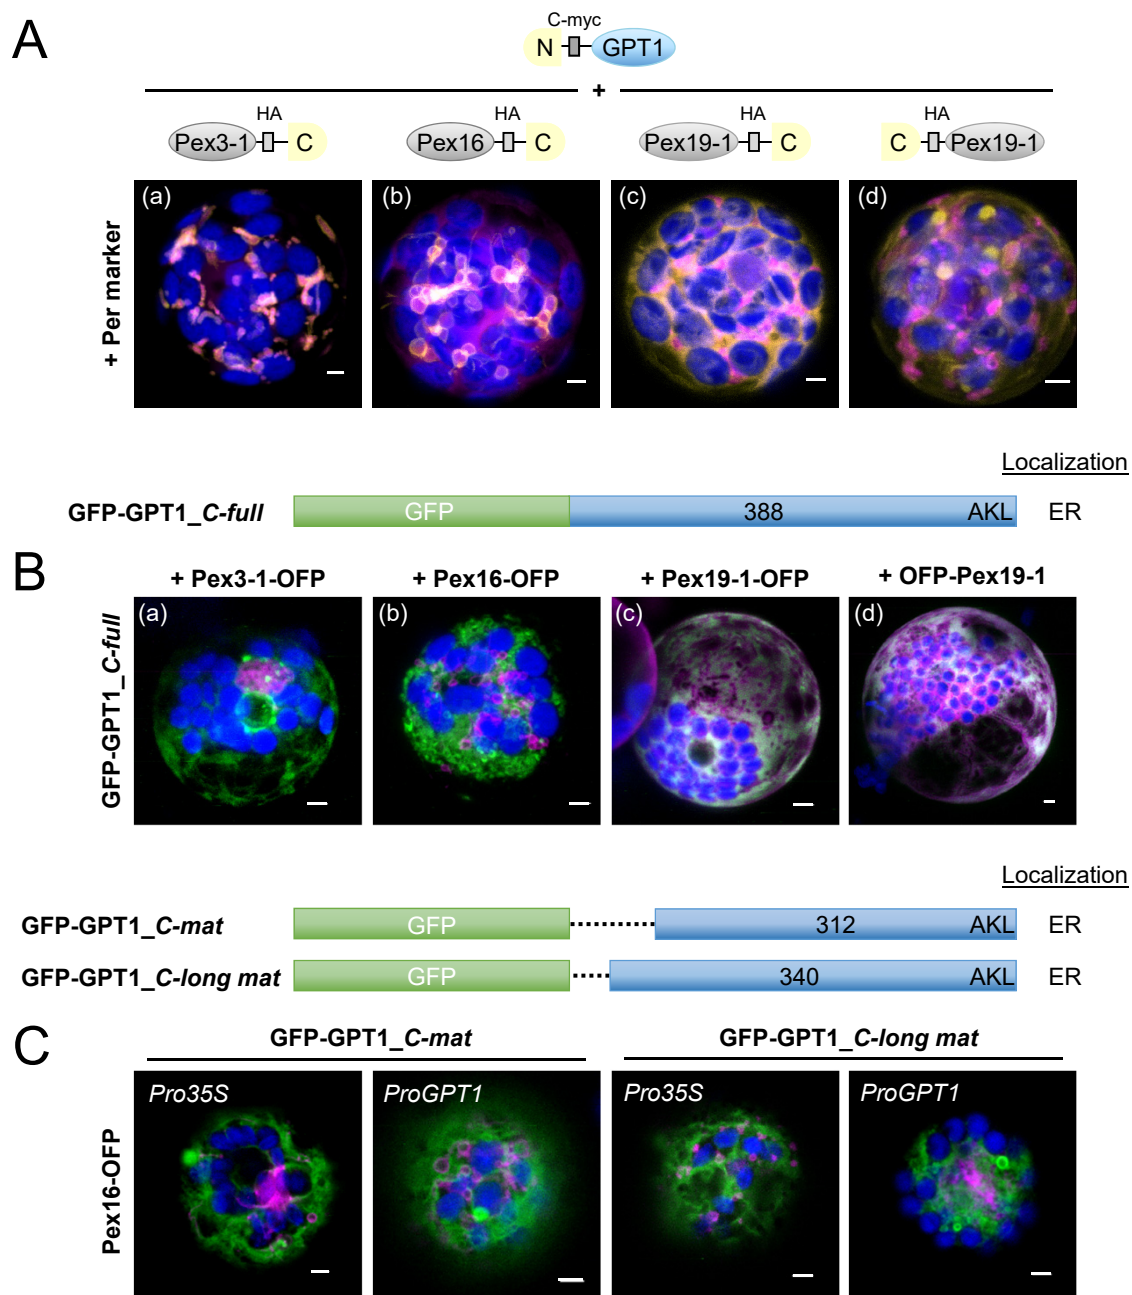

**Figure 5. Interaction versus co-localization of GPT1 with Pex factors at the ER.**

**A**, Localization of the indicated split YFP combinations (yellow BiFC signals) in Arabidopsis protoplasts (24-48 h post transfection). Pex3, Pex16, and Pex19 are important for sorting a class of peroxisomal membrane proteins via the ER to peroxisomes. Per; soluble peroxisome marker (OFP-PGL3\_C-short) in magenta. **B**, Co-expression of GFP-GPT1 and the corresponding Pex-OFP fusions indicates that interaction with the Pex factors is transient (isoforms Pex3-2 = At1g48635 and Pex19-2 = At5g17550 gave comparable results, not shown). Note that Pex16 co-expression has a vesiculating effect on GPT1 at the ER (Merge; for single channel images, see Supplemental Figure 10C). **A-B**, Maximal projections of approximately 30 optical sections. **C**, Co-expression of the indicated GFP-GPT1 fusions with Pex16-OFP in Arabidopsis protoplasts (72 h post transfection). The *C\_mat* version lacks the entire N-terminal part (including C65), whereas *C\_long mat* version lacks only the transit peptide (Supplemental Figure 1). Besides the 35S promoter (*Pro35S*), these GFP fusions were also expressed from the GPT1 promoter (*ProGPT1*), with similar results. Images show single optical sections (Merge; for single channel images, see Supplemental Figure 11). GFP fusions in green, Pex16-OFP in magenta and chlorophyll fluorescence in blue. Co-localization of green and magenta (or very close signals less than 200 nm) appear white in the Merge of all channels. Bars = 3  $\mu$ m.

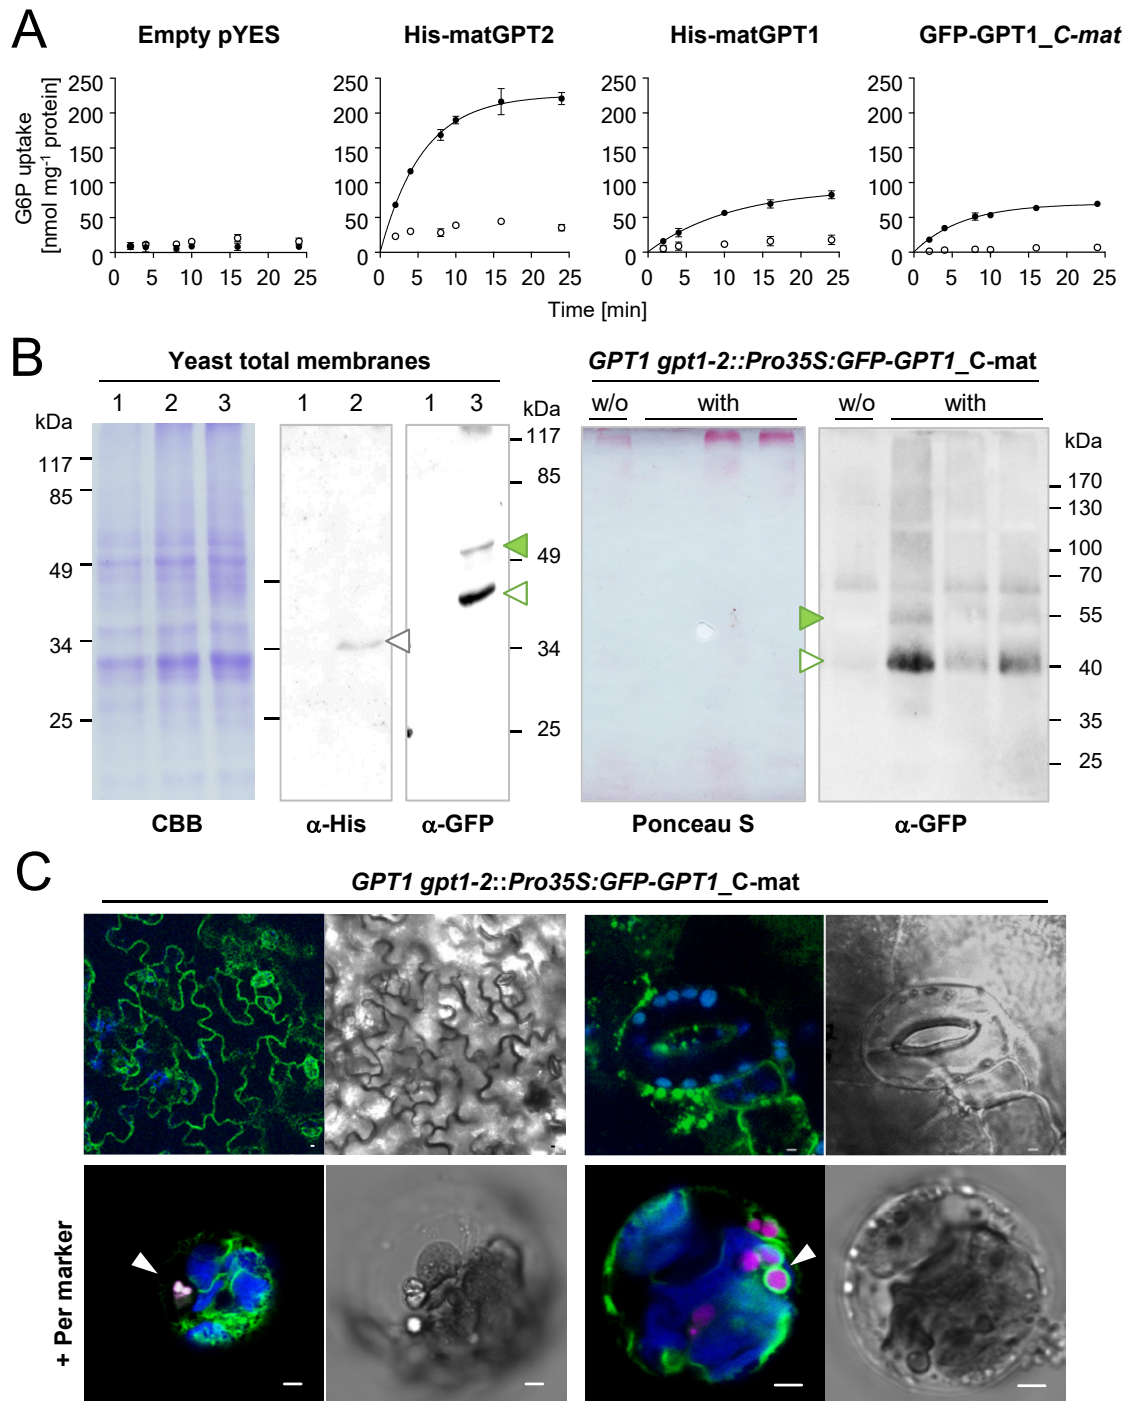

**Figure 6. Transport activity and localization of mature GPT1 in yeast and plant cells.**

**A**, Time-dependent uptake of radioactively labeled [ $^{14}$ C]-G6P (0.2 mM) into reconstituted proteoliposomes preloaded with 10 mM Pi (closed symbols) or without exchange substrate (open symbols) prepared from yeast cells harboring the empty vector (pYES) or the indicated GPT constructs. Note that transport rates of GPT1 are not influenced by the N-terminal tag (compare His-matGPT1 to GFP-matGPT1). In all graphs, the arithmetic mean of 3 technical replicates ( $\pm$ SD) was plotted against time (see Table 1 for substrate specificities). **B**, Immunoblot analysis upon expression in yeast and plant cells. Left, SDS gel of total yeast membrane fractions, stained with Coomassie brilliant blue (CBB) or blot detection by anti-His ( $\alpha$ -His) or anti-GFP ( $\alpha$ -GFP) antibodies: 1, empty vector; 2, His-matGPT1 (grey open triangle); 3, GFP-matGPT1 (green closed and open triangles). Right, blotted pellet fractions of leaf extracts (without detergent) prepared from *Arabidopsis GPT1 gpt1-2::Pro35S::GFP-GPT1\_C-mat* plants (T2 progeny without (w/o) or with the transgene) developed with anti-GFP ( $\alpha$ -GFP) antibodies. The Ponceau S-stained blot serves as loading reference. Note that GFP-GPT1 (closed green and open triangles) extracted from yeast or plant membranes migrate similarly. Bands of molecular masses are indicated (kDa). **C**, Localization of GFP-GPT1 in heterozygous *GPT1 gpt1-2* plants. Top, Green net-like structures (ER) in leaf epidermal cells (left), and spherical structures in seedlings (right); bars = 10  $\mu$ m. Bottom, Pattern upon protoplast preparation and transfection with the peroxisome marker (Per; OFP-PGL3\_C-short, magenta) in membranes surrounding peroxisomes (arrowheads). Chlorophyll fluorescence in blue. All images show single optical sections. Co-localization (and very close signals less than 200 nm) appear white in the Merge of all channels (bright field images shown as reference). Bars = 3  $\mu$ m.

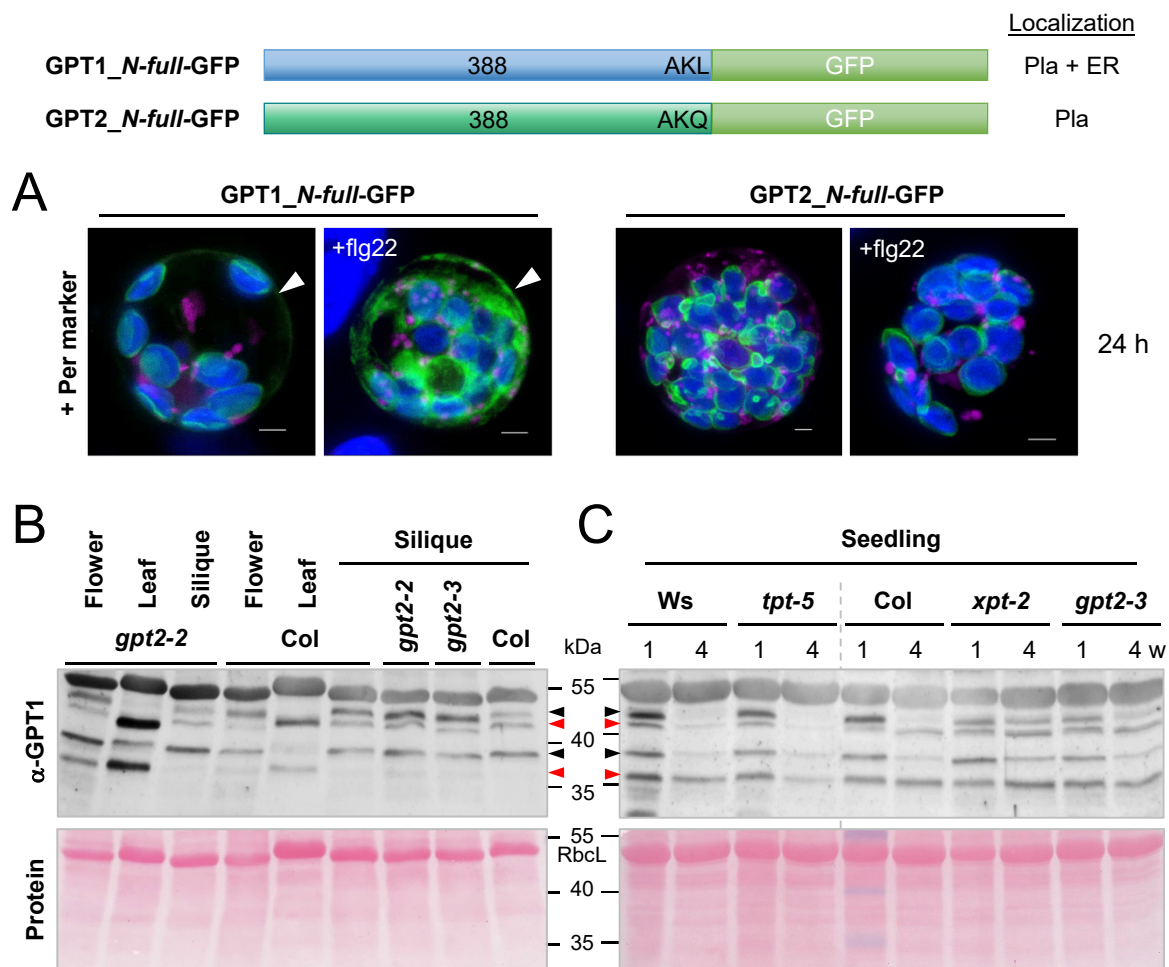

**Figure 7. GPT1 detection at the ER is increased by stress treatment and in reproductive Arabidopsis tissues.**

**A**, Arabidopsis protoplasts were co-transfected with the indicated GPT-GFP fusions and the peroxisome marker (Per, OFP-PGL3\_C-short), samples were split in half, one was treated with 0.2  $\mu$ M flagellin peptide (+flg22), and the other mock-incubated for 24 h. Note that flg22 treatment did not change GPT localization to plastids, but enhanced the ER fraction of GPT1-GFP (arrowheads). All images show maximal projections of approximately 30 single sections (Merge; for single channel images, see Supplemental Figure S13). GFP fusions in green, peroxisome marker in magenta, and chlorophyll fluorescence in blue. Co-localization of magenta and green or very close signals (less than 200 nm) appear white in the Merge of all channels. Bars = 3  $\mu$ m. **B-C**, Protein extracts (without detergent) of flower, leaf, and (green) silique tissue were prepared from wild-type plants (Col, Ws) and the indicated homozygous mutant lines. Supernatant fractions were separated on 10% SDS gels and blotted to nitrocellulose. After Ponceau-S staining, the blots were developed with GPT1-specific antibodies ( $\alpha$ -GPT1) raised against the N-terminus with His-tag (Supplemental Figure S14). Arrowheads mark double bands of full-length GPT1 (predicted size: 42.3 kDa) and mature GPT1 (ca. 37-39 kDa, depending on TP processing). Red arrowheads point to bands suspected to represent a largely 'off' situation and black arrowheads the corresponding 'on' situation at either location (as deduced from comparison of leaf to silique tissue), likely due to protein modification. **C**, Immunoblot of seedlings harvested from germination plates (1% sucrose) after 1- or 4-week (w) growth in short-day regime. Included mutant alleles: *gpt2-2* (GK-950D09, T-DNA intron 2/exon 3), *gpt2-3* (GK-780F12, T-DNA in exon 4), *tpt-5* (FLAG\_124C02, T-DNA in exon 9), and *xpt-2* (SAIL\_378C01, single exon; Hilgers et al., 2018). Note that the band pattern differs in OPPP-relevant *gpt2* and *xpt* transporter mutants compared to Col wildtype and *tpt-5* (Ws wildtype corresponds to *tpt-5*, grey dashed line). Ponceau S-stained blots (protein) are shown as loading reference; RbcL, large subunit of RubisCO. Molecular masses are indicated in kDa (PageRuler Prestained Protein Ladder, Fermentas).

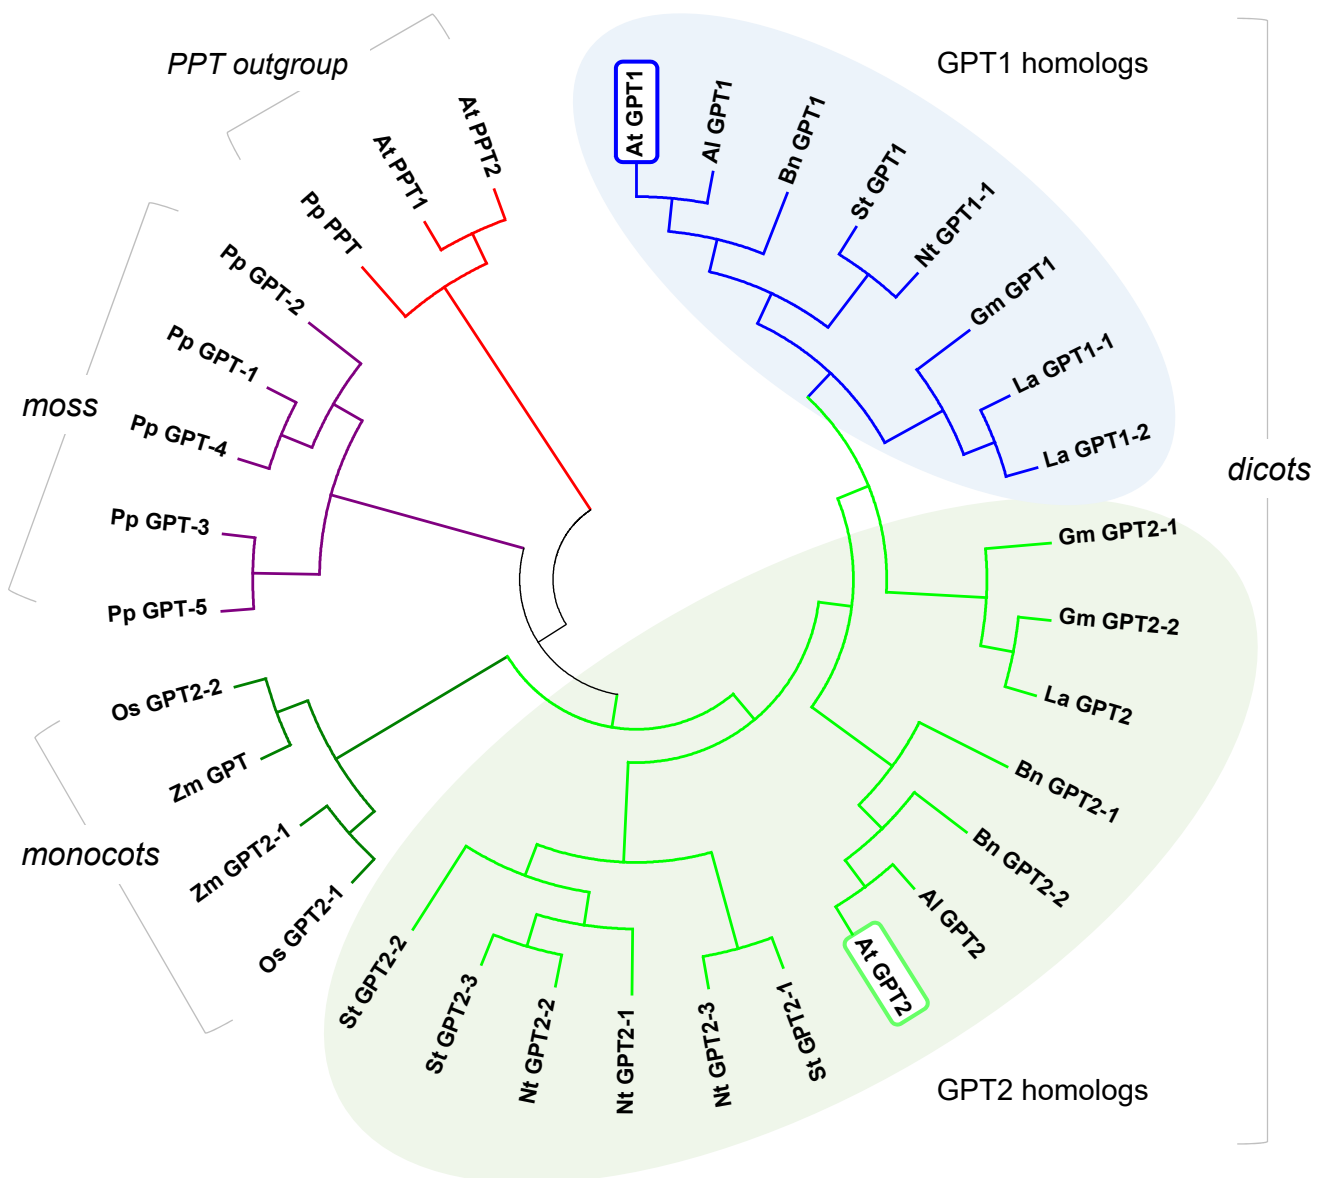

**Figure 8. Phylogenetic analysis of GPT sequences from different plant clades.**

Selected GPT isoforms of the *Brassicaceae*, *Fabaceae*, *Solanaceae* and *Poaceae* in comparison to the moss *Physcomitrella patens*. The phosphoenolpyruvate/phosphate translocator (PPT) accessions serve as outgroup (red). Glucose-6-phosphate/phosphate translocators (GPT) of *Physcomitrella patens* (Pp, violet) form the base of the phylogenetic tree. GPT2 accessions (green) of monocotyledonous plants split off early (monocots, dark green), whereas the GPT1 accessions (blue) split much later from the GPT2 accessions (light green) in the dicotyledonous branch (dicots, right). For sequence identifications see Table S3. Abbreviations: *Al*: *Arabidopsis lyrata* subsp. *lyrata*; *At*: *Arabidopsis thaliana*; *Bn*: *Brassica napus*; *Gm*: *Glycine max*; *La*: *Lupinus angustifolius*; *Nt*: *Nicotiana tabacum*; *Os*: *Oryza sativa*; *St*: *Solanum tuberosum*; *Zm*: *Zea mays*. Evolutionary history was inferred by using the Maximum Likelihood method based on the JTT matrix-based model (Jones et al., 1992). The tree with highest log likelihood (-5414.98) is shown. Initial tree(s) for the heuristic search were obtained automatically by applying Neighbor-Join and BioNJ algorithms to a matrix of pairwise distances estimated using a JTT model, and then selecting the topology with superior log likelihood value. The tree is drawn to scale, with branch lengths measured in the number of substitutions per site. The analysis involved 34 amino acid sequences (Supplemental Table 3). All positions containing gaps and missing data were eliminated. There were a total of 252 positions in the final dataset. Evolutionary analyses were conducted in MEGA7 (Kumar et al., 2016).



A

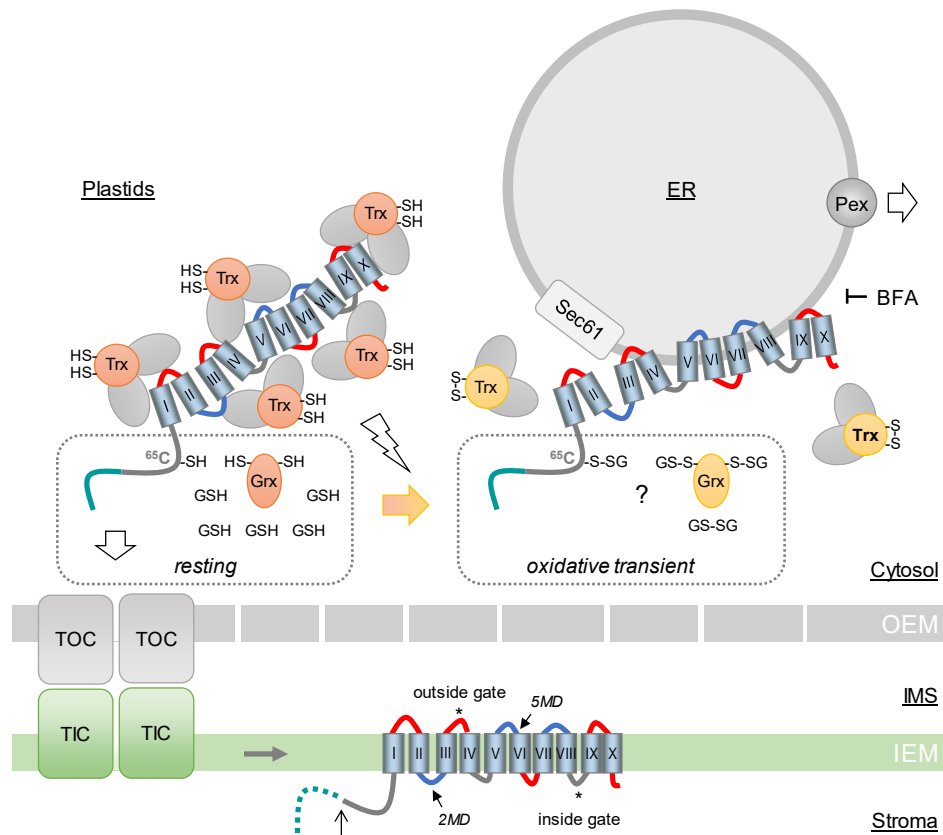

B

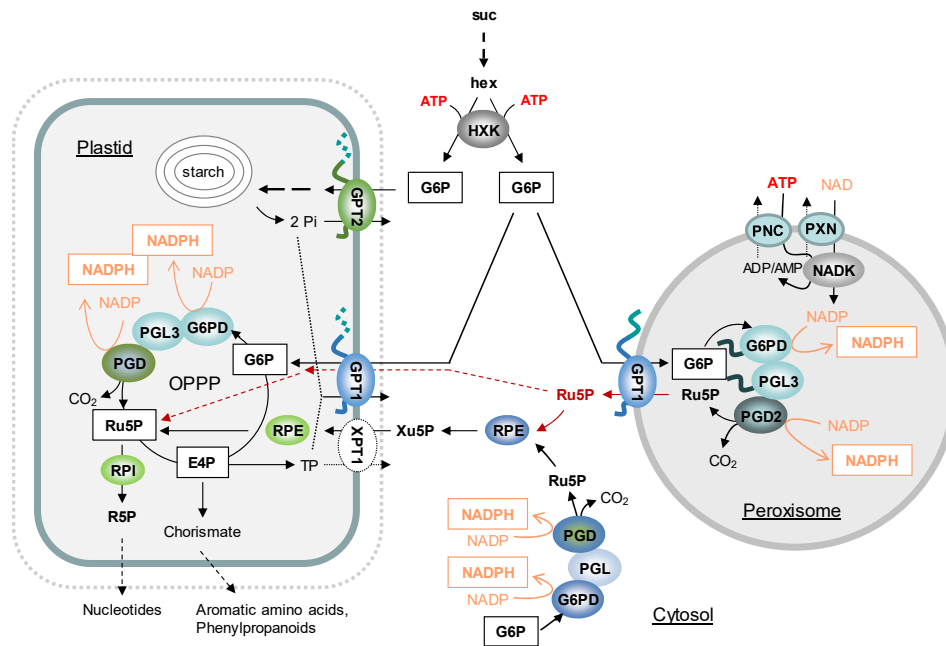

**Figure 9. Model of dual GPT1 targeting for OPPP function in plastids and peroxisomes.**

**A**, GPT1 precursors in the cytosol are covered with chaperons (grey spheres) and co-chaperons Trx<sub>h7</sub> and Grx<sub>c1</sub> as putative redox sensors/transmitters (orange = reduced state, -SH; yellow = oxidized state, -S-S-). The hydrophobic membrane domains (barrels) of GPT1 are labeled with roman numerals. Hinge regions of negative net charge (blue) may facilitate ER insertion. Left, In largely reduced state of the cytosolic glutathione pool (GSH), the N-terminus of GPT1 (green) enters the TOC/TIC complex (translocon of the outer/inner chloroplast envelope), the membrane domains (MDs) integrate into the inner envelope membrane (IEM), and the transit peptide is processed (open arrow)/degraded in the stroma (dotted line). Local oxidation (flash sign) of the cytosolic glutathione pool (GS-SG) likely retains GPT1 in the cytosol by a functional change in the bound redox transmitters (Grx<sub>c1</sub> and Trx<sub>h7</sub>). Whether this involves <sup>65</sup>C in the GPT1 N-terminus is unclear (question mark). ER insertion involves Sec61 and sorting to peroxisomal membranes specific peroxins (Pex). Brefeldin A (BFA) blocked ER import of GPT1. **B**, Scheme of sugar metabolism in a physiological sink state. Sucrose (suc) is cleaved by cytosolic invertase yielding two hexoses (hex) that are activated by hexokinase (HXK), consuming ATP provided by glycolysis and mitochondrial respiration (not shown). By contrast to GPT2, GPT1 imports G6P into both plastids (in exchange for Pi released by GPT2-driven starch synthesis) and peroxisomes (in exchange for Ru5P that may also enter plastids via GPT1, dashed red arrows), yielding 2 moles of NADPH in the oxidative part of the OPPP. NADP inside peroxisomes is formed by NAD kinase (NADK3) that relies on ATP and NAD imported into peroxisomes via PNC (At3g05290; At5g27520) and PXN (At2g39970). The cytosolic OPPP reactions are usually linked via RPE and XPT to the complete pathway in the plastid stroma. Abbreviations: G6PD, glucose-6-phosphate dehydrogenase; PGL, 6-phosphogluconolactonase; PGD, 6-phosphogluconate dehydrogenase; RPE, ribulosephosphate-3-epimerase; RPI, ribose-5-phosphate isomerase.

## Parsed Citations

**Ackerley, S., Thornhill, P., Grierson, A.J., Brownlees, J., Anderton, B.H., Leigh, P.N., Shaw, C.E., and Miller, C.C.J. (2003).** Neurofilament heavy chain side arm phosphorylation regulates axonal transport of neurofilaments. *J. Cell Biol.* 161: 489–495.

Pubmed: [Author and Title](#)

Google Scholar: [Author Only Title Only Author and Title](#)

**Aicart-Ramos, C., Valero, R.A., and Rodriguez-Crespo, I. (2011).** Protein palmitoylation and subcellular trafficking. *Biochim. Biophys. Acta* 1808: 2981–2994.

Pubmed: [Author and Title](#)

Google Scholar: [Author Only Title Only Author and Title](#)

**Andriotis, V.M.E., Pike, M.J., Bunnewell, S., Hills, M.J., and Smith, A.M. (2010).** The plastidial glucose-6-phosphate/phosphate antiporter GPT1 is essential for morphogenesis in *Arabidopsis* embryos. *Plant J.* 64: 128–139.

Pubmed: [Author and Title](#)

Google Scholar: [Author Only Title Only Author and Title](#)

**Andriotis, V.M.E. and Smith, A.M. (2019).** The plastidial pentose phosphate pathway is essential for postglobular embryo development in *Arabidopsis*. *Proc. Natl. Acad. Sci. U. S. A.* 116: 15297–15306.

Pubmed: [Author and Title](#)

Google Scholar: [Author Only Title Only Author and Title](#)

**Aranovich, A., Hua, R., Rutenberg, A.D., and Kim, P.K. (2014).** PEX16 contributes to peroxisome maintenance by constantly trafficking PEX3 via the ER. *J. Cell Sci.* 127: 3675–3686.

Pubmed: [Author and Title](#)

Google Scholar: [Author Only Title Only Author and Title](#)

**Athanasίου, K., Dyson, B.C., Webster, R.E., and Johnson, G.N. (2010).** Dynamic Acclimation of Photosynthesis Increases Plant Fitness in Changing Environments. *Plant Physiol.* 152: 366–373.

Pubmed: [Author and Title](#)

Google Scholar: [Author Only Title Only Author and Title](#)

**Baslam, M., Oikawa, K., Kitajima-Koga, A., Kaneko, K., and Mitsui, T. (2016).** Golgi-to-plastid trafficking of proteins through secretory pathway: Insights into vesicle-mediated import toward the plastids. *Plant Signal. Behav.* 11: e1221558 (5 pages).

Pubmed: [Author and Title](#)

Google Scholar: [Author Only Title Only Author and Title](#)

**Berndt, C., Lillig, C.H., and Holmgren, A. (2008).** Thioredoxins and glutaredoxins as facilitators of protein folding. *Biochim. Biophys. Acta - Mol. Cell Res.* 1783: 641–650.

Pubmed: [Author and Title](#)

Google Scholar: [Author Only Title Only Author and Title](#)

**Cakir, B., Shiraishi, S., Tuncel, A., Matsusaka, H., Satoh, R., Singh, S., Crofts, N., Hosaka, Y., Fujita, N., Hwang, S.-K., Satoh, H., and Okita, T.W. (2016).** Analysis of the Rice ADP-Glucose Transporter (OsBT1) Indicates the Presence of Regulatory Processes in the Amyloplast Stroma That Control ADP-Glucose Flux into Starch. *Plant Physiol.* 170: 1271–1283.

Pubmed: [Author and Title](#)

Google Scholar: [Author Only Title Only Author and Title](#)

**Cavalier-Smith, T. (2009).** Predation and eukaryote cell origins: A coevolutionary perspective. *Int. J. Biochem. Cell Biol.* 41: 307–322.

Pubmed: [Author and Title](#)

Google Scholar: [Author Only Title Only Author and Title](#)

**Chen, J., Lalonde, S., Obrdlik, P., Noorani Vatani, A., Parsa, S.A., Vilarino, C., Revuelta, J.L., Frommer, W.B., and Rhee, S.Y. (2012).** Uncovering *Arabidopsis* Membrane Protein Interactome Enriched in Transporters Using Mating-Based Split Ubiquitin Assays and Classification Models. *Front. Plant Sci.* 3: 1–14.

Pubmed: [Author and Title](#)

Google Scholar: [Author Only Title Only Author and Title](#)

**Chua, N.-H. and Schmidt, G.W. (1979).** Transport of Proteins into Mitochondria and Chloroplasts. *J. Cell Biol.* 81: 461–483.

Pubmed: [Author and Title](#)

Google Scholar: [Author Only Title Only Author and Title](#)

**Clough, S.J. and Bent, A.F. (1998).** Floral dip: a simplified method for *Agrobacterium*-mediated transformation of *Arabidopsis thaliana*. *Plant J.* 16: 735–743.

Pubmed: [Author and Title](#)

Google Scholar: [Author Only Title Only Author and Title](#)

**Considine, M.J. and Foyer, C.H. (2014).** Redox Regulation of Plant Development. *Antioxid. Redox Signal.* 21: 1305–1326.

Pubmed: [Author and Title](#)

Google Scholar: [Author Only Title Only Author and Title](#)

**Corpas, F.J., Barroso, J.B., Sandalio, L.M., Distefano, S., Palma, J.M., Lupiáñez, J.A., and del Río, L.A. (1998).** A dehydrogenase-mediated recycling system of NADPH in plant peroxisomes. *Biochem. J.* 330: 777–784.

Pubmed: [Author and Title](#)

Google Scholar: [Author Only](#) [Title Only](#) [Author and Title](#)

**dal Santo, S., Stampfl, H., Krasensky, J., Kempa, S., Gibon, Y., Petutschnig, E., Rozhon, W., Heuck, A., Clausen, T., and Jonak, C. (2012). Stress-Induced GSK3 Regulates the Redox Stress Response by Phosphorylating Glucose-6-Phosphate Dehydrogenase in Arabidopsis. *Plant Cell* 24: 3380–3392.**

Pubmed: [Author and Title](#)

Google Scholar: [Author Only](#) [Title Only](#) [Author and Title](#)

**Dennis, D.T., Layzell, D.B., Lefebvre, D.D., and Turpin, D.H. (1997). *Plant metabolism* 2nd Edition. D.T. Dennis, D.B. Layzell, D.D. Lefebvre, and D.H. Turpin, eds (Prentice Hall College Div, Prentice Hall Inc., New Jersey).**

Pubmed: [Author and Title](#)

Google Scholar: [Author Only](#) [Title Only](#) [Author and Title](#)

**Dietz, K.-J. (2011). Peroxiredoxins in plants and cyanobacteria. *Antioxid. Redox Signal.* 15: 1129–1159.**

Pubmed: [Author and Title](#)

Google Scholar: [Author Only](#) [Title Only](#) [Author and Title](#)

**Durek, P., Schmidt, R., Heazlewood, J.L., Jones, A., MacLean, D., Nagel, A., Kersten, B., and Schulze, W.X. (2009). PhosPhAt: The Arabidopsis thaliana phosphorylation site database. An update. *Nucleic Acids Res.* 38: 828–834.**

Pubmed: [Author and Title](#)

Google Scholar: [Author Only](#) [Title Only](#) [Author and Title](#)

**Dyson, B.C., Allwood, J.W., Feil, R., Xu, Y., Miller, M., Bowsher, C.G., Goodacre, R., Lunn, J.E., and Johnson, G.N. (2015). Acclimation of metabolism to light in Arabidopsis thaliana: The glucose 6-phosphate/phosphate translocator GPT2 directs metabolic acclimation. *Plant, Cell Environ.* 38: 1404–1417.**

Pubmed: [Author and Title](#)

Google Scholar: [Author Only](#) [Title Only](#) [Author and Title](#)

**Dyson, B.C., Webster, R.E., and Johnson, G.N. (2014). GPT2: A glucose 6-phosphate/phosphate translocator with a novel role in the regulation of sugar signalling during seedling development. *Ann. Bot.* 113: 643–652.**

Pubmed: [Author and Title](#)

Google Scholar: [Author Only](#) [Title Only](#) [Author and Title](#)

**Eicks, M., Maurino, V., Knappe, S., Flügge, U.-I., and Fischer, K. (2002). The plastidic pentose phosphate translocator represents a link between the cytosolic and the plastidic pentose phosphate pathways in plants. *Plant Physiol.* 128: 512–522.**

Pubmed: [Author and Title](#)

Google Scholar: [Author Only](#) [Title Only](#) [Author and Title](#)

**Eubel, H., Meyer, E.H., Taylor, N.L., Bussell, J.D., O'Toole, N., Heazlewood, J.L., Castleden, I., Small, I.D., Smith, S.M., and Millar, A.H. (2008). Novel proteins, putative membrane transporters, and an integrated metabolic network are revealed by quantitative proteomic analysis of Arabidopsis cell culture peroxisomes. *Plant Physiol.* 148: 1809–29.**

Pubmed: [Author and Title](#)

Google Scholar: [Author Only](#) [Title Only](#) [Author and Title](#)

**Fancy, N.N., Bahlmann, A.-K., and Loake, G.J. (2016). Nitric oxide function in plant abiotic stress. *Plant. Cell Environ.*: 1–11.**

Pubmed: [Author and Title](#)

Google Scholar: [Author Only](#) [Title Only](#) [Author and Title](#)

**Fernández-Fernández, Á.D. and Corpas, F.J. (2016). In Silico Analysis of Arabidopsis thaliana Peroxisomal 6-Phosphogluconate Dehydrogenase. *Scientifica (Cairo)*. 2016.**

Pubmed: [Author and Title](#)

Google Scholar: [Author Only](#) [Title Only](#) [Author and Title](#)

**Flügge, U.-I. (1999). Phosphate Translocators in Plastids. *Annu. Rev. Plant Physiol. Plant Mol. Biol.* 50: 27–45.**

Pubmed: [Author and Title](#)

Google Scholar: [Author Only](#) [Title Only](#) [Author and Title](#)

**Flügge, U.-I., Häusler, R.E., Ludewig, F., and Gierth, M. (2011). The role of transporters in supplying energy to plant plastids. *J. Exp. Bot.* 62: 2381–2392.**

Pubmed: [Author and Title](#)

Google Scholar: [Author Only](#) [Title Only](#) [Author and Title](#)

**Foyer, C.H., Bloom, A.J., Queval, G., and Noctor, G. (2009). Photorespiratory metabolism: genes, mutants, energetics, and redox signaling. *Annu. Rev. Plant Biol.* 60: 455–484.**

Pubmed: [Author and Title](#)

Google Scholar: [Author Only](#) [Title Only](#) [Author and Title](#)

**Geigenberger, P., Kolbe, A., and Tiessen, A. (2005). Redox regulation of carbon storage and partitioning in response to light and sugars. *J. Exp. Bot.* 56: 1469–1479.**

Pubmed: [Author and Title](#)

Google Scholar: [Author Only](#) [Title Only](#) [Author and Title](#)

**Gietz, R.D. and Schiestl, R.H. (2007). High-efficiency yeast transformation using the LiAc/SS carrier DNA/PEG method. *Nat. Protoc.* 2: 31–34.**

Pubmed: [Author and Title](#)

Google Scholar: [Author Only](#) [Title Only](#) [Author and Title](#)

**Goder, V., Junne, T., and Spiess, M. (2004).** Sec61p Contributes to Signal Sequence Orientation According to the Positive-Inside Rule. *Mol. Biol. Cell* 15: 1470–1478.

Pubmed: [Author and Title](#)

Google Scholar: [Author Only](#) [Title Only](#) [Author and Title](#)

**Gong, F.-C., Giddings, T.H., Meehl, J.B., Staehelin, L.A., and Galbraith, D.W. (1996).** Z-membranes: artificial organelles for overexpressing recombinant integral membrane proteins. *Proc. Natl. Acad. Sci. U. S. A.* 93: 2219–2223.

Pubmed: [Author and Title](#)

Google Scholar: [Author Only](#) [Title Only](#) [Author and Title](#)

**Gould, S.J., Keller, G.-A., Hosken, N., Wilkinson, J., and Subramani, S. (1989).** A Conserved Tripeptide Sorts Proteins to Peroxisomes. *J. Cell Biol.* 108: 1657–1664.

Pubmed: [Author and Title](#)

Google Scholar: [Author Only](#) [Title Only](#) [Author and Title](#)

**Greaves, J., Salaun, C., Fukata, Y., Fukata, M., and Chamberlain, L.H. (2008).** Palmitoylation and membrane interactions of the neuroprotective chaperone cysteine-string protein. *J. Biol. Chem.* 283: 25014–25026.

Pubmed: [Author and Title](#)

Google Scholar: [Author Only](#) [Title Only](#) [Author and Title](#)

**Guevara-Garcia, A., Mosqueda-Cano, G., Argüello-Astorga, G., Simpson, J., and Herrera-Estrella, L. (1993).** Tissue-specific and wound-inducible pattern of expression of the mannopine synthase promoter is determined by the interaction between positive and negative cis-regulatory elements. *Plant J.* 4: 495–505.

Pubmed: [Author and Title](#)

Google Scholar: [Author Only](#) [Title Only](#) [Author and Title](#)

**Gurrieri, L., Distefano, L., Pirone, C., Horrer, D., Seung, D., Zaffagnini, M., Rouhier, N., Trost, P., Santelia, D., and Sparla, F. (2019).** The Thioredoxin-Regulated  $\alpha$ -Amylase 3 of *Arabidopsis thaliana* Is a Target of S-Glutathionylation. *Front. Plant Sci.* 10: 993.

Pubmed: [Author and Title](#)

Google Scholar: [Author Only](#) [Title Only](#) [Author and Title](#)

**Hadden, D. a, Phillipson, B. a, Johnston, K. a, Brown, L.-A, Manfield, I.W, El-Shami, M., Sparkes, I. a, and Baker, A (2006).** *Arabidopsis* PEX19 is a dimeric protein that binds the peroxin PEX10. *Mol. Membr. Biol.* 23: 325–236.

Pubmed: [Author and Title](#)

Google Scholar: [Author Only](#) [Title Only](#) [Author and Title](#)

**Hauschild, R. and von Schaewen, A (2003).** Differential regulation of glucose-6-phosphate dehydrogenase isoenzyme activities in potato. *Plant Physiol.* 133: 47–62.

Pubmed: [Author and Title](#)

Google Scholar: [Author Only](#) [Title Only](#) [Author and Title](#)

**Heazlewood, J.I., Durek, P., Hummel, J., Selbig, J., Weckwerth, W., Walther, D., and Schulze, W.X. (2008).** PhosPhAt : A database of phosphorylation sites in *Arabidopsis thaliana* and a plant-specific phosphorylation site predictor. *Nucleic Acids Res.* 36: 1015–1021.

Pubmed: [Author and Title](#)

Google Scholar: [Author Only](#) [Title Only](#) [Author and Title](#)

**von Heijne, G. (1986).** Net N-C charge imbalance may be important for signal sequence function in bacteria. *J. Mol. Biol.* 192: 287–290.

Pubmed: [Author and Title](#)

Google Scholar: [Author Only](#) [Title Only](#) [Author and Title](#)

**Hemsley, P.A (2015).** The importance of lipid modified proteins in plants. *New Phytol.* 205: 476–489.

Pubmed: [Author and Title](#)

Google Scholar: [Author Only](#) [Title Only](#) [Author and Title](#)

**Hilgers, E.J.A, Schöttler, M.A, Mettler-Altmann, T., Krueger, S., Dörmann, P., Eicks, M., Flügge, U.I., and Häusler, R.E. (2018).** The combined loss of triose phosphate and xylulose 5-phosphate/phosphate translocators leads to severe growth retardation and impaired photosynthesis in *arabidopsis thaliana* tpt/xpt double mutants. *Front. Plant Sci.* 9.

Pubmed: [Author and Title](#)

Google Scholar: [Author Only](#) [Title Only](#) [Author and Title](#)

**Hölscher, C., Lutterbey, M.-C., Lansing, H., Meyer, T., Fischer, K., and von Schaewen, A (2016).** Defects in peroxisomal 6-phosphogluconate dehydrogenase isoform PGD2 prevent gametophytic interaction in *Arabidopsis thaliana*. *Plant Physiol.*: pp.15.01301-

Pubmed: [Author and Title](#)

Google Scholar: [Author Only](#) [Title Only](#) [Author and Title](#)

**Hölscher, C., Meyer, T., and Von Schaewen, A (2014).** Dual-targeting of *arabidopsis* 6-phosphogluconolactonase 3 (PGL3) to chloroplasts and peroxisomes involves interaction with Trx m2 in the cytosol. *Mol. Plant* 7: 252–255.

Pubmed: [Author and Title](#)

Google Scholar: [Author Only](#) [Title Only](#) [Author and Title](#)

**Hua, R., Gidda, S.K., Aranovich, A, Mullen, R.T., and Kim, P.K. (2015).** Multiple Domains in PEX16 Mediate Its Trafficking and Recruitment of Peroxisomal Proteins to the ER. *Traffic*: n/a-n/a.



- Pubmed: [Author and Title](#)  
Google Scholar: [Author Only Title Only Author and Title](#)
- Hunt, J.E. and Trelease, R.N. (2004).** Sorting pathway and molecular targeting signals for the Arabidopsis peroxin 3. *Biochem. Biophys. Res. Commun.* 314: 586–596.  
Pubmed: [Author and Title](#)  
Google Scholar: [Author Only Title Only Author and Title](#)
- Hutchings, D., Rawsthorne, S., and Emes, M.J. (2005).** Fatty acid synthesis and the oxidative pentose phosphate pathway in developing embryos of oilseed rape (*Brassica napus* L.). *J. Exp. Bot.* 56: 577–585.  
Pubmed: [Author and Title](#)  
Google Scholar: [Author Only Title Only Author and Title](#)
- Jones, A.M. et al. (2014).** Border Control - A Membrane-Linked Interactome of Arabidopsis. *Science* (80-. ). 344: 711–716.  
Pubmed: [Author and Title](#)  
Google Scholar: [Author Only Title Only Author and Title](#)
- Jones, D.T., Taylor, W.R., and Thornton, J.M. (1992).** The rapid generation of mutation data matrices from protein sequences. *Comput. Appl. Biosci.* 8: 275–282.  
Pubmed: [Author and Title](#)  
Google Scholar: [Author Only Title Only Author and Title](#)
- Kammerer, B., Fischer, K., Hilpert, B., Schubert, S., Gutensohn, M., Weber, A., and Flügge, U.-I. (1998).** Molecular Characterization of a Carbon Transporter in Plastids from Heterotrophic Tissues: The Glucose 6-Phosphate/Phosphate Antiporter. *Plant Cell* 10: 105–117.  
Pubmed: [Author and Title](#)  
Google Scholar: [Author Only Title Only Author and Title](#)
- Kao, Y.T., Gonzalez, K.L., and Bartel, B. (2018).** Peroxisome function, biogenesis, and dynamics in plants. *Plant Physiol.* 176: 162–177.  
Pubmed: [Author and Title](#)  
Google Scholar: [Author Only Title Only Author and Title](#)
- Karnik, S.K. and Trelease, R.N. (2005).** Arabidopsis peroxin 16 coexists at steady state in peroxisomes and endoplasmic reticulum. *Plant Physiol.* 138: 1967–1981.  
Pubmed: [Author and Title](#)  
Google Scholar: [Author Only Title Only Author and Title](#)
- Kataya, A. and Reumann, S. (2010).** Arabidopsis glutathione reductase 1 is dually targeted to peroxisomes and the cytosol. *Plant Signal. Behav.* 5: 171–175.  
Pubmed: [Author and Title](#)  
Google Scholar: [Author Only Title Only Author and Title](#)
- Kim, P.K. and Hettema, E.H. (2015).** Multiple Pathways for Protein Transport to Peroxisomes. *J. Mol. Biol.* 427: 1176–1190.  
Pubmed: [Author and Title](#)  
Google Scholar: [Author Only Title Only Author and Title](#)
- Kim, P.K. and Mullen, R.T. (2013).** PEX16: a multifaceted regulator of peroxisome biogenesis. *Front. Physiol.* 4: 1–6.  
Pubmed: [Author and Title](#)  
Google Scholar: [Author Only Title Only Author and Title](#)
- Klausner, R.D., Donaldson, J.G., and Lippincott-Schwartz, J. (1992).** Brefeldin A: Insights into the control of membrane traffic and organelle structure. *J. Cell Biol.* 116: 1071–1080.  
Pubmed: [Author and Title](#)  
Google Scholar: [Author Only Title Only Author and Title](#)
- Knappe, S., Flügge, U.-I., and Fischer, K. (2003).** Analysis of the plastidic phosphate translocator gene family in Arabidopsis and identification of new phosphate translocator-homologous transporters, classified by their putative substrate-binding site. *Plant Physiol.* 131: 1178–1190.  
Pubmed: [Author and Title](#)  
Google Scholar: [Author Only Title Only Author and Title](#)
- Kruger, N.J. and Von Schaewen, A. (2003).** The oxidative pentose phosphate pathway: Structure and organisation. *Curr. Opin. Plant Biol.* 6: 236–246.  
Pubmed: [Author and Title](#)  
Google Scholar: [Author Only Title Only Author and Title](#)
- Kumar, S., Stecher, G., and Tamura, K. (2016).** MEGA7: Molecular Evolutionary Genetics Analysis Version 7.0 for Bigger Datasets. *Mol. Biol. Evol.* 33: 1870–1874.  
Pubmed: [Author and Title](#)  
Google Scholar: [Author Only Title Only Author and Title](#)
- Kunz, H.-H., Häusler, R.E., Fettke, J., Herbst, K., Niewiadomski, P., Gierth, M., Bell, K., Steup, M., Flügge, U.-I., and Schneider, A. (2010).** The role of plastidial glucose-6-phosphate/phosphate translocators in vegetative tissues of Arabidopsis thaliana mutants impaired in starch biosynthesis. *Plant Biol.* 12: 115–128.  
Pubmed: [Author and Title](#)  
Google Scholar: [Author Only Title Only Author and Title](#)

- Lalonde, S. et al. (2010). A membrane protein / signaling protein interaction network for Arabidopsis version AMPv2. *Front. Physiol.* 1: 1–14.  
Pubmed: [Author and Title](#)  
Google Scholar: [Author Only](#) [Title Only](#) [Author and Title](#)
- Landi, S., Nurcato, R., De Lillo, A., Lentini, M., Grillo, S., and Esposito, S. (2016). Glucose-6-phosphate dehydrogenase plays a central role in the response of tomato (*Solanum lycopersicum*) plants to short and long-term drought. *Plant Physiol. Biochem.* 105: 79–89.  
Pubmed: [Author and Title](#)  
Google Scholar: [Author Only](#) [Title Only](#) [Author and Title](#)
- Lansing, H., Doering, L., Fischer, K., Baune, M.-C., and von Schaewen, A. (2019). Analysis of potential redundancy among Arabidopsis 6-phosphogluconolactonase (PGL) isoforms in peroxisomes. *J. Exp. Bot.*  
Pubmed: [Author and Title](#)  
Google Scholar: [Author Only](#) [Title Only](#) [Author and Title](#)
- Lee, S.K., Eom, J.S., Hwang, S.K., Shin, D., An, G., Okita, T.W., and Jeon, J.S. (2016). Plastidic phosphoglucomutase and ADP-glucose pyrophosphorylase mutants impair starch synthesis in rice pollen grains and cause male sterility. *J. Exp. Bot.* 67: 5557–5569.  
Pubmed: [Author and Title](#)  
Google Scholar: [Author Only](#) [Title Only](#) [Author and Title](#)
- Lee, Y., Nishizawa, T., Takemoto, M., Kumazaki, K., Yamashita, K., Hirata, K., Minoda, A., Nagatoishi, S., Tsumoto, K., Ishitani, R., and Nureki, O. (2017). Structure of the triose-phosphate/phosphate translocator reveals the basis of substrate specificity. *Nat. Plants* 3: 825–832.  
Pubmed: [Author and Title](#)  
Google Scholar: [Author Only](#) [Title Only](#) [Author and Title](#)
- Li, S. (2014). Redox Modulation Matters: Emerging Functions for Glutaredoxins in Plant Development and Stress Responses. *Plants* 3: 559–582.  
Pubmed: [Author and Title](#)  
Google Scholar: [Author Only](#) [Title Only](#) [Author and Title](#)
- Li, Y., Li, H., Morgan, C., Bomblies, K., Yang, W., and Qi, B. (2019). Both male and female gametogenesis require a fully functional protein S-acyl transferase 21 in *Arabidopsis thaliana*. *Plant J.*  
Pubmed: [Author and Title](#)  
Google Scholar: [Author Only](#) [Title Only](#) [Author and Title](#)
- Liebthal, M., Maynard, D., and Dietz, K.-J. (2018). Peroxiredoxins and Redox Signaling in Plants. *Antioxid. Redox Signal.* 28: 609–624.  
Pubmed: [Author and Title](#)  
Google Scholar: [Author Only](#) [Title Only](#) [Author and Title](#)
- Lin, Y., Cluette-brown, J.E., and Goodman, H.M. (2004). The Peroxisome Deficient Arabidopsis Mutant sse1 Exhibits Impaired Fatty Acid Synthesis 1 [w]. 135: 814–827.  
Pubmed: [Author and Title](#)  
Google Scholar: [Author Only](#) [Title Only](#) [Author and Title](#)
- Lin, Y., Sun, L., Nguyen, L. V., Rachubinski, R.A., and Goodman, H.M. (1999). The Pex16p homolog SSE1 and storage organelle formation in Arabidopsis seeds. *Science* 284: 328–30.  
Pubmed: [Author and Title](#)  
Google Scholar: [Author Only](#) [Title Only](#) [Author and Title](#)
- Linka, N., Theodoulou, F.L., Haslam, R.P., Linka, M., Napier, J. a, Neuhaus, H.E., and Weber, A.P.M. (2008). Peroxisomal ATP import is essential for seedling development in *Arabidopsis thaliana*. *Plant Cell* 20: 3241–3257.  
Pubmed: [Author and Title](#)  
Google Scholar: [Author Only](#) [Title Only](#) [Author and Title](#)
- Lisenbee, C.S., Karnik, S.K., and Trelease, R.N. (2003). Overexpression and Mislocalization of a Tail-Anchored GFP Redefines the Identity of Peroxisomal ER. *Traffic* 4: 491–501.  
Pubmed: [Author and Title](#)  
Google Scholar: [Author Only](#) [Title Only](#) [Author and Title](#)
- Majeran, W., Le Caer, J.P., Ponnala, L., Meinel, T., and Giglione, C. (2018). Targeted profiling of Arabidopsis thaliana subproteomes illuminates co- and posttranslationally N-terminal myristoylated proteins. *Plant Cell* 30: 543–562.  
Pubmed: [Author and Title](#)  
Google Scholar: [Author Only](#) [Title Only](#) [Author and Title](#)
- Marty, L. et al. (2019). Arabidopsis glutathione reductase 2 is indispensable in plastids, while mitochondrial glutathione is safeguarded by additional reduction and transport systems. *New Phytol.*  
Pubmed: [Author and Title](#)  
Google Scholar: [Author Only](#) [Title Only](#) [Author and Title](#)
- Marty, L., Siala, W., Schwarzländer, M., Fricker, M.D., Wirtz, M., Sweetlove, L.J., Meyer, Y., Meyer, A.J., Reichheld, J.-P., and Hell, R. (2009). The NADPH-dependent thioredoxin system constitutes a functional backup for cytosolic glutathione reductase in Arabidopsis. *Proc. Natl. Acad. Sci. U. S. A.* 106: 9109–9114.  
Pubmed: [Author and Title](#)

Google Scholar: [Author Only](#) [Title Only](#) [Author and Title](#)

**McDonnell, M.M., Burkhart, S.E., Stoddard, J.M., Wright, Z.J., Strader, L.C., and Bartel, B. (2016).** The early-acting peroxin PEX19 is redundantly encoded, farnesylated, and essential for viability in *Arabidopsis thaliana*. *PLoS One* 11: 1–19.

Pubmed: [Author and Title](#)

Google Scholar: [Author Only](#) [Title Only](#) [Author and Title](#)

**Meng, L., Wong, J.H., Feldman, L.J., Lemaux, P.G., and Buchanan, B.B. (2010).** A membrane-associated thioredoxin required for plant growth moves from cell to cell, suggestive of a role in intercellular communication. *Proc. Natl. Acad. Sci. U. S. A.* 107: 3900–3905.

Pubmed: [Author and Title](#)

Google Scholar: [Author Only](#) [Title Only](#) [Author and Title](#)

**Meyer, T., Hölscher, C., Schwöppe, C., and von Schaewen, A (2011).** Alternative targeting of *Arabidopsis* plastidic glucose-6-phosphate dehydrogenase G6PD1 involves cysteine-dependent interaction with G6PD4 in the cytosol. *Plant J.* 66: 745–758.

Pubmed: [Author and Title](#)

Google Scholar: [Author Only](#) [Title Only](#) [Author and Title](#)

**Mhamdi, A., Mauve, C., Gouia, H., Saindrenan, P., Hodges, M., and Noctor, G. (2010).** Cytosolic NADP-dependent isocitrate dehydrogenase contributes to redox homeostasis and the regulation of pathogen responses in *Arabidopsis* leaves. *Plant, Cell Environ.* 33: 1112–1123.

Pubmed: [Author and Title](#)

Google Scholar: [Author Only](#) [Title Only](#) [Author and Title](#)

**Mueckler, M. and Lodish, H.F. (1986).** The human glucose transporter can insert posttranslationally into microsomes. *Cell* 44: 629–637.

Pubmed: [Author and Title](#)

Google Scholar: [Author Only](#) [Title Only](#) [Author and Title](#)

**Mullen, R.T., Lisenbee, C.S., Miernyk, J. a, and Trelease, R.N. (1999).** Peroxisomal membrane ascorbate peroxidase is sorted to a membranous network that resembles a subdomain of the endoplasmic reticulum. *Plant Cell* 11: 2167–2185.

Pubmed: [Author and Title](#)

Google Scholar: [Author Only](#) [Title Only](#) [Author and Title](#)

**Mullen, R.T. and Trelease, R.N. (2006).** The ER-peroxisome connection in plants: development of the "ER semi-autonomous peroxisome maturation and replication" model for plant peroxisome biogenesis. *Biochim. Biophys. Acta* 1763: 1655–1668.

Pubmed: [Author and Title](#)

Google Scholar: [Author Only](#) [Title Only](#) [Author and Title](#)

**Murphy, M.A., Phillipson, B.A., Baker, A, and Mullen, R.T. (2003).** Characterization of the Targeting Signal of the *Arabidopsis* 22-kD Integral Peroxisomal Membrane Protein 1. *Plant Physiol.* 133: 813–828.

Pubmed: [Author and Title](#)

Google Scholar: [Author Only](#) [Title Only](#) [Author and Title](#)

**Niewiadomski, P., Knappe, S., Geimer, S., Fischer, K., Schulz, B., Unte, U.S., Rosso, M.G., Ache, P., Flügge, U.-I., and Schneider, A (2005).** The *Arabidopsis* plastidic glucose 6-phosphate/phosphate translocator GPT1 is essential for pollen maturation and embryo sac development. *Plant Cell* 17: 760–775.

Pubmed: [Author and Title](#)

Google Scholar: [Author Only](#) [Title Only](#) [Author and Title](#)

**Noctor, G. and Foyer, C.H. (2016).** Intracellular redox compartmentation and ROS-related communication in regulation and signaling. *Plant Physiol.* 171: 1581–1592.

Pubmed: [Author and Title](#)

Google Scholar: [Author Only](#) [Title Only](#) [Author and Title](#)

**Nozawa, A., Nanamiya, H., Miyata, T., Linka, N., Endo, Y., Weber, A.P.M., and Tozawa, Y. (2007).** A cell-free translation and proteoliposome reconstitution system for functional analysis of plant solute transporters. *Plant Cell Physiol.* 48: 1815–1820.

Pubmed: [Author and Title](#)

Google Scholar: [Author Only](#) [Title Only](#) [Author and Title](#)

**Orcl, L., Tagaya, M., Amherdt, M., Perrelet, A., Donaldson, J.G., Lippincott-Schwartz, J., Klausner, R.D., and Rothman, J.E. (1991).** Brefeldin A, a drug that blocks secretion, prevents the assembly of non-clathrin-coated buds on Golgi cisternae. *Cell* 64: 1183–1195.

Pubmed: [Author and Title](#)

Google Scholar: [Author Only](#) [Title Only](#) [Author and Title](#)

**Palatnik, J.F., Tognetti, V.B., Poli, H.O., Rodríguez, R.E., Blanco, N., Gattuso, M., Hajirezaei, M.R., Sonnewald, U., Valle, E.M., and Carrillo, N. (2003).** Transgenic tobacco plants expressing antisense ferredoxin-NADP(H) reductase transcripts display increased susceptibility to photo-oxidative damage. *Plant J.* 35: 332–341.

Pubmed: [Author and Title](#)

Google Scholar: [Author Only](#) [Title Only](#) [Author and Title](#)

**Park, S.K. et al. (2009).** Heat-shock and redox-dependent functional switching of an h-type *Arabidopsis* thioredoxin from a disulfide reductase to a molecular chaperone. *Plant Physiol.* 150: 552–561.

Pubmed: [Author and Title](#)

Google Scholar: [Author Only](#) [Title Only](#) [Author and Title](#)

**Pitzschke, A, Forzani, C., and Hirt, H. (2006).** Reactive oxygen species signaling in plants. *Antioxidants & Redox Signaling* 8: 1757–

1764.

Pubmed: [Author and Title](#)

Google Scholar: [Author Only Title Only Author and Title](#)

**Platta, H.W. and Erdmann, R. (2007). Peroxisomal dynamics. Trends Cell Biol. 17: 474–484.**

Pubmed: [Author and Title](#)

Google Scholar: [Author Only Title Only Author and Title](#)

**Porter, B.W., Yuen, C.Y.L., and Christopher, D.A. (2015). Dual protein trafficking to secretory and non-secretory cell compartments: Clear or double vision? Plant Sci. 234: 174–179.**

Pubmed: [Author and Title](#)

Google Scholar: [Author Only Title Only Author and Title](#)

**Preiser, A.L., Fisher, N., Banerjee, A., and Sharkey, T.D. (2019). Plastidic glucose-6-phosphate dehydrogenases are regulated to maintain activity in the light. Biochem. J. 476: 1539–1551.**

Pubmed: [Author and Title](#)

Google Scholar: [Author Only Title Only Author and Title](#)

**Reumann, S. (2004). Specification of the peroxisome targeting signals type 1 and type 2 of plant peroxisomes by bioinformatics analyses. Plant Physiol. 135: 783–800.**

Pubmed: [Author and Title](#)

Google Scholar: [Author Only Title Only Author and Title](#)

**Reumann, S., Babujee, L., Ma, C., Wienkoop, S., Siemsen, T., Antonicelli, G.E., Rasche, N., Lüder, F., Weckwerth, W., and Jahn, O. (2007). Proteome analysis of Arabidopsis leaf peroxisomes reveals novel targeting peptides, metabolic pathways, and defense mechanisms. Plant Cell 19: 3170–3193.**

Pubmed: [Author and Title](#)

Google Scholar: [Author Only Title Only Author and Title](#)

**Reumann, S. and Bartel, B. (2016). Plant peroxisomes: recent discoveries in functional complexity, organelle homeostasis, and morphological dynamics. Curr. Opin. Plant Biol. 34: 17–26.**

Pubmed: [Author and Title](#)

Google Scholar: [Author Only Title Only Author and Title](#)

**Reumann, S., Ma, C., Lemke, S., and Babujee, L. (2004). AraPeroX. A database of putative Arabidopsis proteins from plant peroxisomes. Plant Physiol. 136: 2587–2608.**

Pubmed: [Author and Title](#)

Google Scholar: [Author Only Title Only Author and Title](#)

**Reumann, S., Maier, E., Benz, R., and Heldt, H.W. (1996). A specific porin is involved in the malate shuttle of leaf peroxisomes. Biochem. Soc. Trans. 24: 754–757.**

Pubmed: [Author and Title](#)

Google Scholar: [Author Only Title Only Author and Title](#)

**del Río, L.A., Corpas, F.J., Sandalio, L.M., Palma, J.M., Gómez, M., and Barroso, J.B. (2002). Reactive oxygen species, antioxidant systems and nitric oxide in peroxisomes. J. Exp. Bot. 53: 1255–1272.**

Pubmed: [Author and Title](#)

Google Scholar: [Author Only Title Only Author and Title](#)

**Riondet, C., Desouris, J.P., Montoya, J.G., Chartier, Y., Meyer, Y., and Reichheld, J.P. (2012). A dicotyledon-specific glutaredoxin GRXC1 family with dimer-dependent redox regulation is functionally redundant with GRXC2. Plant, Cell Environ. 35: 360–373.**

Pubmed: [Author and Title](#)

Google Scholar: [Author Only Title Only Author and Title](#)

**Rips, S., Bentley, N., Jeong, I.S., Welch, J.L., von Schaewen, A., and Koiwa, H. (2014). Multiple N-Glycans Cooperate in the Subcellular Targeting and Functioning of Arabidopsis KORRIGAN1. Plant Cell 26: 3792–3808.**

Pubmed: [Author and Title](#)

Google Scholar: [Author Only Title Only Author and Title](#)

**Robida, A.M. and Kerppola, T.K. (2009). Bimolecular fluorescence complementation analysis of inducible protein interactions: effects of factors affecting protein folding on fluorescent protein fragment association. J. Mol. Biol. 394: 391–409.**

Pubmed: [Author and Title](#)

Google Scholar: [Author Only Title Only Author and Title](#)

**Rokka, A., Antonenkov, V.D., Soininen, R., Immonen, H.L., Pirilä, P.L., Bergmann, U., Sormunen, R.T., Weckström, M., Benz, R., and Hiltunen, J.K. (2009). Pxmp2 is a channel-forming protein in mammalian peroxisomal membrane. PLoS One 4: 1–15.**

Pubmed: [Author and Title](#)

Google Scholar: [Author Only Title Only Author and Title](#)

**Rottensteiner, H., Kramer, A., Lorenzen, S., Stein, K., Landgraf, C., Volkmer-Engert, R., and Erdmann, R. (2004). Peroxisomal membrane proteins contain common Pex19p-binding sites that are an integral part of their targeting signals. Mol. Biol. Cell 15: 3406–3417.**

Pubmed: [Author and Title](#)

Google Scholar: [Author Only Title Only Author and Title](#)

**Rouhier, N. (2010). Plant glutaredoxins: Pivotal players in redox biology and iron-sulphur centre assembly. New Phytol. 186: 365–372.**

- Pubmed: [Author and Title](#)  
Google Scholar: [Author Only Title Only Author and Title](#)
- Sakaue, H., Iwashita, S., Yamashita, Y., Kida, Y., and Sakaguchi, M. (2016).** The N-terminal motif of PMP70 suppresses cotranslational targeting to the endoplasmic reticulum. *J. Biochem.* 159: 539–551.  
Pubmed: [Author and Title](#)  
Google Scholar: [Author Only Title Only Author and Title](#)
- Sanz-Barrio, R., Fernández-San Millán, A., Carballeda, J., Corral-Martínez, P., Seguí-Simarro, J.M., and Farran, I. (2012).** Chaperone-like properties of tobacco plastid thioredoxins f and m. *J. Exp. Bot.* 63: 365–379.  
Pubmed: [Author and Title](#)  
Google Scholar: [Author Only Title Only Author and Title](#)
- Scharte, J., Schön, H., Tjaden, Z., Weis, E., and von Schaewen, A. (2009).** Isoenzyme replacement of glucose-6-phosphate dehydrogenase in the cytosol improves stress tolerance in plants. *Proc. Natl. Acad. Sci. U. S. A.* 106: 8061–6.  
Pubmed: [Author and Title](#)  
Google Scholar: [Author Only Title Only Author and Title](#)
- Schmidt, G.W., Devillers-Thiery, A., Desruisseaux, H., Blobel, G., and Chua, N.-H. (1979).** NH<sub>2</sub>-Terminal Amino Acid Sequences of Precursor and Mature Forms of the Ribulose-1,5-Bisphosphate Carboxylase Small Subunit From *Chlamydomonas Reinhardtii*. *J. Cell Biol.* 83: 615–622.  
Pubmed: [Author and Title](#)  
Google Scholar: [Author Only Title Only Author and Title](#)
- Schnarrenberger, C., Flechner, A., and Martin, W. (1995).** Enzymatic Evidence for a Complete Oxidative Pentose Phosphate Pathway in Chloroplasts and an Incomplete Pathway in the Cytosol of Spinach Leaves. *Plant Physiol.* 108: 609–614.  
Pubmed: [Author and Title](#)  
Google Scholar: [Author Only Title Only Author and Title](#)
- Shao, S. and Hegde, R.S. (2011).** Membrane protein insertion at the endoplasmic reticulum. *Annu. Rev. Cell Dev. Biol.* 27: 25–56.  
Pubmed: [Author and Title](#)  
Google Scholar: [Author Only Title Only Author and Title](#)
- Sharkey, T.D. and Weise, S.E. (2016).** The glucose 6-phosphate shunt around the Calvin-Benson cycle. *J. Exp. Bot.* 67: 4067–4077.  
Pubmed: [Author and Title](#)  
Google Scholar: [Author Only Title Only Author and Title](#)
- Stampfl, H., Fritz, M., Dal Santo, S., and Jonak, C. (2016).** The GSK3/Shaggy-like kinase ASK $\alpha$  contributes to pattern-triggered immunity in *Arabidopsis thaliana*. *Plant Physiol.* 171: pp.01741.2015.  
Pubmed: [Author and Title](#)  
Google Scholar: [Author Only Title Only Author and Title](#)
- Tabak, H.F., Hoepfner, D., van der Zand, A., Geuze, H.J., Braakman, I., and Huynen, M.A. (2006).** Formation of peroxisomes: Present and past. *Biochim. Biophys. Acta* 1763: 1647–1654.  
Pubmed: [Author and Title](#)  
Google Scholar: [Author Only Title Only Author and Title](#)
- Theodoulou, F.L., Bernhardt, K., Linka, N., and Baker, A. (2013).** Peroxisome membrane proteins: multiple trafficking routes and multiple functions? *Biochem. J.* 451: 345–352.  
Pubmed: [Author and Title](#)  
Google Scholar: [Author Only Title Only Author and Title](#)
- Torres, M.A., Dangl, J.L., and Jones, J.D.G. (2002).** *Arabidopsis* gp91phox homologues *AtrbohD* and *AtrbohF* are required for accumulation of reactive oxygen intermediates in the plant defense response. *Proc. Natl. Acad. Sci. U. S. A.* 99: 517–522.  
Pubmed: [Author and Title](#)  
Google Scholar: [Author Only Title Only Author and Title](#)
- Traverso, J.A., Pulido, A., Rodríguez-García, M.I., and Alché, J.D. (2013).** Thiol-based redox regulation in sexual plant reproduction: new insights and perspectives. *Front. Plant Sci.* 4: 1–14.  
Pubmed: [Author and Title](#)  
Google Scholar: [Author Only Title Only Author and Title](#)
- Ukuwela, A.A., Bush, A.I., Wedd, A.G., and Xiao, Z. (2018).** Glutaredoxins employ parallel monothiol-dithiol mechanisms to catalyze thiol-disulfide exchanges with protein disulfides. *Chem. Sci.* 9: 1173–1183.  
Pubmed: [Author and Title](#)  
Google Scholar: [Author Only Title Only Author and Title](#)
- Vandenabeele, S., Vanderauwera, S., Vuylsteke, M., Rombauts, S., Langebartels, C., Seidlitz, H.K., Zabeau, M., Van Montagu, M., Inzé, D., and Van Breusegem, F. (2004).** Catalase deficiency drastically affects gene expression induced by high light in *Arabidopsis thaliana*. *Plant J.* 39: 45–58.  
Pubmed: [Author and Title](#)  
Google Scholar: [Author Only Title Only Author and Title](#)
- Walter, M., Chaban, C., Schütze, K., Batistic, O., Weckermann, K., Näke, C., Blazevic, D., Grefen, C., Schumacher, K., Oecking, C., Harter, K., and Kudla, J. (2004).** Visualization of protein interactions in living plant cells using bimolecular fluorescence



**complementation. Plant J. 40: 428–438.**

Pubmed: [Author and Title](#)

Google Scholar: [Author Only Title Only Author and Title](#)

**Wang, Y., Windh, R.T., Chen, C.A., and Manning, D.R. (1999). N-myristoylation and  $\beta\gamma$  play roles beyond anchorage in the palmitoylation of the G protein  $\alpha(o)$  subunit. J. Biol. Chem. 274: 37435–37442.**

Pubmed: [Author and Title](#)

Google Scholar: [Author Only Title Only Author and Title](#)

**Waszczak, C., Carmody, M., and Kangasjärvi, J. (2018). Reactive Oxygen Species in Plant Signaling. Annu. Rev. Plant Biol. 69: 209–236.**

Pubmed: [Author and Title](#)

Google Scholar: [Author Only Title Only Author and Title](#)

**Weise, S.E., Liu, T., Childs, K.L., Preiser, A.L., Katulski, H.M., Perrin-Porzondek, C., and Sharkey, T.D. (2019). Transcriptional regulation of the glucose-6-phosphate/phosphate translocator 2 is related to carbon exchange across the chloroplast envelope. Front. Plant Sci. 10.**

Pubmed: [Author and Title](#)

Google Scholar: [Author Only Title Only Author and Title](#)

**van Wijk, K.J. (2015). Protein maturation and proteolysis in plant plastids, mitochondria, and peroxisomes. Annu Rev Plant Biol 66: 75–111.**

Pubmed: [Author and Title](#)

Google Scholar: [Author Only Title Only Author and Title](#)

**Wilkinson, J.E., Twell, D., and Lindsey, K. (1997). Activities of CaMV 35S and nos promoters in pollen: Implications for field release of transgenic plants. J. Exp. Bot. 48: 265–275.**

Pubmed: [Author and Title](#)

Google Scholar: [Author Only Title Only Author and Title](#)

**Winter, D. et al. (2007). An "Electronic Fluorescent Pictograph" Browser for Exploring and Analyzing Large-Scale Biological Data Sets. PLoS One e718: 1–12.**

Pubmed: [Author and Title](#)

Google Scholar: [Author Only Title Only Author and Title](#)

**Xiong, Y., Defraia, C., Williams, D., Zhang, X., and Mou, Z. (2009). Deficiency in a cytosolic ribose-5-phosphate isomerase causes chloroplast dysfunction, late flowering and premature cell death in Arabidopsis. Physiol. Plant. 137: 249–263.**

Pubmed: [Author and Title](#)

Google Scholar: [Author Only Title Only Author and Title](#)

**Zaffagnini, M., Fermani, S., Marchand, C.H., Costa, A., Sparla, F., Rouhier, N., Geigenberger, P., Lemaire, S.D., and Trost, P. (2019). Redox Homeostasis in Photosynthetic Organisms: Novel and Established Thiol-Based Molecular Mechanisms. Antioxid. Redox Signal. 31: 155–210.**

Pubmed: [Author and Title](#)

Google Scholar: [Author Only Title Only Author and Title](#)

**van der Zand, A., Braakman, I., and Tabak, H.F. (2010). Peroxisomal Membrane Proteins Insert into the Endoplasmic Reticulum. Mol. Biol. Cell 21: 2057–2065.**

Pubmed: [Author and Title](#)

Google Scholar: [Author Only Title Only Author and Title](#)

**van der Zand, A., Gent, J., Braakman, I., and Tabak, H.F. (2012). Biochemically distinct vesicles from the endoplasmic reticulum fuse to form peroxisomes. Cell 149: 397–409.**

Pubmed: [Author and Title](#)

Google Scholar: [Author Only Title Only Author and Title](#)

**Zulawski, M., Braginets, R., and Schulze, W.X. (2013). PhosPhAt goes kinases-searchable protein kinase target information in the plant phosphorylation site database PhosPhAt. Nucleic Acids Res. 41: 1176–1184.**

Pubmed: [Author and Title](#)

Google Scholar: [Author Only Title Only Author and Title](#)
